# Supplementary material
Source: publisher figshare collection journal article supplement (https://gsajournals.figshare.com/ndownloader/files/14050529)
Supplement: Supplementary file 1 [file 14050529]

## Sheet: GA14907
Appendix 3: Sequence alignment of candidate HMS genes between D. p. bogotana (strain 175), D. p. pseudoobscura (strain 139) and D. p. pseudoobscura (Flybase). Numerical position in the alignment is shown above, with the position relative to TSS (+1) bellow. The start codon of the gene CDS is bolded. The end sequence of any upstream overlapping transcripts are shown in green. Interspecies substitu…
GA14907 (-874>+674)
									1	1	1	1	1	1	1	1	1	1	2	2	2	2	2	2	2	2	2	2	3	3	3	3	3	3	3	3	3	3	4	4	4	4	4	4	4	4	4	4	5
1	2	3	4	5	6	7	8	9	0	1	2	3	4	5	6	7	8	9	0	1	2	3	4	5	6	7	8	9	0	1	2	3	4	5	6	7	8	9	0	1	2	3	4	5	6	7	8	9	0
bog175	C	T	G	G	G	C	G	A	G	G	T	G	G	A	T	C	G	A	G	C	C	A	G	A	G	C	C	A	T	C	T	A	C	G	C	C	C	A	T	T	G	C	T	C	A	C	A	G	G
pse139	C	T	G	G	G	C	G	A	G	G	T	G	G	A	T	C	G	A	G	C	C	A	G	A	G	C	C	A	T	C	T	A	C	G	C	C	C	A	T	T	G	C	T	C	A	C	A	G	G
Dpse FB	C	T	G	G	G	C	G	A	G	G	T	G	G	A	T	C	G	A	G	C	C	A	G	A	G	C	C	A	T	C	T	A	C	G	C	C	C	A	T	T	G	C	T	C	A	C	A	G	G
	-874	-873	-872	-871	-870	-869	-868	-867	-866	-865	-864	-863	-862	-861	-860	-859	-858	-857	-856	-855	-854	-853	-852	-851	-850	-849	-848	-847	-846	-845	-844	-843	-842	-841	-840	-839	-838	-837	-836	-835	-834	-833	-832	-831	-830	-829	-828	-827	-826
																			1	1	1	1	1	1	1	1	1	1	1	1	1	1	1	1	1	1	1	1	1	1	1	1	1	1	1	1	1	1	1
8	8	8	8	8	8	8	8	8	9	9	9	9	9	9	9	9	9	9	0	0	0	0	0	0	0	0	0	0	1	1	1	1	1	1	1	1	1	1	2	2	2	2	2	2	2	2	2	2	3
1	2	3	4	5	6	7	8	9	0	1	2	3	4	5	6	7	8	9	0	1	2	3	4	5	6	7	8	9	0	1	2	3	4	5	6	7	8	9	0	1	2	3	4	5	6	7	8	9	0
bog175	A	T	T	C	T	A	A	G	C	T	C	T	C	T	T	C	T	G	C	T	T	T	G	T	C	C	C	A	A	C	A	G	G	T	G	T	G	C	G	A	T	C	C	C	C	G	C	A	T
pse139	A	T	T	C	T	A	A	G	C	T	C	T	C	T	T	C	T	G	C	T	T	T	G	T	C	C	C	A	A	C	A	G	G	T	G	T	G	C	G	A	T	C	C	C	C	G	C	A	T
Dpse FB	A	T	T	C	T	A	A	G	C	T	C	T	C	T	T	C	T	G	C	T	T	T	G	T	C	C	C	A	A	C	A	G	G	T	G	T	G	C	G	A	T	C	C	C	C	G	C	A	T
	-794	-793	-792	-791	-790	-789	-788	-787	-786	-785	-784	-783	-782	-781	-780	-779	-778	-777	-776	-775	-774	-773	-772	-771	-770	-769	-768	-767	-766	-765	-764	-763	-762	-761	-760	-759	-758	-757	-756	-755	-754	-753	-752	-751	-750	-749	-748	-747	-746
1	1	1	1	1	1	1	1	1	1	1	1	1	1	1	1	1	1	1	1	1	1	1	1	1	1	1	1	1	1	1	1	1	1	1	1	1	1	1	2	2	2	2	2	2	2	2	2	2	2
6	6	6	6	6	6	6	6	6	7	7	7	7	7	7	7	7	7	7	8	8	8	8	8	8	8	8	8	8	9	9	9	9	9	9	9	9	9	9	0	0	0	0	0	0	0	0	0	0	1
1	2	3	4	5	6	7	8	9	0	1	2	3	4	5	6	7	8	9	0	1	2	3	4	5	6	7	8	9	0	1	2	3	4	5	6	7	8	9	0	1	2	3	4	5	6	7	8	9	0
bog175	T	T	C	G	A	G	G	T	G	C	G	T	C	A	T	G	G	C	A	A	C	G	A	G	G	A	T	A	C	G	A	T	G	C	G	T	G	A	A	A	T	G	C	T	G	C	G	G	A
pse139	T	T	C	G	A	G	G	T	G	C	G	T	C	A	T	G	G	C	A	A	C	G	A	G	G	A	T	A	C	G	A	T	G	C	G	T	G	A	A	A	T	G	C	T	G	C	G	G	A
Dpse FB	T	T	C	G	A	G	G	T	G	C	G	T	C	A	T	G	G	C	A	A	C	G	A	G	G	A	T	A	C	G	A	T	G	C	G	T	G	A	A	A	T	G	C	T	G	C	G	G	A
	-714	-713	-712	-711	-710	-709	-708	-707	-706	-705	-704	-703	-702	-701	-700	-699	-698	-697	-696	-695	-694	-693	-692	-691	-690	-689	-688	-687	-686	-685	-684	-683	-682	-681	-680	-679	-678	-677	-676	-675	-674	-673	-672	-671	-670	-669	-668	-667	-666
2	2	2	2	2	2	2	2	2	2	2	2	2	2	2	2	2	2	2	2	2	2	2	2	2	2	2	2	2	2	2	2	2	2	2	2	2	2	2	2	2	2	2	2	2	2	2	2	2	2
4	4	4	4	4	4	4	4	4	5	5	5	5	5	5	5	5	5	5	6	6	6	6	6	6	6	6	6	6	7	7	7	7	7	7	7	7	7	7	8	8	8	8	8	8	8	8	8	8	9
1	2	3	4	5	6	7	8	9	0	1	2	3	4	5	6	7	8	9	0	1	2	3	4	5	6	7	8	9	0	1	2	3	4	5	6	7	8	9	0	1	2	3	4	5	6	7	8	9	0
bog175	T	C	A	G	G	T	C	A	A	C	A	T	G	A	T	G	R	C	T	G	C	C	C	A	G	T	T	T	G	T	C	A	A	C	A	C	G	A	A	C	A	C	G	A	A	T	G	G	T
pse139	T	C	A	G	G	T	C	A	A	C	A	T	G	A	T	G	G	C	T	G	C	C	C	A	G	T	T	T	G	T	C	A	A	C	A	C	G	A	A	C	A	C	G	A	A	T	G	G	T
Dpse FB	T	C	A	G	G	T	C	A	A	C	A	T	G	A	T	G	G	C	T	G	C	C	C	A	G	T	T	T	G	T	C	A	A	C	A	C	G	A	A	C	A	C	G	A	A	T	G	G	T
	-634	-633	-632	-631	-630	-629	-628	-627	-626	-625	-624	-623	-622	-621	-620	-619	-618	-617	-616	-615	-614	-613	-612	-611	-610	-609	-608	-607	-606	-605	-604	-603	-602	-601	-600	-599	-598	-597	-596	-595	-594	-593	-592	-591	-590	-589	-588	-587	-586
3	3	3	3	3	3	3	3	3	3	3	3	3	3	3	3	3	3	3	3	3	3	3	3	3	3	3	3	3	3	3	3	3	3	3	3	3	3	3	3	3	3	3	3	3	3	3	3	3	3
2	2	2	2	2	2	2	2	2	3	3	3	3	3	3	3	3	3	3	4	4	4	4	4	4	4	4	4	4	5	5	5	5	5	5	5	5	5	5	6	6	6	6	6	6	6	6	6	6	7
1	2	3	4	5	6	7	8	9	0	1	2	3	4	5	6	7	8	9	0	1	2	3	4	5	6	7	8	9	0	1	2	3	4	5	6	7	8	9	0	1	2	3	4	5	6	7	8	9	0
bog175	C	G	G	A	T	G	C	C	A	T	G	C	G	G	C	T	G	C	T	C	G	A	G	G	A	G	A	A	G	G	C	C	C	G	C	C	A	G	G	C	G	G	C	G	G	C	C	G	A
pse139	C	G	G	A	T	G	C	C	A	T	G	C	G	G	C	T	G	C	T	C	G	A	G	G	A	G	A	A	G	G	C	C	C	G	C	C	A	G	G	C	G	G	C	G	G	C	C	G	A
Dpse FB	C	G	G	A	T	G	C	C	A	T	G	C	G	G	C	T	G	C	T	C	G	A	G	G	A	G	A	A	G	G	C	C	C	G	C	C	A	G	G	C	G	G	C	G	G	C	C	G	A
	-554	-553	-552	-551	-550	-549	-548	-547	-546	-545	-544	-543	-542	-541	-540	-539	-538	-537	-536	-535	-534	-533	-532	-531	-530	-529	-528	-527	-526	-525	-524	-523	-522	-521	-520	-519	-518	-517	-516	-515	-514	-513	-512	-511	-510	-509	-508	-507	-506
4	4	4	4	4	4	4	4	4	4	4	4	4	4	4	4	4	4	4	4	4	4	4	4	4	4	4	4	4	4	4	4	4	4	4	4	4	4	4	4	4	4	4	4	4	4	4	4	4	4
0	0	0	0	0	0	0	0	0	1	1	1	1	1	1	1	1	1	1	2	2	2	2	2	2	2	2	2	2	3	3	3	3	3	3	3	3	3	3	4	4	4	4	4	4	4	4	4	4	5
1	2	3	4	5	6	7	8	9	0	1	2	3	4	5	6	7	8	9	0	1	2	3	4	5	6	7	8	9	0	1	2	3	4	5	6	7	8	9	0	1	2	3	4	5	6	7	8	9	0
bog175	T	C	C	A	A	T	A	T	C	A	T	G	T	T	T	G	T	R	C	G	T	G	G	C	G	A	G	A	C	C	C	A	G	G	G	C	G	G	G	G	C	C	A	A	G	G	G	C	A
pse139	T	C	C	A	A	T	A	T	C	A	T	G	T	T	T	G	T	G	C	G	T	G	G	C	G	A	G	A	C	C	C	A	G	G	G	C	G	G	G	G	C	C	A	A	G	G	G	C	A
Dpse FB	T	C	C	A	A	T	A	T	C	A	C	G	T	T	T	G	T	G	C	G	T	G	G	C	G	A	G	A	C	C	C	A	G	G	G	C	G	G	G	G	C	C	A	A	G	G	G	C	A
	-474	-473	-472	-471	-470	-469	-468	-467	-466	-465	-464	-463	-462	-461	-460	-459	-458	-457	-456	-455	-454	-453	-452	-451	-450	-449	-448	-447	-446	-445	-444	-443	-442	-441	-440	-439	-438	-437	-436	-435	-434	-433	-432	-431	-430	-429	-428	-427	-426
4	4	4	4	4	4	4	4	4	4	4	4	4	4	4	4	4	4	4	5	5	5	5	5	5	5	5	5	5	5	5	5	5	5	5	5	5	5	5	5	5	5	5	5	5	5	5	5	5	5
8	8	8	8	8	8	8	8	8	9	9	9	9	9	9	9	9	9	9	0	0	0	0	0	0	0	0	0	0	1	1	1	1	1	1	1	1	1	1	2	2	2	2	2	2	2	2	2	2	3
1	2	3	4	5	6	7	8	9	0	1	2	3	4	5	6	7	8	9	0	1	2	3	4	5	6	7	8	9	0	1	2	3	4	5	6	7	8	9	0	1	2	3	4	5	6	7	8	9	0
bog175	T	G	A	T	A	T	T	G	G	C	G	A	C	A	G	C	G	A	G	G	A	C	G	A	C	G	A	C	G	A	C	G	A	T	G	A	G	G	A	G	G	A	G	G	A	C	C	C	G
pse139	T	G	A	T	A	T	T	G	G	C	G	A	C	A	G	C	G	A	G	G	A	C	G	A	C	G	A	C	G	A	C	G	A	T	G	A	G	G	A	G	G	A	G	G	A	C	C	C	G
Dpse FB	T	G	A	T	A	T	T	G	G	C	G	A	C	A	G	C	G	A	G	G	A	C	G	A	C	G	A	C	G	A	C	G	A	T	G	A	G	G	A	G	G	A	G	G	A	G	C	C	G
	-394	-393	-392	-391	-390	-389	-388	-387	-386	-385	-384	-383	-382	-381	-380	-379	-378	-377	-376	-375	-374	-373	-372	-371	-370	-369	-368	-367	-366	-365	-364	-363	-362	-361	-360	-359	-358	-357	-356	-355	-354	-353	-352	-351	-350	-349	-348	-347	-346
5	5	5	5	5	5	5	5	5	5	5	5	5	5	5	5	5	5	5	5	5	5	5	5	5	5	5	5	5	5	5	5	5	5	5	5	5	5	5	6	6	6	6	6	6	6	6	6	6	6
6	6	6	6	6	6	6	6	6	7	7	7	7	7	7	7	7	7	7	8	8	8	8	8	8	8	8	8	8	9	9	9	9	9	9	9	9	9	9	0	0	0	0	0	0	0	0	0	0	1
1	2	3	4	5	6	7	8	9	0	1	2	3	4	5	6	7	8	9	0	1	2	3	4	5	6	7	8	9	0	1	2	3	4	5	6	7	8	9	0	1	2	3	4	5	6	7	8	9	0
bog175	G	C	C	A	G	G	C	C	A	C	A	A	C	C	A	A	A	A	C	C	G	A	T	G	A	C	G	A	G	G	G	C	C	T	C	A	T	C	A	T	G	A	A	G	A	A	A	C	T
pse139	G	C	C	A	G	G	C	C	A	C	A	A	C	C	A	A	A	A	C	C	G	A	T	G	A	C	G	A	G	G	G	C	C	T	C	A	T	C	A	T	G	A	A	G	A	A	A	C	T
Dpse FB	G	C	C	A	G	G	C	C	A	C	A	A	C	C	A	A	A	A	C	C	G	A	T	G	A	C	G	A	G	G	G	C	C	T	C	A	T	C	A	T	G	A	A	G	A	A	A	C	T
	-314	-313	-312	-311	-310	-309	-308	-307	-306	-305	-304	-303	-302	-301	-300	-299	-298	-297	-296	-295	-294	-293	-292	-291	-290	-289	-288	-287	-286	-285	-284	-283	-282	-281	-280	-279	-278	-277	-276	-275	-274	-273	-272	-271	-270	-269	-268	-267	-266
6	6	6	6	6	6	6	6	6	6	6	6	6	6	6	6	6	6	6	6	6	6	6	6	6	6	6	6	6	6	6	6	6	6	6	6	6	6	6	6	6	6	6	6	6	6	6	6	6	6
4	4	4	4	4	4	4	4	4	5	5	5	5	5	5	5	5	5	5	6	6	6	6	6	6	6	6	6	6	7	7	7	7	7	7	7	7	7	7	8	8	8	8	8	8	8	8	8	8	9
1	2	3	4	5	6	7	8	9	0	1	2	3	4	5	6	7	8	9	0	1	2	3	4	5	6	7	8	9	0	1	2	3	4	5	6	7	8	9	0	1	2	3	4	5	6	7	8	9	0
bog175	G	T	C	T	T	T	G	G	C	A	G	C	C	T	C	A	A	G	C	C	G	A	C	A	A	A	T	C	A	A	T	C	C	G	A	T	T	C	C	G	A	T	G	A	G	G	G	A	T
pse139	G	T	C	T	T	T	G	G	C	A	G	C	C	T	C	A	A	G	C	C	G	A	C	A	A	A	T	C	A	A	T	C	C	G	A	T	T	C	C	G	A	T	G	A	G	G	G	A	T
Dpse FB	G	T	C	T	T	T	G	G	C	A	G	C	C	T	C	A	A	G	C	C	G	A	C	A	A	A	T	C	A	A	T	C	C	G	A	T	T	C	C	G	A	T	G	A	G	G	G	A	T
	-234	-233	-232	-231	-230	-229	-228	-227	-226	-225	-224	-223	-222	-221	-220	-219	-218	-217	-216	-215	-214	-213	-212	-211	-210	-209	-208	-207	-206	-205	-204	-203	-202	-201	-200	-199	-198	-197	-196	-195	-194	-193	-192	-191	-190	-189	-188	-187	-186
7	7	7	7	7	7	7	7	7	7	7	7	7	7	7	7	7	7	7	7	7	7	7	7	7	7	7	7	7	7	7	7	7	7	7	7	7	7	7	7	7	7	7	7	7	7	7	7	7	7
2	2	2	2	2	2	2	2	2	3	3	3	3	3	3	3	3	3	3	4	4	4	4	4	4	4	4	4	4	5	5	5	5	5	5	5	5	5	5	6	6	6	6	6	6	6	6	6	6	7
1	2	3	4	5	6	7	8	9	0	1	2	3	4	5	6	7	8	9	0	1	2	3	4	5	6	7	8	9	0	1	2	3	4	5	6	7	8	9	0	1	2	3	4	5	6	7	8	9	0
bog175	A	T	A	A	A	T	G	T	A	T	G	T	C	T	G	T	G	T	G	G	A	A	T	A	C	T	T	C	C	C	T	C	G	A	T	T	T	G	A	G	A	C	C	T	A	T	T	C	A
pse139	A	T	A	A	A	T	G	T	A	T	G	T	C	T	G	T	G	T	G	G	A	A	T	A	C	T	T	C	C	C	T	C	G	A	T	T	T	G	A	G	A	C	C	T	A	T	T	C	A
Dpse FB	A	T	A	A	A	T	G	T	A	T	G	T	C	T	G	T	G	T	G	G	A	A	T	A	C	T	T	C	C	C	T	C	G	A	T	T	T	-	-	-	-	-	-	-	-	-	-	-	-
	-154	-153	-152	-151	-150	-149	-148	-147	-146	-145	-144	-143	-142	-141	-140	-139	-138	-137	-136	-135	-134	-133	-132	-131	-130	-129	-128	-127	-126	-125	-124	-123	-122	-121	-120	-119	-118	-117	-116	-115	-114	-113	-112	-111	-110	-109	-108	-107	-106
8	8	8	8	8	8	8	8	8	8	8	8	8	8	8	8	8	8	8	8	8	8	8	8	8	8	8	8	8	8	8	8	8	8	8	8	8	8	8	8	8	8	8	8	8	8	8	8	8	8
0	0	0	0	0	0	0	0	0	1	1	1	1	1	1	1	1	1	1	2	2	2	2	2	2	2	2	2	2	3	3	3	3	3	3	3	3	3	3	4	4	4	4	4	4	4	4	4	4	5
1	2	3	4	5	6	7	8	9	0	1	2	3	4	5	6	7	8	9	0	1	2	3	4	5	6	7	8	9	0	1	2	3	4	5	6	7	8	9	0	1	2	3	4	5	6	7	8	9	0
bog175	T	T	C	A	A	T	A	A	T	T	C	C	T	C	G	A	R	T	C	T	C	A	G	C	A	G	G	C	G	T	T	G	G	C	A	A	T	G	T	T	T	T	C	C	T	G	C	C	G
pse139	T	T	C	A	A	T	A	A	T	T	C	C	T	C	G	A	A	T	C	T	C	A	G	C	A	G	G	C	G	T	T	G	G	C	A	A	T	G	T	T	T	T	C	C	T	G	C	C	G
Dpse FB	T	T	C	T	A	T	A	A	T	T	C	C	T	C	G	A	A	T	C	T	C	A	G	C	A	G	G	C	G	T	T	G	G	C	A	A	T	G	T	T	T	T	C	C	T	G	C	C	G
	-74	-73	-72	-71	-70	-69	-68	-67	-66	-65	-64	-63	-62	-61	-60	-59	-58	-57	-56	-55	-54	-53	-52	-51	-50	-49	-48	-47	-46	-45	-44	-43	-42	-41	-40	-39	-38	-37	-36	-35	-34	-33	-32	-31	-30	-29	-28	-27	-26
8	8	8	8	8	8	8	8	8	8	8	8	8	8	8	8	8	8	8	9	9	9	9	9	9	9	9	9	9	9	9	9	9	9	9	9	9	9	9	9	9	9	9	9	9	9	9	9	9	9
8	8	8	8	8	8	8	8	8	9	9	9	9	9	9	9	9	9	9	0	0	0	0	0	0	0	0	0	0	1	1	1	1	1	1	1	1	1	1	2	2	2	2	2	2	2	2	2	2	3
1	2	3	4	5	6	7	8	9	0	1	2	3	4	5	6	7	8	9	0	1	2	3	4	5	6	7	8	9	0	1	2	3	4	5	6	7	8	9	0	1	2	3	4	5	6	7	8	9	0
bog175	C	G	A	A	T	C	A	G	C	T	G	T	T	G	G	A	A	G	C	A	C	A	T	C	T	A	T	T	C	T	C	T	C	T	A	T	T	T	T	T	T	A	G	A	T	T	C	A	C
pse139	C	G	A	A	T	C	A	G	C	T	G	T	T	G	G	A	A	G	C	A	C	A	T	C	T	A	T	T	C	T	C	T	C	T	A	T	T	T	T	T	T	A	G	A	T	T	C	A	C
Dpse FB	C	G	C	A	T	C	A	G	C	T	G	T	T	G	G	A	A	G	C	A	C	A	T	C	T	A	T	T	C	T	C	T	C	T	A	T	T	T	T	T	T	A	G	A	T	T	T	A	C
	7	8	9	10	11	12	13	14	15	16	17	18	19	20	21	22	23	24	25	26	27	28	29	30	31	32	33	34	35	36	37	38	39	40	41	42	43	44	45	46	47	48	49	50	51	52	53	54	55
																																							1	1	1	1	1	1	1	1	1	1	1
9	9	9	9	9	9	9	9	9	9	9	9	9	9	9	9	9	9	9	9	9	9	9	9	9	9	9	9	9	9	9	9	9	9	9	9	9	9	9	0	0	0	0	0	0	0	0	0	0	0
6	6	6	6	6	6	6	6	6	7	7	7	7	7	7	7	7	7	7	8	8	8	8	8	8	8	8	8	8	9	9	9	9	9	9	9	9	9	9	0	0	0	0	0	0	0	0	0	0	1
1	2	3	4	5	6	7	8	9	0	1	2	3	4	5	6	7	8	9	0	1	2	3	4	5	6	7	8	9	0	1	2	3	4	5	6	7	8	9	0	1	2	3	4	5	6	7	8	9	0
bog175	T	G	T	C	T	G	A	A	A	C	T	G	T	C	T	G	A	A	A	A	A	T	A	A	G	A	G	A	A	C	T	T	T	C	G	T	A	A	C	C	T	G	T	C	G	C	G	A	G
pse139	T	G	T	C	T	G	A	A	A	C	T	G	T	C	T	G	A	A	A	A	A	T	A	A	G	A	G	A	A	C	T	T	T	C	G	T	A	A	C	C	T	G	T	C	G	C	G	A	G
Dpse FB	T	G	T	C	T	G	A	A	A	C	T	G	T	C	T	G	A	A	A	A	A	T	A	A	G	A	A	A	A	C	T	T	T	C	G	T	A	A	C	C	T	G	T	C	G	C	G	A	G
	87	88	89	90	91	92	93	94	95	96	97	98	99	100	101	102	103	104	105	106	107	108	109	110	111	112	113	114	115	116	117	118	119	120	121	122	123	124	125	126	127	128	129	130	131	132	133	134	135
1	1	1	1	1	1	1	1	1	1	1	1	1	1	1	1	1	1	1	1	1	1	1	1	1	1	1	1	1	1	1	1	1	1	1	1	1	1	1	1	1	1	1	1	1	1	1	1	1	1
0	0	0	0	0	0	0	0	0	0	0	0	0	0	0	0	0	0	0	0	0	0	0	0	0	0	0	0	0	0	0	0	0	0	0	0	0	0	0	0	0	0	0	0	0	0	0	0	0	0
4	4	4	4	4	4	4	4	4	5	5	5	5	5	5	5	5	5	5	6	6	6	6	6	6	6	6	6	6	7	7	7	7	7	7	7	7	7	7	8	8	8	8	8	8	8	8	8	8	9
1	2	3	4	5	6	7	8	9	0	1	2	3	4	5	6	7	8	9	0	1	2	3	4	5	6	7	8	9	0	1	2	3	4	5	6	7	8	9	0	1	2	3	4	5	6	7	8	9	0
bog175	A	A	G	T	C	T	G	T	A	C	G	C	T	T	G	A	T	G	C	A	C	G	C	C	C	T	G	T	G	C	A	G	G	C	G	T	G	T	C	A	A	G	C	A	C	A	C	A	T
pse139	A	A	G	T	C	T	G	T	A	C	G	C	T	T	G	A	T	G	C	A	C	G	C	C	C	T	G	T	G	C	A	G	G	C	G	T	G	T	C	A	A	G	C	A	C	A	C	A	T
Dpse FB	A	A	G	T	C	T	G	T	A	C	G	C	T	T	G	A	T	G	C	A	C	G	T	C	C	T	G	T	G	C	A	G	G	C	G	T	G	T	C	A	A	G	C	A	C	A	C	A	T
	167	168	169	170	171	172	173	174	175	176	177	178	179	180	181	182	183	184	185	186	187	188	189	190	191	192	193	194	195	196	197	198	199	200	201	202	203	204	205	206	207	208	209	210	211	212	213	214	215
1	1	1	1	1	1	1	1	1	1	1	1	1	1	1	1	1	1	1	1	1	1	1	1	1	1	1	1	1	1	1	1	1	1	1	1	1	1	1	1	1	1	1	1	1	1	1	1	1	1
1	1	1	1	1	1	1	1	1	1	1	1	1	1	1	1	1	1	1	1	1	1	1	1	1	1	1	1	1	1	1	1	1	1	1	1	1	1	1	1	1	1	1	1	1	1	1	1	1	1
2	2	2	2	2	2	2	2	2	3	3	3	3	3	3	3	3	3	3	4	4	4	4	4	4	4	4	4	4	5	5	5	5	5	5	5	5	5	5	6	6	6	6	6	6	6	6	6	6	7
1	2	3	4	5	6	7	8	9	0	1	2	3	4	5	6	7	8	9	0	1	2	3	4	5	6	7	8	9	0	1	2	3	4	5	6	7	8	9	0	1	2	3	4	5	6	7	8	9	0
bog175	A	C	G	G	C	A	A	T	A	C	G	C	C	G	A	G	A	A	A	T	G	C	G	A	C	T	C	G	G	T	G	A	T	C	A	A	A	G	G	C	G	T	T	G	T	G	G	T	G
pse139	A	C	G	G	C	A	A	T	A	C	G	C	C	G	A	G	A	A	A	T	G	C	G	A	C	T	C	G	G	T	G	A	T	C	A	A	A	G	G	C	G	T	T	G	T	G	G	T	G
Dpse FB	A	C	G	G	C	A	A	T	A	C	G	C	C	G	A	G	A	A	A	T	G	C	G	A	C	T	C	G	G	T	G	A	T	C	A	A	A	G	G	C	G	T	T	G	T	G	G	T	G
	247	248	249	250	251	252	253	254	255	256	257	258	259	260	261	262	263	264	265	266	267	268	269	270	271	272	273	274	275	276	277	278	279	280	281	282	283	284	285	286	287	288	289	290	291	292	293	294	295
1	1	1	1	1	1	1	1	1	1	1	1	1	1	1	1	1	1	1	1	1	1	1	1	1	1	1	1	1	1	1	1	1	1	1	1	1	1	1	1	1	1	1	1	1	1	1	1	1	1
2	2	2	2	2	2	2	2	2	2	2	2	2	2	2	2	2	2	2	2	2	2	2	2	2	2	2	2	2	2	2	2	2	2	2	2	2	2	2	2	2	2	2	2	2	2	2	2	2	2
0	0	0	0	0	0	0	0	0	1	1	1	1	1	1	1	1	1	1	2	2	2	2	2	2	2	2	2	2	3	3	3	3	3	3	3	3	3	3	4	4	4	4	4	4	4	4	4	4	5
1	2	3	4	5	6	7	8	9	0	1	2	3	4	5	6	7	8	9	0	1	2	3	4	5	6	7	8	9	0	1	2	3	4	5	6	7	8	9	0	1	2	3	4	5	6	7	8	9	0
bog175	C	C	A	G	G	A	T	G	A	C	A	C	C	A	T	C	C	G	G	C	G	A	G	A	A	G	T	T	T	G	A	C	G	A	T	C	G	T	G	T	C	C	A	G	G	G	C	A	A
pse139	C	C	A	G	G	A	T	G	A	C	A	C	C	A	T	C	C	G	G	C	G	A	G	A	A	G	T	T	T	G	A	C	G	A	T	C	G	T	G	T	C	C	A	G	G	G	C	A	A
Dpse FB	C	C	A	G	G	A	T	G	A	C	A	C	C	A	T	C	C	G	G	C	G	A	G	A	A	G	T	T	T	G	A	C	G	A	T	C	G	T	G	T	C	C	A	G	G	G	T	A	A
	327	328	329	330	331	332	333	334	335	336	337	338	339	340	341	342	343	344	345	346	347	348	349	350	351	352	353	354	355	356	357	358	359	360	361	362	363	364	365	366	367	368	369	370	371	372	373	374	375
1	1	1	1	1	1	1	1	1	1	1	1	1	1	1	1	1	1	1	1	1	1	1	1	1	1	1	1	1	1	1	1	1	1	1	1	1	1	1	1	1	1	1	1	1	1	1	1	1	1
2	2	2	2	2	2	2	2	2	2	2	2	2	2	2	2	2	2	2	3	3	3	3	3	3	3	3	3	3	3	3	3	3	3	3	3	3	3	3	3	3	3	3	3	3	3	3	3	3	3
8	8	8	8	8	8	8	8	8	9	9	9	9	9	9	9	9	9	9	0	0	0	0	0	0	0	0	0	0	1	1	1	1	1	1	1	1	1	1	2	2	2	2	2	2	2	2	2	2	3
1	2	3	4	5	6	7	8	9	0	1	2	3	4	5	6	7	8	9	0	1	2	3	4	5	6	7	8	9	0	1	2	3	4	5	6	7	8	9	0	1	2	3	4	5	6	7	8	9	0
bog175	A	G	T	G	G	C	C	A	G	C	T	G	G	G	A	A	A	A	G	G	C	C	G	T	G	T	C	T	T	C	A	T	G	A	A	C	G	T	G	G	A	T	G	C	G	G	A	G	T
pse139	A	G	T	G	G	C	C	A	G	C	T	G	G	G	A	A	A	A	G	G	C	C	G	T	G	T	C	T	T	C	A	T	G	A	A	C	G	T	G	G	A	T	G	C	G	G	A	G	T
Dpse FB	A	G	T	G	G	C	C	A	G	C	T	G	G	G	A	A	A	A	G	G	C	C	G	T	G	T	C	T	T	C	A	T	G	A	A	C	G	T	G	G	A	T	G	C	G	G	A	G	T
	407	408	409	410	411	412	413	414	415	416	417	418	419	420	421	422	423	424	425	426	427	428	429	430	431	432	433	434	435	436	437	438	439	440	441	442	443	444	445	446	447	448	449	450	451	452	453	454	455
1	1	1	1	1	1	1	1	1	1	1	1	1	1	1	1	1	1	1	1	1	1	1	1	1	1	1	1	1	1	1	1	1	1	1	1	1	1	1	1	1	1	1	1	1	1	1	1	1	1
3	3	3	3	3	3	3	3	3	3	3	3	3	3	3	3	3	3	3	3	3	3	3	3	3	3	3	3	3	3	3	3	3	3	3	3	3	3	3	4	4	4	4	4	4	4	4	4	4	4
6	6	6	6	6	6	6	6	6	7	7	7	7	7	7	7	7	7	7	8	8	8	8	8	8	8	8	8	8	9	9	9	9	9	9	9	9	9	9	0	0	0	0	0	0	0	0	0	0	1
1	2	3	4	5	6	7	8	9	0	1	2	3	4	5	6	7	8	9	0	1	2	3	4	5	6	7	8	9	0	1	2	3	4	5	6	7	8	9	0	1	2	3	4	5	6	7	8	9	0
bog175	G	G	A	G	G	G	G	G	C	C	G	G	C	T	T	C	A	A	C	G	A	C	C	T	G	G	A	G	A	T	G	A	T	C	G	A	C	G	A	G	G	G	A	A	T	G	G	A	G
pse139	G	G	A	G	G	G	G	G	C	C	G	G	C	T	T	C	A	A	C	G	A	C	C	T	G	G	A	G	A	T	G	A	T	C	G	A	C	G	A	G	G	G	A	A	T	G	G	A	G
Dpse FB	G	G	A	G	G	G	G	G	C	C	G	G	C	T	T	C	A	A	C	G	A	C	C	T	G	G	A	G	A	T	G	A	T	C	G	A	C	G	A	G	G	G	A	A	T	G	G	A	G
	487	488	489	490	491	492	493	494	495	496	497	498	499	500	501	502	503	504	505	506	507	508	509	510	511	512	513	514	515	516	517	518	519	520	521	522	523	524	525	526	527	528	529	530	531	532	533	534	535
1	1	1	1	1	1	1	1	1	1	1	1	1	1	1	1	1	1	1	1	1	1	1	1	1	1	1	1	1	1	1	1	1	1	1	1	1	1	1	1	1	1	1	1	1	1	1	1	1	1
4	4	4	4	4	4	4	4	4	4	4	4	4	4	4	4	4	4	4	4	4	4	4	4	4	4	4	4	4	4	4	4	4	4	4	4	4	4	4	4	4	4	4	4	4	4	4	4	4	4
4	4	4	4	4	4	4	4	4	5	5	5	5	5	5	5	5	5	5	6	6	6	6	6	6	6	6	6	6	7	7	7	7	7	7	7	7	7	7	8	8	8	8	8	8	8	8	8	8	9
1	2	3	4	5	6	7	8	9	0	1	2	3	4	5	6	7	8	9	0	1	2	3	4	5	6	7	8	9	0	1	2	3	4	5	6	7	8	9	0	1	2	3	4	5	6	7	8	9	0
bog175	G	G	G	C	C	C	T	T	C	A	A	A	T	G	C	A	G	G	G	C	T	G	C	A	C	A	G	A	T	G	T	C	T	T	C	G	T	G	G	A	G	T	C	G	A	T	G	G	A
pse139	G	G	G	C	C	C	T	T	C	A	A	A	T	G	C	A	G	G	G	C	T	G	C	A	C	A	G	A	T	G	T	C	T	T	C	G	T	G	G	A	G	T	C	G	A	T	G	G	A
Dpse FB	G	G	G	C	C	C	T	T	C	A	A	A	T	G	C	A	G	G	G	C	T	G	C	A	C	A	G	A	T	G	T	C	T	T	C	G	T	G	G	A	G	T	C	G	A	T	G	G	A
	567	568	569	570	571	572	573	574	575	576	577	578	579	580	581	582	583	584	585	586	587	588	589	590	591	592	593	594	595	596	597	598	599	600	601	602	603	604	605	606	607	608	609	610	611	612	613	614	615
1	1	1	1	1	1	1	1	1	1	1	1	1	1	1	1	1	1	1	1	1	1	1	1	1	1	1	1
5	5	5	5	5	5	5	5	5	5	5	5	5	5	5	5	5	5	5	5	5	5	5	5	5	5	5	5
2	2	2	2	2	2	2	2	2	3	3	3	3	3	3	3	3	3	3	4	4	4	4	4	4	4	4	4
1	2	3	4	5	6	7	8	9	0	1	2	3	4	5	6	7	8	9	0	1	2	3	4	5	6	7	8
bog175	T	T	G	G	C	C	G	T	C	T	G	G	C	G	C	T	A	C	A	A	C	A	C	C	A	A	C	A
pse139	T	T	G	G	C	C	G	T	C	T	G	G	C	G	C	T	A	C	A	A	C	A	C	C	A	A	C	A
Dpse FB	T	T	G	G	C	C	G	T	C	T	G	G	C	G	C	T	A	C	A	A	C	A	C	C	A	A	C	A
	647	648	649	650	651	652	653	654	655	656	657	658	659	660	661	662	663	664	665	666	667	668	669	670	671	672	673	674
	Position
SRX	72
204750	b
204751	b
204756	b
204757	b
204766	b
204768	b
204780	b
204787	b
204789	b
204790	b
204791	b
204792	b
204769	p
204774	p
[truncated: 31 more columns]

## Sheet: GA19543
Note: Highlighted in blue are exonic regions before the start of the CDS that are interruped by introns.
GA19543 (-712>+1,601)
									1	1	1	1	1	1	1	1	1	1	2	2	2	2	2	2	2	2	2	2	3	3	3	3	3	3	3	3	3	3	4	4	4	4	4	4	4	4	4	4	5
1	2	3	4	5	6	7	8	9	0	1	2	3	4	5	6	7	8	9	0	1	2	3	4	5	6	7	8	9	0	1	2	3	4	5	6	7	8	9	0	1	2	3	4	5	6	7	8	9	0
bog175	A	G	C	A	T	C	A	G	A	G	A	T	C	A	A	T	A	T	A	C	A	C	A	T	A	C	T	C	G	G	A	T	G	T	A	A	G	G	A	A	A	T	A	C	G	G	A	A	A
pse139	A	G	C	A	T	C	A	G	A	G	A	T	C	A	A	T	A	T	A	C	A	C	A	T	A	C	T	C	G	G	A	T	G	T	A	A	G	G	A	A	A	T	A	C	G	G	A	A	A
pseFB	A	G	C	A	T	C	A	G	A	G	A	T	C	A	A	T	A	T	A	C	A	C	A	T	A	C	T	C	G	G	A	T	G	T	A	A	G	G	A	A	A	T	A	C	G	G	A	A	A
	-712	-711	-710	-709	-708	-707	-706	-705	-704	-703	-702	-701	-700	-699	-698	-697	-696	-695	-694	-693	-692	-691	-690	-689	-688	-687	-686	-685	-684	-683	-682	-681	-680	-679	-678	-677	-676	-675	-674	-673	-672	-671	-670	-669	-668	-667	-666	-665	-664
																			1	1	1	1	1	1	1	1	1	1	1	1	1	1	1	1	1	1	1	1	1	1	1	1	1	1	1	1	1	1	1
8	8	8	8	8	8	8	8	8	9	9	9	9	9	9	9	9	9	9	0	0	0	0	0	0	0	0	0	0	1	1	1	1	1	1	1	1	1	1	2	2	2	2	2	2	2	2	2	2	3
1	2	3	4	5	6	7	8	9	0	1	2	3	4	5	6	7	8	9	0	1	2	3	4	5	6	7	8	9	0	1	2	3	4	5	6	7	8	9	0	1	2	3	4	5	6	7	8	9	0
bog175	T	G	T	T	T	T	T	A	A	G	A	T	T	A	T	G	C	A	A	A	C	A	T	C	G	T	T	C	T	A	C	A	G	T	G	C	G	C	A	A	A	T	G	T	G	C	A	C	A
pse139	T	G	T	T	T	T	T	A	A	G	A	T	T	A	T	G	C	A	A	A	C	A	T	C	G	T	T	C	T	A	C	A	G	T	G	C	G	C	A	A	A	T	G	T	G	C	A	C	A
pseFB	T	G	T	T	T	T	T	A	A	G	A	T	T	A	T	G	C	A	A	A	C	A	T	C	G	T	T	C	T	A	C	A	G	T	G	C	G	C	A	A	A	T	G	T	G	C	A	C	A
	-632	-631	-630	-629	-628	-627	-626	-625	-624	-623	-622	-621	-620	-619	-618	-617	-616	-615	-614	-613	-612	-611	-610	-609	-608	-607	-606	-605	-604	-603	-602	-601	-600	-599	-598	-597	-596	-595	-594	-593	-592	-591	-590	-589	-588	-587	-586	-585	-584
1	1	1	1	1	1	1	1	1	1	1	1	1	1	1	1	1	1	1	1	1	1	1	1	1	1	1	1	1	1	1	1	1	1	1	1	1	1	1	2	2	2	2	2	2	2	2	2	2	2
6	6	6	6	6	6	6	6	6	7	7	7	7	7	7	7	7	7	7	8	8	8	8	8	8	8	8	8	8	9	9	9	9	9	9	9	9	9	9	0	0	0	0	0	0	0	0	0	0	1
1	2	3	4	5	6	7	8	9	0	1	2	3	4	5	6	7	8	9	0	1	2	3	4	5	6	7	8	9	0	1	2	3	4	5	6	7	8	9	0	1	2	3	4	5	6	7	8	9	0
bog175	C	C	A	T	A	C	A	A	A	T	C	T	G	A	G	C	T	C	A	T	C	G	G	C	T	G	T	T	T	C	A	G	C	G	C	A	G	T	G	G	A	A	A	T	A	C	C	G	C
pse139	C	C	A	T	A	C	A	A	A	T	C	T	G	A	G	C	T	C	A	T	C	G	G	C	T	G	T	T	T	C	A	G	C	G	C	A	G	T	G	G	A	A	A	T	A	C	C	G	C
pseFB	C	C	A	T	A	C	A	A	A	T	C	T	G	A	G	C	T	C	A	T	C	G	G	C	T	G	T	T	T	C	A	G	C	G	C	A	G	T	G	G	A	A	A	T	A	C	C	G	C
	-552	-551	-550	-549	-548	-547	-546	-545	-544	-543	-542	-541	-540	-539	-538	-537	-536	-535	-534	-533	-532	-531	-530	-529	-528	-527	-526	-525	-524	-523	-522	-521	-520	-519	-518	-517	-516	-515	-514	-513	-512	-511	-510	-509	-508	-507	-506	-505	-504
2	2	2	2	2	2	2	2	2	2	2	2	2	2	2	2	2	2	2	2	2	2	2	2	2	2	2	2	2	2	2	2	2	2	2	2	2	2	2	2	2	2	2	2	2	2	2	2	2	2
4	4	4	4	4	4	4	4	4	5	5	5	5	5	5	5	5	5	5	6	6	6	6	6	6	6	6	6	6	7	7	7	7	7	7	7	7	7	7	8	8	8	8	8	8	8	8	8	8	9
1	2	3	4	5	6	7	8	9	0	1	2	3	4	5	6	7	8	9	0	1	2	3	4	5	6	7	8	9	0	1	2	3	4	5	6	7	8	9	0	1	2	3	4	5	6	7	8	9	0
bog175	C	C	T	C	T	C	T	G	T	A	A	T	C	T	T	T	G	G	C	A	C	A	T	G	T	T	G	T	G	T	G	C	C	G	T	G	A	T	T	C	A	T	G	C	A	T	A	A	A
pse139	C	C	T	C	T	C	T	G	T	A	A	T	C	T	T	T	G	G	C	A	C	A	T	G	T	T	G	T	G	T	G	C	C	G	T	G	A	T	T	C	A	T	G	C	A	T	A	A	A
pseFB	C	C	T	C	T	C	T	G	T	A	A	T	C	T	T	T	G	G	C	A	C	A	T	G	T	T	G	T	G	T	G	C	C	G	T	G	A	T	T	C	A	T	G	C	A	T	A	A	A
	-472	-471	-470	-469	-468	-467	-466	-465	-464	-463	-462	-461	-460	-459	-458	-457	-456	-455	-454	-453	-452	-451	-450	-449	-448	-447	-446	-445	-444	-443	-442	-441	-440	-439	-438	-437	-436	-435	-434	-433	-432	-431	-430	-429	-428	-427	-426	-425	-424
3	3	3	3	3	3	3	3	3	3	3	3	3	3	3	3	3	3	3	3	3	3	3	3	3	3	3	3	3	3	3	3	3	3	3	3	3	3	3	3	3	3	3	3	3	3	3	3	3	3
2	2	2	2	2	2	2	2	2	3	3	3	3	3	3	3	3	3	3	4	4	4	4	4	4	4	4	4	4	5	5	5	5	5	5	5	5	5	5	6	6	6	6	6	6	6	6	6	6	7
1	2	3	4	5	6	7	8	9	0	1	2	3	4	5	6	7	8	9	0	1	2	3	4	5	6	7	8	9	0	1	2	3	4	5	6	7	8	9	0	1	2	3	4	5	6	7	8	9	0
bog175	C	T	T	A	A	T	G	A	A	A	T	C	C	C	C	T	A	G	A	A	T	C	T	A	A	T	C	G	A	A	T	C	G	A	A	T	C	T	C	C	T	C	C	A	G	G	C	T	G
pse139	C	T	T	A	A	T	G	A	A	A	T	C	C	C	C	T	A	G	A	A	T	C	T	A	A	T	C	G	A	A	T	C	G	A	A	T	C	T	C	C	T	C	C	A	G	G	C	T	G
pseFB	C	T	T	A	A	T	G	A	A	A	T	C	C	C	C	T	A	G	A	A	T	C	T	A	A	T	C	G	A	A	T	C	G	A	A	T	C	T	C	C	T	C	C	A	G	G	C	T	G
	-392	-391	-390	-389	-388	-387	-386	-385	-384	-383	-382	-381	-380	-379	-378	-377	-376	-375	-374	-373	-372	-371	-370	-369	-368	-367	-366	-365	-364	-363	-362	-361	-360	-359	-358	-357	-356	-355	-354	-353	-352	-351	-350	-349	-348	-347	-346	-345	-344
4	4	4	4	4	4	4	4	4	4	4	4	4	4	4	4	4	4	4	4	4	4	4	4	4	4	4	4	4	4	4	4	4	4	4	4	4	4	4	4	4	4	4	4	4	4	4	4	4	4
0	0	0	0	0	0	0	0	0	1	1	1	1	1	1	1	1	1	1	2	2	2	2	2	2	2	2	2	2	3	3	3	3	3	3	3	3	3	3	4	4	4	4	4	4	4	4	4	4	5
1	2	3	4	5	6	7	8	9	0	1	2	3	4	5	6	7	8	9	0	1	2	3	4	5	6	7	8	9	0	1	2	3	4	5	6	7	8	9	0	1	2	3	4	5	6	7	8	9	0
bog175	G	G	C	C	A	T	C	G	C	T	G	G	A	T	C	T	G	A	G	T	C	A	C	A	G	T	T	G	G	G	T	T	T	C	G	T	T	T	A	C	T	C	T	T	T	A	A	T	T
pse139	G	G	C	C	A	T	C	G	C	T	G	G	A	T	C	T	G	A	G	T	C	A	C	A	G	T	T	G	G	G	T	T	T	C	G	T	T	T	A	C	T	C	T	T	T	A	A	T	T
pseFB	G	G	C	C	A	T	C	G	C	T	G	G	A	T	C	T	G	A	G	T	C	A	C	A	G	T	T	G	G	G	T	T	T	C	G	T	T	T	A	C	T	C	T	T	T	A	A	T	T
	-312	-311	-310	-309	-308	-307	-306	-305	-304	-303	-302	-301	-300	-299	-298	-297	-296	-295	-294	-293	-292	-291	-290	-289	-288	-287	-286	-285	-284	-283	-282	-281	-280	-279	-278	-277	-276	-275	-274	-273	-272	-271	-270	-269	-268	-267	-266	-265	-264
4	4	4	4	4	4	4	4	4	4	4	4	4	4	4	4	4	4	4	5	5	5	5	5	5	5	5	5	5	5	5	5	5	5	5	5	5	5	5	5	5	5	5	5	5	5	5	5	5	5
8	8	8	8	8	8	8	8	8	9	9	9	9	9	9	9	9	9	9	0	0	0	0	0	0	0	0	0	0	1	1	1	1	1	1	1	1	1	1	2	2	2	2	2	2	2	2	2	2	3
1	2	3	4	5	6	7	8	9	0	1	2	3	4	5	6	7	8	9	0	1	2	3	4	5	6	7	8	9	0	1	2	3	4	5	6	7	8	9	0	1	2	3	4	5	6	7	8	9	0
bog175	T	A	G	T	G	C	T	T	T	G	G	T	G	C	T	G	T	T	G	G	G	T	T	A	A	G	C	T	C	G	A	T	T	C	T	G	C	G	A	A	G	A	G	C	T	G	G	C	A
pse139	T	A	G	T	G	C	T	T	T	G	G	T	G	C	T	G	T	T	G	G	G	T	T	A	A	G	C	T	C	G	A	T	T	C	T	G	C	G	A	A	G	A	G	C	T	G	G	C	A
pseFB	T	A	G	T	G	C	T	T	T	G	G	T	G	C	T	G	T	T	G	G	G	T	T	A	A	G	C	T	C	G	A	T	T	C	T	G	C	G	A	A	G	A	G	C	T	G	G	A	A
	-232	-231	-230	-229	-228	-227	-226	-225	-224	-223	-222	-221	-220	-219	-218	-217	-216	-215	-214	-213	-212	-211	-210	-209	-208	-207	-206	-205	-204	-203	-202	-201	-200	-199	-198	-197	-196	-195	-194	-193	-192	-191	-190	-189	-188	-187	-186	-185	-184
5	5	5	5	5	5	5	5	5	5	5	5	5	5	5	5	5	5	5	5	5	5	5	5	5	5	5	5	5	5	5	5	5	5	5	5	5	5	5	6	6	6	6	6	6	6	6	6	6	6
6	6	6	6	6	6	6	6	6	7	7	7	7	7	7	7	7	7	7	8	8	8	8	8	8	8	8	8	8	9	9	9	9	9	9	9	9	9	9	0	0	0	0	0	0	0	0	0	0	1
1	2	3	4	5	6	7	8	9	0	1	2	3	4	5	6	7	8	9	0	1	2	3	4	5	6	7	8	9	0	1	2	3	4	5	6	7	8	9	0	1	2	3	4	5	6	7	8	9	0
bog175	G	A	G	A	G	G	A	G	G	T	C	C	A	G	A	A	G	C	A	C	G	A	G	C	T	T	G	C	T	T	T	G	G	G	G	C	T	C	T	G	C	G	G	C	G	A	T	G	C
pse139	G	A	G	A	G	G	A	G	G	T	C	C	A	G	A	A	G	C	A	C	G	A	G	C	T	T	G	C	T	T	T	G	G	G	G	C	T	C	T	G	C	G	G	C	G	A	T	G	C
pseFB	G	A	G	A	G	G	A	G	G	T	C	C	A	G	A	A	G	C	A	C	G	A	G	C	T	T	G	C	T	T	T	G	G	G	G	C	T	C	T	G	C	G	G	C	G	A	T	G	C
	-152	-151	-150	-149	-148	-147	-146	-145	-144	-143	-142	-141	-140	-139	-138	-137	-136	-135	-134	-133	-132	-131	-130	-129	-128	-127	-126	-125	-124	-123	-122	-121	-120	-119	-118	-117	-116	-115	-114	-113	-112	-111	-110	-109	-108	-107	-106	-105	-104
6	6	6	6	6	6	6	6	6	6	6	6	6	6	6	6	6	6	6	6	6	6	6	6	6	6	6	6	6	6	6	6	6	6	6	6	6	6	6	6	6	6	6	6	6	6	6	6	6	6
4	4	4	4	4	4	4	4	4	5	5	5	5	5	5	5	5	5	5	6	6	6	6	6	6	6	6	6	6	7	7	7	7	7	7	7	7	7	7	8	8	8	8	8	8	8	8	8	8	9
1	2	3	4	5	6	7	8	9	0	1	2	3	4	5	6	7	8	9	0	1	2	3	4	5	6	7	8	9	0	1	2	3	4	5	6	7	8	9	0	1	2	3	4	5	6	7	8	9	0
bog175	C	G	T	C	C	G	G	T	C	A	G	T	C	C	A	G	T	C	C	A	G	C	C	C	C	C	G	G	C	C	C	G	G	C	T	T	C	G	G	T	T	C	T	T	G	G	T	C	A
pse139	C	G	T	C	C	G	G	T	C	A	G	T	C	C	A	G	T	C	C	A	G	C	C	C	C	C	G	G	C	C	C	G	G	C	T	T	C	G	G	T	T	C	T	T	G	G	T	C	A
pseFB	C	G	T	C	C	G	G	T	C	A	G	T	C	C	A	G	T	C	C	A	G	C	C	C	C	C	G	G	C	C	C	G	G	C	T	T	C	G	G	T	T	C	T	T	G	G	T	C	A
	-72	-71	-70	-69	-68	-67	-66	-65	-64	-63	-62	-61	-60	-59	-58	-57	-56	-55	-54	-53	-52	-51	-50	-49	-48	-47	-46	-45	-44	-43	-42	-41	-40	-39	-38	-37	-36	-35	-34	-33	-32	-31	-30	-29	-28	-27	-26	-25	-24
7	7	7	7	7	7	7	7	7	7	7	7	7	7	7	7	7	7	7	7	7	7	7	7	7	7	7	7	7	7	7	7	7	7	7	7	7	7	7	7	7	7	7	7	7	7	7	7	7	7
2	2	2	2	2	2	2	2	2	3	3	3	3	3	3	3	3	3	3	4	4	4	4	4	4	4	4	4	4	5	5	5	5	5	5	5	5	5	5	6	6	6	6	6	6	6	6	6	6	7
1	2	3	4	5	6	7	8	9	0	1	2	3	4	5	6	7	8	9	0	1	2	3	4	5	6	7	8	9	0	1	2	3	4	5	6	7	8	9	0	1	2	3	4	5	6	7	8	9	0
bog175	T	G	C	T	C	A	G	G	C	G	A	T	G	C	G	T	T	A	C	C	G	A	T	C	G	G	T	A	G	C	C	T	T	C	C	A	T	A	C	G	T	T	T	C	G	C	T	C	C
pse139	T	G	C	T	C	A	G	G	C	G	A	T	G	C	G	T	T	A	C	C	G	A	T	C	G	G	T	A	G	C	C	T	T	C	C	A	T	A	C	G	T	T	T	C	G	C	T	C	C
pseFB	T	G	C	T	C	A	G	G	C	G	A	T	G	C	G	T	T	A	C	C	G	A	T	C	G	G	T	A	G	C	C	T	T	C	C	A	T	A	C	G	T	T	T	C	G	C	T	C	C
	9	10	11	12	13	14	15	16	17	18	19	20	21	22	23	24	25	26	27	28	29	30	31	32	33	34	35	36	37	38	39	40	41	42	43	44	45	46	47	48	49	50	51	52	53	54	55	56	57
8	8	8	8	8	8	8	8	8	8	8	8	8	8	8	8	8	8	8	8	8	8	8	8	8	8	8	8	8	8	8	8	8	8	8	8	8	8	8	8	8	8	8	8	8	8	8	8	8	8
0	0	0	0	0	0	0	0	0	1	1	1	1	1	1	1	1	1	1	2	2	2	2	2	2	2	2	2	2	3	3	3	3	3	3	3	3	3	3	4	4	4	4	4	4	4	4	4	4	5
1	2	3	4	5	6	7	8	9	0	1	2	3	4	5	6	7	8	9	0	1	2	3	4	5	6	7	8	9	0	1	2	3	4	5	6	7	8	9	0	1	2	3	4	5	6	7	8	9	0
bog175	C	C	G	T	T	T	T	G	C	G	A	T	A	G	C	C	A	C	C	G	G	T	T	T	T	C	A	A	C	T	T	T	G	T	T	G	A	T	C	G	T	C	T	C	T	T	A	T	T
pse139	C	C	G	T	T	T	T	G	C	G	A	T	A	G	C	C	A	C	C	G	G	T	T	T	T	C	A	A	C	T	T	T	G	T	T	G	A	T	C	G	T	C	T	C	T	T	A	T	T
pseFB	C	C	G	T	T	T	T	G	C	G	A	T	A	G	C	C	A	C	C	G	G	T	T	T	T	C	A	A	C	T	T	T	G	T	T	G	A	T	C	G	T	C	T	C	T	T	A	T	T
	89	90	91	92	93	94	95	96	97	98	99	100	101	102	103	104	105	106	107	108	109	110	111	112	113	114	115	116	117	118	119	120	121	122	123	124	125	126	127	128	129	130	131	132	133	134	135	136	137
8	8	8	8	8	8	8	8	8	8	8	8	8	8	8	8	8	8	8	9	9	9	9	9	9	9	9	9	9	9	9	9	9	9	9	9	9	9	9	9	9	9	9	9	9	9	9	9	9	9
8	8	8	8	8	8	8	8	8	9	9	9	9	9	9	9	9	9	9	0	0	0	0	0	0	0	0	0	0	1	1	1	1	1	1	1	1	1	1	2	2	2	2	2	2	2	2	2	2	3
1	2	3	4	5	6	7	8	9	0	1	2	3	4	5	6	7	8	9	0	1	2	3	4	5	6	7	8	9	0	1	2	3	4	5	6	7	8	9	0	1	2	3	4	5	6	7	8	9	0
bog175	T	T	T	T	T	T	T	T	G	C	T	G	T	G	C	T	G	C	G	C	T	T	T	G	T	T	T	G	T	G	T	T	T	T	T	C	T	C	T	T	C	A	A	T	T	G	A	G	T
pse139	T	T	T	T	T	T	T	T	G	C	T	G	T	G	C	T	G	C	G	C	T	T	T	G	T	T	T	G	T	G	T	T	T	T	T	C	T	C	T	T	C	A	A	T	T	G	A	G	T
pseFB	T	T	T	T	T	T	T	T	G	C	T	G	T	G	C	T	G	C	G	C	T	T	T	G	T	T	T	G	T	G	T	T	T	T	T	C	T	C	T	T	C	A	A	T	T	G	A	G	T
	169	170	171	172	173	174	175	176	177	178	179	180	181	182	183	184	185	186	187	188	189	190	191	192	193	194	195	196	197	198	199	200	201	202	203	204	205	206	207	208	209	210	211	212	213	214	215	216	217
																																							1	1	1	1	1	1	1	1	1	1	1
9	9	9	9	9	9	9	9	9	9	9	9	9	9	9	9	9	9	9	9	9	9	9	9	9	9	9	9	9	9	9	9	9	9	9	9	9	9	9	0	0	0	0	0	0	0	0	0	0	0
6	6	6	6	6	6	6	6	6	7	7	7	7	7	7	7	7	7	7	8	8	8	8	8	8	8	8	8	8	9	9	9	9	9	9	9	9	9	9	0	0	0	0	0	0	0	0	0	0	1
1	2	3	4	5	6	7	8	9	0	1	2	3	4	5	6	7	8	9	0	1	2	3	4	5	6	7	8	9	0	1	2	3	4	5	6	7	8	9	0	1	2	3	4	5	6	7	8	9	0
bog175	C	C	G	G	T	C	G	T	C	C	A	G	C	C	G	C	C	G	C	A	C	T	C	A	C	A	A	A	C	A	G	C	A	A	G	C	T	G	T	G	T	G	T	G	C	T	A	G	C
pse139	C	C	G	G	T	C	G	T	C	C	A	G	C	C	G	C	C	G	C	A	C	T	C	A	C	A	A	A	C	A	G	C	A	A	G	C	T	G	T	G	T	G	T	G	C	T	A	G	C
pseFB	C	C	G	G	T	C	G	T	C	C	C	G	C	C	G	C	C	G	C	A	C	T	C	A	C	A	A	A	C	A	G	C	A	A	G	C	T	G	T	G	T	G	T	G	C	T	A	G	C
	249	250	251	252	253	254	255	256	257	258	259	260	261	262	263	264	265	266	267	268	269	270	271	272	273	274	275	276	277	278	279	280	281	282	283	284	285	286	287	288	289	290	291	292	293	294	295	296	297
1	1	1	1	1	1	1	1	1	1	1	1	1	1	1	1	1	1	1	1	1	1	1	1	1	1	1	1	1	1	1	1	1	1	1	1	1	1	1	1	1	1	1	1	1	1	1	1	1	1
0	0	0	0	0	0	0	0	0	0	0	0	0	0	0	0	0	0	0	0	0	0	0	0	0	0	0	0	0	0	0	0	0	0	0	0	0	0	0	0	0	0	0	0	0	0	0	0	0	0
4	4	4	4	4	4	4	4	4	5	5	5	5	5	5	5	5	5	5	6	6	6	6	6	6	6	6	6	6	7	7	7	7	7	7	7	7	7	7	8	8	8	8	8	8	8	8	8	8	9
1	2	3	4	5	6	7	8	9	0	1	2	3	4	5	6	7	8	9	0	1	2	3	4	5	6	7	8	9	0	1	2	3	4	5	6	7	8	9	0	1	2	3	4	5	6	7	8	9	0
bog175	C	G	T	G	T	C	A	A	A	G	G	T	G	C	G	T	C	T	G	A	T	A	A	G	G	C	T	C	A	A	G	T	G	G	A	C	T	C	G	A	A	T	C	A	A	G	G	G	G
pse139	C	G	T	G	T	C	A	A	A	G	G	T	G	C	G	T	C	T	G	A	T	A	A	G	G	C	T	C	A	A	G	T	G	G	A	C	T	C	G	A	A	T	C	A	A	G	G	G	G
pseFB	C	G	T	G	T	C	A	A	A	G	G	T	G	C	G	T	C	T	G	A	T	A	A	G	G	C	T	C	A	A	G	T	G	G	A	C	T	C	G	A	A	T	C	A	A	G	G	G	G
	329	330	331	332	333	334	335	336	337	338	339	340	341	342	343	344	345	346	347	348	349	350	351	352	353	354	355	356	357	358	359	360	361	362	363	364	365	366	367	368	369	370	371	372	373	374	375	376	377
											INTRON-->
1	1	1	1	1	1	1	1	1	1	1	1	1	1	1	1	1	1	1	1	1	1	1	1	1	1	1	1	1	1	1	1	1	1	1	1	1	1	1	1	1	1	1	1	1	1	1	1	1	1
1	1	1	1	1	1	1	1	1	1	1	1	1	1	1	1	1	1	1	1	1	1	1	1	1	1	1	1	1	1	1	1	1	1	1	1	1	1	1	1	1	1	1	1	1	1	1	1	1	1
2	2	2	2	2	2	2	2	2	3	3	3	3	3	3	3	3	3	3	4	4	4	4	4	4	4	4	4	4	5	5	5	5	5	5	5	5	5	5	6	6	6	6	6	6	6	6	6	6	7
1	2	3	4	5	6	7	8	9	0	1	2	3	4	5	6	7	8	9	0	1	2	3	4	5	6	7	8	9	0	1	2	3	4	5	6	7	8	9	0	1	2	3	4	5	6	7	8	9	0
bog175	A	T	T	G	C	A	T	G	T	T	C	T	A	A	A	A	C	A	T	T	T	A	C	C	A	T	G	A	T	G	T	T	C	G	T	G	A	G	T	G	A	T	G	T	T	A	A	C	A
pse139	A	T	T	G	C	A	T	G	T	T	C	T	A	A	A	A	C	A	T	T	T	A	C	C	A	T	G	A	T	G	T	T	C	G	T	G	A	G	T	G	A	T	G	T	T	A	A	C	A
pseFB	A	T	T	G	C	A	T	G	T	T	C	T	A	A	A	A	C	A	T	T	T	A	C	C	A	T	G	A	T	G	T	T	C	G	T	G	A	G	T	G	A	T	G	T	T	A	A	C	A
	409	410	411	412	413	414	415	416	417	418	419	420	421	422	423	424	425	426	427	428	429	430	431	432	433	434	435	436	437	438	439	440	441	442	443	444	445	446	447	448	449	450	451	452	453	454	455	456	457
1	1	1	1	1	1	1	1	1	1	1	1	1	1	1	1	1	1	1	1	1	1	1	1	1	1	1	1	1	1	1	1	1	1	1	1	1	1	1	1	1	1	1	1	1	1	1	1	1	1
2	2	2	2	2	2	2	2	2	2	2	2	2	2	2	2	2	2	2	2	2	2	2	2	2	2	2	2	2	2	2	2	2	2	2	2	2	2	2	2	2	2	2	2	2	2	2	2	2	2
0	0	0	0	0	0	0	0	0	1	1	1	1	1	1	1	1	1	1	2	2	2	2	2	2	2	2	2	2	3	3	3	3	3	3	3	3	3	3	4	4	4	4	4	4	4	4	4	4	5
1	2	3	4	5	6	7	8	9	0	1	2	3	4	5	6	7	8	9	0	1	2	3	4	5	6	7	8	9	0	1	2	3	4	5	6	7	8	9	0	1	2	3	4	5	6	7	8	9	0
bog175	C	C	T	T	T	T	C	C	A	T	A	G	A	A	A	G	T	T	G	T	T	G	T	G	T	T	T	C	G	G	A	G	C	G	A	T	C	G	C	A	T	C	A	C	C	A	G	T	C
pse139	C	C	T	T	T	T	C	C	A	T	A	G	A	A	A	G	T	T	G	T	T	G	T	G	T	T	T	C	G	G	A	G	C	G	A	T	C	G	C	A	T	C	A	C	C	A	G	T	C
pseFB	C	C	T	T	T	T	C	C	A	T	A	G	A	A	A	G	T	T	G	T	T	G	T	G	T	T	T	C	G	G	A	G	C	G	A	T	C	G	C	A	T	C	A	C	C	A	G	T	C
	489	490	491	492	493	494	495	496	497	498	499	500	501	502	503	504	505	506	507	508	509	510	511	512	513	514	515	516	517	518	519	520	521	522	523	524	525	526	527	528	529	530	531	532	533	534	535	536	537
1	1	1	1	1	1	1	1	1	1	1	1	1	1	1	1	1	1	1	1	1	1	1	1	1	1	1	1	1	1	1	1	1	1	1	1	1	1	1	1	1	1	1	1	1	1	1	1	1	1
2	2	2	2	2	2	2	2	2	2	2	2	2	2	2	2	2	2	2	3	3	3	3	3	3	3	3	3	3	3	3	3	3	3	3	3	3	3	3	3	3	3	3	3	3	3	3	3	3	3
8	8	8	8	8	8	8	8	8	9	9	9	9	9	9	9	9	9	9	0	0	0	0	0	0	0	0	0	0	1	1	1	1	1	1	1	1	1	1	2	2	2	2	2	2	2	2	2	2	3
1	2	3	4	5	6	7	8	9	0	1	2	3	4	5	6	7	8	9	0	1	2	3	4	5	6	7	8	9	0	1	2	3	4	5	6	7	8	9	0	1	2	3	4	5	6	7	8	9	0
bog175	C	T	G	T	C	A	A	T	A	T	C	A	A	T	A	T	C	A	T	T	A	T	G	A	A	T	C	T	C	A	A	C	T	A	G	G	C	T	T	T	C	G	A	T	G	C	T	T	C
pse139	C	T	G	T	C	A	A	T	A	T	C	A	A	T	A	T	C	A	T	T	A	T	G	A	A	T	C	T	C	A	A	C	T	A	G	G	C	T	T	T	C	G	A	T	G	C	T	T	C
pseFB	C	T	G	T	C	A	A	T	A	T	C	A	A	T	A	T	C	A	T	T	A	T	G	A	A	T	C	T	C	A	A	C	T	A	G	G	C	T	T	T	C	G	A	T	G	C	T	T	C
	569	570	571	572	573	574	575	576	577	578	579	580	581	582	583	584	585	586	587	588	589	590	591	592	593	594	595	596	597	598	599	600	601	602	603	604	605	606	607	608	609	610	611	612	613	614	615	616	617
1	1	1	1	1	1	1	1	1	1	1	1	1	1	1	1	1	1	1	1	1	1	1	1	1	1	1	1	1	1	1	1	1	1	1	1	1	1	1	1	1	1	1	1	1	1	1	1	1	1
3	3	3	3	3	3	3	3	3	3	3	3	3	3	3	3	3	3	3	3	3	3	3	3	3	3	3	3	3	3	3	3	3	3	3	3	3	3	3	4	4	4	4	4	4	4	4	4	4	4
6	6	6	6	6	6	6	6	6	7	7	7	7	7	7	7	7	7	7	8	8	8	8	8	8	8	8	8	8	9	9	9	9	9	9	9	9	9	9	0	0	0	0	0	0	0	0	0	0	1
1	2	3	4	5	6	7	8	9	0	1	2	3	4	5	6	7	8	9	0	1	2	3	4	5	6	7	8	9	0	1	2	3	4	5	6	7	8	9	0	1	2	3	4	5	6	7	8	9	0
bog175	A	G	A	G	T	C	T	G	A	C	A	A	A	A	T	T	C	C	A	G	C	A	A	T	A	T	T	T	C	A	T	C	T	G	C	T	G	G	A	G	A	G	A	C	A	G	A	T	C
pse139	A	G	A	G	T	C	T	G	A	C	A	A	A	A	T	T	C	C	A	G	C	A	A	T	A	T	T	T	C	A	T	C	T	G	C	T	G	G	A	G	A	G	A	C	A	G	A	T	C
pseFB	A	G	A	G	T	C	T	G	A	C	A	A	A	A	T	T	C	C	A	G	C	A	A	T	A	T	T	T	C	A	T	C	T	G	C	T	G	G	A	G	A	G	A	C	A	G	A	T	C
	649	650	651	652	653	654	655	656	657	658	659	660	661	662	663	664	665	666	667	668	669	670	671	672	673	674	675	676	677	678	679	680	681	682	683	684	685	686	687	688	689	690	691	692	693	694	695	696	697
1	1	1	1	1	1	1	1	1	1	1	1	1	1	1	1	1	1	1	1	1	1	1	1	1	1	1	1	1	1	1	1	1	1	1	1	1	1	1	1	1	1	1	1	1	1	1	1	1	1
4	4	4	4	4	4	4	4	4	4	4	4	4	4	4	4	4	4	4	4	4	4	4	4	4	4	4	4	4	4	4	4	4	4	4	4	4	4	4	4	4	4	4	4	4	4	4	4	4	4
4	4	4	4	4	4	4	4	4	5	5	5	5	5	5	5	5	5	5	6	6	6	6	6	6	6	6	6	6	7	7	7	7	7	7	7	7	7	7	8	8	8	8	8	8	8	8	8	8	9
1	2	3	4	5	6	7	8	9	0	1	2	3	4	5	6	7	8	9	0	1	2	3	4	5	6	7	8	9	0	1	2	3	4	5	6	7	8	9	0	1	2	3	4	5	6	7	8	9	0
bog175	T	T	G	G	T	T	A	C	T	T	C	T	G	A	C	A	T	A	G	G	T	G	C	T	C	C	G	T	T	A	T	C	A	G	T	G	G	C	A	G	G	T	T	G	G	T	T	G	C
pse139	T	T	G	G	T	T	A	C	T	T	C	T	G	A	C	A	T	A	G	G	T	G	C	T	C	C	G	T	T	A	T	C	A	G	T	G	G	C	A	G	G	T	T	G	G	T	T	G	C
pseFB	T	T	G	G	T	T	A	C	T	T	C	T	G	A	C	A	T	A	G	G	T	G	C	T	C	C	G	T	T	A	T	C	A	G	T	G	G	C	A	G	G	T	T	G	G	T	T	G	C
	729	730	731	732	733	734	735	736	737	738	739	740	741	742	743	744	745	746	747	748	749	750	751	752	753	754	755	756	757	758	759	760	761	762	763	764	765	766	767	768	769	770	771	772	773	774	775	776	777
1	1	1	1	1	1	1	1	1	1	1	1	1	1	1	1	1	1	1	1	1	1	1	1	1	1	1	1	1	1	1	1	1	1	1	1	1	1	1	1	1	1	1	1	1	1	1	1	1	1
5	5	5	5	5	5	5	5	5	5	5	5	5	5	5	5	5	5	5	5	5	5	5	5	5	5	5	5	5	5	5	5	5	5	5	5	5	5	5	5	5	5	5	5	5	5	5	5	5	5
2	2	2	2	2	2	2	2	2	3	3	3	3	3	3	3	3	3	3	4	4	4	4	4	4	4	4	4	4	5	5	5	5	5	5	5	5	5	5	6	6	6	6	6	6	6	6	6	6	7
1	2	3	4	5	6	7	8	9	0	1	2	3	4	5	6	7	8	9	0	1	2	3	4	5	6	7	8	9	0	1	2	3	4	5	6	7	8	9	0	1	2	3	4	5	6	7	8	9	0
bog175	T	G	C	T	T	G	A	T	A	T	C	A	G	A	T	A	T	A	C	G	A	A	A	A	A	A	C	A	C	C	G	A	A	A	A	C	A	T	G	C	C	G	T	G	T	C	T	T	T
pse139	T	G	C	T	T	G	A	T	A	T	C	A	G	A	T	A	T	A	C	G	A	A	A	A	A	A	C	A	C	C	G	A	A	A	A	C	A	T	G	C	C	G	T	G	T	C	T	T	T
pseFB	T	G	C	T	T	G	A	T	A	T	C	A	G	A	T	A	T	A	C	G	A	A	A	A	A	A	C	A	C	C	G	A	A	A	A	C	A	T	G	C	C	G	T	G	T	C	T	T	T
	809	810	811	812	813	814	815	816	817	818	819	820	821	822	823	824	825	826	827	828	829	830	831	832	833	834	835	836	837	838	839	840	841	842	843	844	845	846	847	848	849	850	851	852	853	854	855	856	857
1	1	1	1	1	1	1	1	1	1	1	1	1	1	1	1	1	1	1	1	1	1	1	1	1	1	1	1	1	1	1	1	1	1	1	1	1	1	1	1	1	1	1	1	1	1	1	1	1	1
6	6	6	6	6	6	6	6	6	6	6	6	6	6	6	6	6	6	6	6	6	6	6	6	6	6	6	6	6	6	6	6	6	6	6	6	6	6	6	6	6	6	6	6	6	6	6	6	6	6
0	0	0	0	0	0	0	0	0	1	1	1	1	1	1	1	1	1	1	2	2	2	2	2	2	2	2	2	2	3	3	3	3	3	3	3	3	3	3	4	4	4	4	4	4	4	4	4	4	5
1	2	3	4	5	6	7	8	9	0	1	2	3	4	5	6	7	8	9	0	1	2	3	4	5	6	7	8	9	0	1	2	3	4	5	6	7	8	9	0	1	2	3	4	5	6	7	8	9	0
bog175	G	C	A	A	A	C	G	G	A	A	T	G	C	C	C	G	G	A	G	T	G	A	A	T	C	G	T	G	A	A	T	C	A	G	T	G	A	A	T	C	A	G	G	A	A	G	T	C	G
pse139	G	C	A	A	A	C	G	G	A	A	T	G	C	C	C	G	G	A	G	T	G	A	A	T	C	G	T	G	A	A	T	C	A	G	T	G	A	A	T	C	A	G	G	A	A	G	T	C	G
pseFB	G	C	A	A	A	C	G	G	A	A	T	G	C	C	C	G	G	A	G	T	G	A	A	T	C	G	T	G	A	A	T	C	A	G	T	G	A	A	T	C	A	G	G	A	A	G	T	C	G
	889	890	891	892	893	894	895	896	897	898	899	900	901	902	903	904	905	906	907	908	909	910	911	912	913	914	915	916	917	918	919	920	921	922	923	924	925	926	927	928	929	930	931	932	933	934	935	936	937
1	1	1	1	1	1	1	1	1	1	1	1	1	1	1	1	1	1	1	1	1	1	1	1	1	1	1	1	1	1	1	1	1	1	1	1	1	1	1	1	1	1	1	1	1	1	1	1	1	1
6	6	6	6	6	6	6	6	6	6	6	6	6	6	6	6	6	6	6	7	7	7	7	7	7	7	7	7	7	7	7	7	7	7	7	7	7	7	7	7	7	7	7	7	7	7	7	7	7	7
8	8	8	8	8	8	8	8	8	9	9	9	9	9	9	9	9	9	9	0	0	0	0	0	0	0	0	0	0	1	1	1	1	1	1	1	1	1	1	2	2	2	2	2	2	2	2	2	2	3
1	2	3	4	5	6	7	8	9	0	1	2	3	4	5	6	7	8	9	0	1	2	3	4	5	6	7	8	9	0	1	2	3	4	5	6	7	8	9	0	1	2	3	4	5	6	7	8	9	0
bog175	T	G	A	A	A	T	G	G	T	T	T	T	T	C	A	C	C	T	G	T	T	T	T	C	C	C	C	C	A	C	T	T	C	T	G	T	T	G	T	A	G	T	G	T	A	A	T	T	C
pse139	T	G	A	A	A	T	G	G	T	T	T	T	T	C	A	C	C	T	G	T	T	T	T	C	C	C	C	C	A	C	T	T	C	T	G	T	T	G	T	A	G	T	G	T	A	A	T	T	C
pseFB	T	G	A	A	A	T	G	G	T	T	T	T	T	C	A	C	C	T	G	T	T	T	T	C	C	C	C	C	A	C	T	T	C	T	G	T	T	G	T	A	G	T	G	T	A	A	T	T	C
	969	970	971	972	973	974	975	976	977	978	979	980	981	982	983	984	985	986	987	988	989	990	991	992	993	994	995	996	997	998	999	1000	1001	1002	1003	1004	1005	1006	1007	1008	1009	1010	1011	1012	1013	1014	1015	1016	1017
1	1	1	1	1	1	1	1	1	1	1	1	1	1	1	1	1	1	1	1	1	1	1	1	1	1	1	1	1	1	1	1	1	1	1	1	1	1	1	1	1	1	1	1	1	1	1	1	1	1
7	7	7	7	7	7	7	7	7	7	7	7	7	7	7	7	7	7	7	7	7	7	7	7	7	7	7	7	7	7	7	7	7	7	7	7	7	7	7	8	8	8	8	8	8	8	8	8	8	8
6	6	6	6	6	6	6	6	6	7	7	7	7	7	7	7	7	7	7	8	8	8	8	8	8	8	8	8	8	9	9	9	9	9	9	9	9	9	9	0	0	0	0	0	0	0	0	0	0	1
1	2	3	4	5	6	7	8	9	0	1	2	3	4	5	6	7	8	9	0	1	2	3	4	5	6	7	8	9	0	1	2	3	4	5	6	7	8	9	0	1	2	3	4	5	6	7	8	9	0
bog175	C	G	T	A	A	T	C	A	G	C	T	G	T	A	A	G	A	C	G	A	T	C	T	C	T	C	A	A	T	G	C	T	G	T	G	C	C	C	T	A	A	A	C	A	A	A	A	G	C
pse139	C	G	T	A	A	T	C	A	G	C	T	G	T	A	A	G	A	C	G	A	T	C	T	C	T	C	A	A	T	G	C	T	G	T	G	C	C	C	T	A	A	A	C	A	A	A	A	G	C
pseFB	C	G	T	A	A	T	C	A	G	C	T	G	T	A	A	G	A	C	G	A	T	C	T	C	T	C	A	A	T	G	C	T	G	T	G	C	C	C	T	A	A	A	C	A	A	A	A	G	C
	1049	1050	1051	1052	1053	1054	1055	1056	1057	1058	1059	1060	1061	1062	1063	1064	1065	1066	1067	1068	1069	1070	1071	1072	1073	1074	1075	1076	1077	1078	1079	1080	1081	1082	1083	1084	1085	1086	1087	1088	1089	1090	1091	1092	1093	1094	1095	1096	1097
1	1	1	1	1	1	1	1	1	1	1	1	1	1	1	1	1	1	1	1	1	1	1	1	1	1	1	1	1	1	1	1	1	1	1	1	1	1	1	1	1	1	1	1	1	1	1	1	1	1
8	8	8	8	8	8	8	8	8	8	8	8	8	8	8	8	8	8	8	8	8	8	8	8	8	8	8	8	8	8	8	8	8	8	8	8	8	8	8	8	8	8	8	8	8	8	8	8	8	8
4	4	4	4	4	4	4	4	4	5	5	5	5	5	5	5	5	5	5	6	6	6	6	6	6	6	6	6	6	7	7	7	7	7	7	7	7	7	7	8	8	8	8	8	8	8	8	8	8	9
1	2	3	4	5	6	7	8	9	0	1	2	3	4	5	6	7	8	9	0	1	2	3	4	5	6	7	8	9	0	1	2	3	4	5	6	7	8	9	0	1	2	3	4	5	6	7	8	9	0
bog175	T	C	T	C	C	A	C	T	T	T	T	C	C	C	A	C	A	G	C	A	G	A	T	T	T	G	C	A	T	T	C	C	C	A	T	T	T	T	C	A	A	T	A	T	A	T	T	T	T
pse139	T	C	T	C	C	A	C	T	T	T	T	C	C	C	A	C	A	G	C	A	G	A	T	T	T	G	C	A	T	T	C	C	C	A	T	T	T	T	C	W	A	T	A	T	A	T	T	T	T
pseFB	T	C	T	C	C	A	C	T	T	T	T	C	C	C	A	C	A	G	C	A	G	A	T	T	T	G	C	A	T	T	C	C	C	A	T	T	T	T	C	T	A	T	A	T	A	T	T	T	T
	1129	1130	1131	1132	1133	1134	1135	1136	1137	1138	1139	1140	1141	1142	1143	1144	1145	1146	1147	1148	1149	1150	1151	1152	1153	1154	1155	1156	1157	1158	1159	1160	1161	1162	1163	1164	1165	1166	1167	1168	1169	1170	1171	1172	1173	1174	1175	1176	1177
1	1	1	1	1	1	1	1	1	1	1	1	1	1	1	1	1	1	1	1	1	1	1	1	1	1	1	1	1	1	1	1	1	1	1	1	1	1	1	1	1	1	1	1	1	1	1	1	1	1
9	9	9	9	9	9	9	9	9	9	9	9	9	9	9	9	9	9	9	9	9	9	9	9	9	9	9	9	9	9	9	9	9	9	9	9	9	9	9	9	9	9	9	9	9	9	9	9	9	9
2	2	2	2	2	2	2	2	2	3	3	3	3	3	3	3	3	3	3	4	4	4	4	4	4	4	4	4	4	5	5	5	5	5	5	5	5	5	5	6	6	6	6	6	6	6	6	6	6	7
1	2	3	4	5	6	7	8	9	0	1	2	3	4	5	6	7	8	9	0	1	2	3	4	5	6	7	8	9	0	1	2	3	4	5	6	7	8	9	0	1	2	3	4	5	6	7	8	9	0
bog175	A	T	T	A	C	G	G	T	G	T	C	A	T	C	C	A	G	A	T	G	T	C	T	A	G	A	C	G	T	C	A	G	G	T	C	G	G	C	C	T	G	T	G	G	T	T	A	G	C
pse139	A	T	T	A	C	G	G	T	G	T	C	A	T	C	C	A	G	A	T	G	T	C	T	A	G	A	C	G	T	C	A	G	G	T	C	G	G	C	C	T	G	C	T	G	T	T	A	G	C
pseFB	A	T	T	A	C	G	G	T	G	T	C	A	T	C	C	A	G	A	T	G	T	C	T	A	G	A	C	G	T	C	A	G	G	T	C	G	G	C	C	T	G	C	T	G	T	T	A	G	C
	1209	1210	1211	1212	1213	1214	1215	1216	1217	1218	1219	1220	1221	1222	1223	1224	1225	1226	1227	1228	1229	1230	1231	1232	1233	1234	1235	1236	1237	1238	1239	1240	1241	1242	1243	1244	1245	1246	1247	1248	1249	1250	1251	1252	1253	1254	1255	1256	1257
2	2	2	2	2	2	2	2	2	2	2	2	2	2	2	2	2	2	2	2	2	2	2	2	2	2	2	2	2	2	2	2	2	2	2	2	2	2	2	2	2	2	2	2	2	2	2	2	2	2
0	0	0	0	0	0	0	0	0	0	0	0	0	0	0	0	0	0	0	0	0	0	0	0	0	0	0	0	0	0	0	0	0	0	0	0	0	0	0	0	0	0	0	0	0	0	0	0	0	0
0	0	0	0	0	0	0	0	0	1	1	1	1	1	1	1	1	1	1	2	2	2	2	2	2	2	2	2	2	3	3	3	3	3	3	3	3	3	3	4	4	4	4	4	4	4	4	4	4	5
1	2	3	4	5	6	7	8	9	0	1	2	3	4	5	6	7	8	9	0	1	2	3	4	5	6	7	8	9	0	1	2	3	4	5	6	7	8	9	0	1	2	3	4	5	6	7	8	9	0
bog175	A	A	T	A	C	A	G	C	A	A	G	C	G	A	G	G	G	T	A	T	G	T	G	C	C	T	G	C	C	A	C	A	T	T	C	C	T	T	A	T	T	T	T	G	T	G	G	C	A
pse139	A	A	C	A	C	A	G	C	A	A	G	C	G	A	G	G	G	T	A	T	G	T	G	C	C	T	G	C	C	A	C	A	T	T	C	C	T	T	A	T	T	T	T	G	T	G	G	C	A
pseFB	A	A	C	A	C	A	G	C	A	A	G	C	G	A	G	G	G	T	A	T	G	T	G	C	C	T	G	C	C	A	C	A	T	T	C	C	T	T	A	T	T	T	T	G	T	G	G	C	A
	1289	1290	1291	1292	1293	1294	1295	1296	1297	1298	1299	1300	1301	1302	1303	1304	1305	1306	1307	1308	1309	1310	1311	1312	1313	1314	1315	1316	1317	1318	1319	1320	1321	1322	1323	1324	1325	1326	1327	1328	1329	1330	1331	1332	1333	1334	1335	1336	1337
2	2	2	2	2	2	2	2	2	2	2	2	2	2	2	2	2	2	2	2	2	2	2	2	2	2	2	2	2	2	2	2	2	2	2	2	2	2	2	2	2	2	2	2	2	2	2	2	2	2
0	0	0	0	0	0	0	0	0	0	0	0	0	0	0	0	0	0	0	1	1	1	1	1	1	1	1	1	1	1	1	1	1	1	1	1	1	1	1	1	1	1	1	1	1	1	1	1	1	1
8	8	8	8	8	8	8	8	8	9	9	9	9	9	9	9	9	9	9	0	0	0	0	0	0	0	0	0	0	1	1	1	1	1	1	1	1	1	1	2	2	2	2	2	2	2	2	2	2	3
1	2	3	4	5	6	7	8	9	0	1	2	3	4	5	6	7	8	9	0	1	2	3	4	5	6	7	8	9	0	1	2	3	4	5	6	7	8	9	0	1	2	3	4	5	6	7	8	9	0
bog175	A	A	G	G	C	G	A	A	G	A	A	T	G	C	A	T	G	G	T	G	A	A	G	G	A	G	A	A	C	T	T	G	C	C	G	G	G	C	A	T	C	T	G	C	C	G	C	C	C
pse139	A	A	G	G	C	G	A	A	G	A	A	T	G	C	A	T	G	G	T	G	A	A	G	G	A	G	A	A	Y	T	T	S	C	C	G	G	G	C	A	T	C	T	G	C	C	G	C	C	C
pseFB	A	A	G	G	C	G	A	A	G	A	A	T	G	C	A	T	G	G	T	G	A	A	G	G	A	G	A	A	C	T	T	G	C	C	G	G	G	C	A	T	C	T	G	C	C	G	C	C	C
	1369	1370	1371	1372	1373	1374	1375	1376	1377	1378	1379	1380	1381	1382	1383	1384	1385	1386	1387	1388	1389	1390	1391	1392	1393	1394	1395	1396	1397	1398	1399	1400	1401	1402	1403	1404	1405	1406	1407	1408	1409	1410	1411	1412	1413	1414	1415	1416	1417
2	2	2	2	2	2	2	2	2	2	2	2	2	2	2	2	2	2	2	2	2	2	2	2	2	2	2	2	2	2	2	2	2	2	2	2	2	2	2	2	2	2	2	2	2	2	2	2	2	2
1	1	1	1	1	1	1	1	1	1	1	1	1	1	1	1	1	1	1	1	1	1	1	1	1	1	1	1	1	1	1	1	1	1	1	1	1	1	1	2	2	2	2	2	2	2	2	2	2	2
6	6	6	6	6	6	6	6	6	7	7	7	7	7	7	7	7	7	7	8	8	8	8	8	8	8	8	8	8	9	9	9	9	9	9	9	9	9	9	0	0	0	0	0	0	0	0	0	0	1
1	2	3	4	5	6	7	8	9	0	1	2	3	4	5	6	7	8	9	0	1	2	3	4	5	6	7	8	9	0	1	2	3	4	5	6	7	8	9	0	1	2	3	4	5	6	7	8	9	0
bog175	T	A	C	A	T	C	A	A	G	T	C	G	G	G	A	A	T	C	C	T	C	T	C	C	A	T	C	A	A	C	G	A	T	G	T	C	C	C	C	A	G	C	T	G	C	G	G	C	C
pse139	T	A	C	A	T	C	A	A	G	T	C	G	G	G	A	A	T	C	C	T	C	T	C	C	A	T	C	A	A	C	G	A	T	G	T	C	C	C	C	A	G	C	T	G	C	G	G	C	C
pseFB	T	A	C	A	T	C	A	A	G	T	C	G	G	G	A	A	T	C	C	T	C	T	C	C	A	T	C	A	A	C	G	A	T	G	T	C	C	C	C	A	G	C	T	G	C	G	G	C	C
	1449	1450	1451	1452	1453	1454	1455	1456	1457	1458	1459	1460	1461	1462	1463	1464	1465	1466	1467	1468	1469	1470	1471	1472	1473	1474	1475	1476	1477	1478	1479	1480	1481	1482	1483	1484	1485	1486	1487	1488	1489	1490	1491	1492	1493	1494	1495	1496	1497
2	2	2	2	2	2	2	2	2	2	2	2	2	2	2	2	2	2	2	2	2	2	2	2	2	2	2	2	2	2	2	2	2	2	2	2	2	2	2	2	2	2	2	2	2	2	2	2	2	2
2	2	2	2	2	2	2	2	2	2	2	2	2	2	2	2	2	2	2	2	2	2	2	2	2	2	2	2	2	2	2	2	2	2	2	2	2	2	2	2	2	2	2	2	2	2	2	2	2	2
4	4	4	4	4	4	4	4	4	5	5	5	5	5	5	5	5	5	5	6	6	6	6	6	6	6	6	6	6	7	7	7	7	7	7	7	7	7	7	8	8	8	8	8	8	8	8	8	8	9
1	2	3	4	5	6	7	8	9	0	1	2	3	4	5	6	7	8	9	0	1	2	3	4	5	6	7	8	9	0	1	2	3	4	5	6	7	8	9	0	1	2	3	4	5	6	7	8	9	0
bog175	C	A	C	G	A	A	G	C	C	C	T	G	C	T	G	C	C	C	C	A	A	T	G	A	G	T	A	A	G	C	C	A	A	G	T	T	G	C	C	T	C	C	T	G	A	G	T	G	T
pse139	C	A	C	G	A	A	G	C	C	C	T	G	C	T	G	C	C	C	C	A	A	T	G	A	G	T	A	A	G	C	C	A	A	G	T	T	G	C	C	T	C	C	T	G	A	G	T	G	T
pseFB	C	A	C	G	A	A	G	C	C	C	T	G	C	T	G	C	C	C	C	A	A	T	G	A	G	T	A	A	G	C	C	A	A	G	T	T	G	C	C	T	C	C	T	G	A	G	T	G	T
	1529	1530	1531	1532	1533	1534	1535	1536	1537	1538	1539	1540	1541	1542	1543	1544	1545	1546	1547	1548	1549	1550	1551	1552	1553	1554	1555	1556	1557	1558	1559	1560	1561	1562	1563	1564	1565	1566	1567	1568	1569	1570	1571	1572	1573	1574	1575	1576	1577
[truncated: 31 more columns]

## Sheet: GA20504
GA20504 (-1063>+659)
									1	1	1	1	1	1	1	1	1	1	2	2	2	2	2	2	2	2	2	2	3	3	3	3	3	3	3	3	3	3	4	4	4	4	4	4	4	4	4	4	5
1	2	3	4	5	6	7	8	9	0	1	2	3	4	5	6	7	8	9	0	1	2	3	4	5	6	7	8	9	0	1	2	3	4	5	6	7	8	9	0	1	2	3	4	5	6	7	8	9	0
bog175	C	G	C	A	A	A	T	C	G	A	C	A	A	A	C	G	C	A	C	G	T	A	G	C	G	T	A	G	C	G	C	A	A	A	A	G	T	T	G	A	A	C	A	A	C	T	T	T	C
pse139	C	G	C	A	A	A	T	C	G	A	C	A	A	A	C	G	C	A	C	G	T	A	G	C	G	T	A	G	C	G	C	A	A	A	A	G	T	T	G	A	A	C	A	A	C	T	T	T	C
Dpse FB	C	G	C	A	A	A	T	C	G	A	C	A	A	A	C	G	C	A	C	G	T	A	G	C	G	T	A	G	C	G	C	A	A	A	A	G	T	T	G	A	A	C	A	A	C	T	T	T	C
	-1063	-1062	-1061	-1060	-1059	-1058	-1057	-1056	-1055	-1054	-1053	-1052	-1051	-1050	-1049	-1048	-1047	-1046	-1045	-1044	-1043	-1042	-1041	-1040	-1039	-1038	-1037	-1036	-1035	-1034	-1033	-1032	-1031	-1030	-1029	-1028	-1027	-1026	-1025	-1024	-1023	-1022	-1021	-1020	-1019	-1018	-1017	-1016	-1015
																			1	1	1	1	1	1	1	1	1	1	1	1	1	1	1	1	1	1	1	1	1	1	1	1	1	1	1	1	1	1	1
8	8	8	8	8	8	8	8	8	9	9	9	9	9	9	9	9	9	9	0	0	0	0	0	0	0	0	0	0	1	1	1	1	1	1	1	1	1	1	2	2	2	2	2	2	2	2	2	2	3
1	2	3	4	5	6	7	8	9	0	1	2	3	4	5	6	7	8	9	0	1	2	3	4	5	6	7	8	9	0	1	2	3	4	5	6	7	8	9	0	1	2	3	4	5	6	7	8	9	0
bog175	A	G	T	A	A	G	T	C	A	A	G	A	C	G	C	T	G	C	T	A	G	G	C	G	A	T	C	T	G	G	G	A	A	T	G	T	A	A	C	T	T	T	T	A	C	T	T	T	T
pse139	A	G	T	A	A	G	T	C	A	A	G	A	C	G	C	T	G	C	T	A	G	G	C	G	A	T	C	T	G	G	G	A	A	T	G	T	A	A	C	T	T	T	T	A	C	T	T	T	T
Dpse FB	A	G	T	A	A	G	T	C	A	A	G	A	C	G	C	T	G	C	T	A	G	G	C	G	A	T	C	T	G	G	G	A	A	T	G	T	A	A	C	T	T	T	T	A	C	T	T	T	T
	-983	-982	-981	-980	-979	-978	-977	-976	-975	-974	-973	-972	-971	-970	-969	-968	-967	-966	-965	-964	-963	-962	-961	-960	-959	-958	-957	-956	-955	-954	-953	-952	-951	-950	-949	-948	-947	-946	-945	-944	-943	-942	-941	-940	-939	-938	-937	-936	-935
1	1	1	1	1	1	1	1	1	1	1	1	1	1	1	1	1	1	1	1	1	1	1	1	1	1	1	1	1	1	1	1	1	1	1	1	1	1	1	2	2	2	2	2	2	2	2	2	2	2
6	6	6	6	6	6	6	6	6	7	7	7	7	7	7	7	7	7	7	8	8	8	8	8	8	8	8	8	8	9	9	9	9	9	9	9	9	9	9	0	0	0	0	0	0	0	0	0	0	1
1	2	3	4	5	6	7	8	9	0	1	2	3	4	5	6	7	8	9	0	1	2	3	4	5	6	7	8	9	0	1	2	3	4	5	6	7	8	9	0	1	2	3	4	5	6	7	8	9	0
bog175	G	C	A	A	A	G	C	C	C	A	G	G	A	T	T	G	T	G	G	A	A	C	G	C	C	G	T	G	A	G	A	A	T	G	G	G	G	G	G	A	T	G	G	G	A	A	T	G	G
pse139	G	C	A	A	A	G	C	C	C	C	G	G	A	T	T	G	T	G	G	A	A	C	G	C	C	G	T	G	A	G	A	A	T	G	G	G	G	G	G	A	T	G	G	G	A	A	T	G	G
Dpse FB	G	C	A	A	A	G	C	C	C	A	G	G	A	T	T	G	T	G	G	A	A	C	G	C	C	G	T	G	A	G	A	A	T	G	G	G	G	G	G	A	T	G	G	G	A	A	T	G	G
	-903	-902	-901	-900	-899	-898	-897	-896	-895	-894	-893	-892	-891	-890	-889	-888	-887	-886	-885	-884	-883	-882	-881	-880	-879	-878	-877	-876	-875	-874	-873	-872	-871	-870	-869	-868	-867	-866	-865	-864	-863	-862	-861	-860	-859	-858	-857	-856	-855
2	2	2	2	2	2	2	2	2	2	2	2	2	2	2	2	2	2	2	2	2	2	2	2	2	2	2	2	2	2	2	2	2	2	2	2	2	2	2	2	2	2	2	2	2	2	2	2	2	2
4	4	4	4	4	4	4	4	4	5	5	5	5	5	5	5	5	5	5	6	6	6	6	6	6	6	6	6	6	7	7	7	7	7	7	7	7	7	7	8	8	8	8	8	8	8	8	8	8	9
1	2	3	4	5	6	7	8	9	0	1	2	3	4	5	6	7	8	9	0	1	2	3	4	5	6	7	8	9	0	1	2	3	4	5	6	7	8	9	0	1	2	3	4	5	6	7	8	9	0
bog175	G	A	T	A	A	C	T	G	T	A	C	C	A	A	T	T	T	A	G	A	T	G	C	A	T	T	T	C	C	A	T	T	G	A	T	T	A	G	A	C	G	G	A	T	G	C	A	G	A
pse139	G	A	T	A	A	C	T	G	T	A	C	C	A	A	T	T	T	A	G	A	T	G	C	A	T	T	T	C	C	A	T	T	G	A	T	T	A	G	A	C	G	G	A	T	G	C	A	G	A
Dpse FB	G	A	T	A	A	C	T	G	T	A	C	C	A	A	T	T	T	A	G	A	T	G	C	A	T	T	T	C	C	A	T	T	G	A	T	T	A	G	A	C	G	G	A	T	G	C	A	G	A
	-823	-822	-821	-820	-819	-818	-817	-816	-815	-814	-813	-812	-811	-810	-809	-808	-807	-806	-805	-804	-803	-802	-801	-800	-799	-798	-797	-796	-795	-794	-793	-792	-791	-790	-789	-788	-787	-786	-785	-784	-783	-782	-781	-780	-779	-778	-777	-776	-775
3	3	3	3	3	3	3	3	3	3	3	3	3	3	3	3	3	3	3	3	3	3	3	3	3	3	3	3	3	3	3	3	3	3	3	3	3	3	3	3	3	3	3	3	3	3	3	3	3	3
2	2	2	2	2	2	2	2	2	3	3	3	3	3	3	3	3	3	3	4	4	4	4	4	4	4	4	4	4	5	5	5	5	5	5	5	5	5	5	6	6	6	6	6	6	6	6	6	6	7
1	2	3	4	5	6	7	8	9	0	1	2	3	4	5	6	7	8	9	0	1	2	3	4	5	6	7	8	9	0	1	2	3	4	5	6	7	8	9	0	1	2	3	4	5	6	7	8	9	0
bog175	T	C	T	C	C	C	A	T	T	G	A	A	A	A	C	G	T	G	A	C	C	G	A	G	T	T	G	T	G	A	A	T	A	A	G	G	T	G	T	G	C	T	C	T	T	A	C	C	A
pse139	T	C	T	C	C	C	A	T	T	G	A	A	A	A	C	G	T	G	A	C	C	G	A	G	T	T	G	T	G	A	A	T	A	A	G	G	T	G	T	G	C	T	C	T	T	A	C	C	A
Dpse FB	T	C	T	C	C	C	A	T	T	G	A	A	A	A	C	G	T	G	A	C	C	G	A	G	T	T	G	T	G	A	A	T	A	A	G	G	T	G	T	G	C	T	C	T	T	A	C	C	A
	-743	-742	-741	-740	-739	-738	-737	-736	-735	-734	-733	-732	-731	-730	-729	-728	-727	-726	-725	-724	-723	-722	-721	-720	-719	-718	-717	-716	-715	-714	-713	-712	-711	-710	-709	-708	-707	-706	-705	-704	-703	-702	-701	-700	-699	-698	-697	-696	-695
4	4	4	4	4	4	4	4	4	4	4	4	4	4	4	4	4	4	4	4	4	4	4	4	4	4	4	4	4	4	4	4	4	4	4	4	4	4	4	4	4	4	4	4	4	4	4	4	4	4
0	0	0	0	0	0	0	0	0	1	1	1	1	1	1	1	1	1	1	2	2	2	2	2	2	2	2	2	2	3	3	3	3	3	3	3	3	3	3	4	4	4	4	4	4	4	4	4	4	5
1	2	3	4	5	6	7	8	9	0	1	2	3	4	5	6	7	8	9	0	1	2	3	4	5	6	7	8	9	0	1	2	3	4	5	6	7	8	9	0	1	2	3	4	5	6	7	8	9	0
bog175	A	T	A	T	T	T	G	T	T	T	G	G	A	T	G	A	T	C	T	C	C	A	G	C	A	G	A	C	C	A	G	T	G	G	G	C	T	G	T	G	A	A	G	T	C	G	A	A	T
pse139	A	T	A	T	T	T	G	T	T	T	G	G	A	T	G	A	T	C	T	C	C	A	G	C	A	G	A	C	C	A	G	T	G	G	G	C	T	G	T	G	A	A	G	T	C	G	A	A	T
Dpse FB	A	T	A	T	T	T	G	T	T	T	G	G	A	T	G	A	T	C	T	C	C	A	G	C	A	G	A	C	C	A	G	T	G	G	G	C	T	G	T	G	A	A	G	T	C	G	A	A	T
	-663	-662	-661	-660	-659	-658	-657	-656	-655	-654	-653	-652	-651	-650	-649	-648	-647	-646	-645	-644	-643	-642	-641	-640	-639	-638	-637	-636	-635	-634	-633	-632	-631	-630	-629	-628	-627	-626	-625	-624	-623	-622	-621	-620	-619	-618	-617	-616	-615
4	4	4	4	4	4	4	4	4	4	4	4	4	4	4	4	4	4	4	5	5	5	5	5	5	5	5	5	5	5	5	5	5	5	5	5	5	5	5	5	5	5	5	5	5	5	5	5	5	5
8	8	8	8	8	8	8	8	8	9	9	9	9	9	9	9	9	9	9	0	0	0	0	0	0	0	0	0	0	1	1	1	1	1	1	1	1	1	1	2	2	2	2	2	2	2	2	2	2	3
1	2	3	4	5	6	7	8	9	0	1	2	3	4	5	6	7	8	9	0	1	2	3	4	5	6	7	8	9	0	1	2	3	4	5	6	7	8	9	0	1	2	3	4	5	6	7	8	9	0
bog175	A	T	A	C	T	C	A	A	A	A	A	A	C	T	C	G	A	A	G	T	A	A	G	C	A	A	A	T	G	T	T	G	A	A	T	A	T	C	A	A	T	C	G	A	C	T	G	C	T
pse139	A	T	A	C	T	C	A	A	A	A	A	A	C	T	C	G	A	A	G	T	A	A	G	C	A	A	A	T	G	T	T	G	A	A	T	A	T	C	A	A	T	C	G	A	C	T	G	C	T
Dpse FB	A	T	A	C	T	C	A	A	A	A	A	A	C	T	C	G	A	A	G	T	A	A	G	C	A	A	A	T	G	T	T	G	A	A	T	A	T	C	A	A	T	C	G	A	C	T	G	C	T
	-583	-582	-581	-580	-579	-578	-577	-576	-575	-574	-573	-572	-571	-570	-569	-568	-567	-566	-565	-564	-563	-562	-561	-560	-559	-558	-557	-556	-555	-554	-553	-552	-551	-550	-549	-548	-547	-546	-545	-544	-543	-542	-541	-540	-539	-538	-537	-536	-535
5	5	5	5	5	5	5	5	5	5	5	5	5	5	5	5	5	5	5	5	5	5	5	5	5	5	5	5	5	5	5	5	5	5	5	5	5	5	5	6	6	6	6	6	6	6	6	6	6	6
6	6	6	6	6	6	6	6	6	7	7	7	7	7	7	7	7	7	7	8	8	8	8	8	8	8	8	8	8	9	9	9	9	9	9	9	9	9	9	0	0	0	0	0	0	0	0	0	0	1
1	2	3	4	5	6	7	8	9	0	1	2	3	4	5	6	7	8	9	0	1	2	3	4	5	6	7	8	9	0	1	2	3	4	5	6	7	8	9	0	1	2	3	4	5	6	7	8	9	0
bog175	C	T	C	C	G	G	C	G	A	T	C	A	G	C	C	T	C	C	A	G	G	A	C	C	T	T	G	G	T	G	A	C	G	G	T	A	C	A	A	C	C	T	G	G	A	G	A	T	C
pse139	C	T	C	C	G	G	C	G	A	T	C	A	G	C	C	T	C	C	A	G	G	A	C	C	T	T	G	G	T	G	A	C	G	G	T	A	C	A	A	C	C	T	G	G	A	G	A	T	C
Dpse FB	C	T	C	C	G	G	C	G	A	T	C	A	G	C	C	T	C	C	A	G	G	A	C	C	T	T	G	G	T	G	A	C	G	G	T	A	C	A	A	C	C	T	G	G	A	G	A	T	C
	-503	-502	-501	-500	-499	-498	-497	-496	-495	-494	-493	-492	-491	-490	-489	-488	-487	-486	-485	-484	-483	-482	-481	-480	-479	-478	-477	-476	-475	-474	-473	-472	-471	-470	-469	-468	-467	-466	-465	-464	-463	-462	-461	-460	-459	-458	-457	-456	-455
6	6	6	6	6	6	6	6	6	6	6	6	6	6	6	6	6	6	6	6	6	6	6	6	6	6	6	6	6	6	6	6	6	6	6	6	6	6	6	6	6	6	6	6	6	6	6	6	6	6
4	4	4	4	4	4	4	4	4	5	5	5	5	5	5	5	5	5	5	6	6	6	6	6	6	6	6	6	6	7	7	7	7	7	7	7	7	7	7	8	8	8	8	8	8	8	8	8	8	9
1	2	3	4	5	6	7	8	9	0	1	2	3	4	5	6	7	8	9	0	1	2	3	4	5	6	7	8	9	0	1	2	3	4	5	6	7	8	9	0	1	2	3	4	5	6	7	8	9	0
bog175	A	A	T	C	T	C	T	C	C	T	G	C	A	C	T	G	A	T	G	G	C	A	A	T	C	C	C	G	A	G	A	C	T	G	A	A	T	T	A	A	A	C	A	C	A	C	A	G	T
pse139	A	A	T	C	T	C	T	C	C	T	G	C	A	C	T	G	A	T	G	G	C	A	A	T	C	C	C	G	A	G	A	C	T	G	A	A	T	T	A	A	A	C	A	C	A	C	A	G	T
Dpse FB	C	A	T	C	T	C	T	C	C	T	G	C	A	C	T	G	A	T	G	G	C	A	A	T	C	C	C	G	A	G	A	C	T	G	A	A	T	T	A	A	A	C	T	C	A	G	A	G	T
	-423	-422	-421	-420	-419	-418	-417	-416	-415	-414	-413	-412	-411	-410	-409	-408	-407	-406	-405	-404	-403	-402	-401	-400	-399	-398	-397	-396	-395	-394	-393	-392	-391	-390	-389	-388	-387	-386	-385	-384	-383	-382	-381	-380	-379	-378	-377	-376	-375
7	7	7	7	7	7	7	7	7	7	7	7	7	7	7	7	7	7	7	7	7	7	7	7	7	7	7	7	7	7	7	7	7	7	7	7	7	7	7	7	7	7	7	7	7	7	7	7	7	7
2	2	2	2	2	2	2	2	2	3	3	3	3	3	3	3	3	3	3	4	4	4	4	4	4	4	4	4	4	5	5	5	5	5	5	5	5	5	5	6	6	6	6	6	6	6	6	6	6	7
1	2	3	4	5	6	7	8	9	0	1	2	3	4	5	6	7	8	9	0	1	2	3	4	5	6	7	8	9	0	1	2	3	4	5	6	7	8	9	0	1	2	3	4	5	6	7	8	9	0
bog175	A	T	C	G	C	T	A	A	G	A	G	C	T	A	A	T	T	T	C	G	T	A	G	T	T	C	G	C	A	A	G	C	A	G	C	G	A	G	G	C	T	G	A	G	A	G	A	G	C
pse139	A	T	C	G	C	T	A	A	G	A	G	C	T	A	A	T	T	T	C	G	T	A	G	T	T	C	G	C	A	A	G	C	A	G	C	G	A	G	G	C	T	G	A	G	A	G	A	G	C
Dpse FB	A	T	C	G	C	T	A	A	G	A	G	C	T	A	A	T	T	T	C	G	T	A	G	T	T	C	G	C	A	A	G	C	A	G	C	G	A	G	G	C	T	G	A	G	A	G	A	G	C
	-343	-342	-341	-340	-339	-338	-337	-336	-335	-334	-333	-332	-331	-330	-329	-328	-327	-326	-325	-324	-323	-322	-321	-320	-319	-318	-317	-316	-315	-314	-313	-312	-311	-310	-309	-308	-307	-306	-305	-304	-303	-302	-301	-300	-299	-298	-297	-296	-295
8	8	8	8	8	8	8	8	8	8	8	8	8	8	8	8	8	8	8	8	8	8	8	8	8	8	8	8	8	8	8	8	8	8	8	8	8	8	8	8	8	8	8	8	8	8	8	8	8	8
0	0	0	0	0	0	0	0	0	1	1	1	1	1	1	1	1	1	1	2	2	2	2	2	2	2	2	2	2	3	3	3	3	3	3	3	3	3	3	4	4	4	4	4	4	4	4	4	4	5
1	2	3	4	5	6	7	8	9	0	1	2	3	4	5	6	7	8	9	0	1	2	3	4	5	6	7	8	9	0	1	2	3	4	5	6	7	8	9	0	1	2	3	4	5	6	7	8	9	0
bog175	G	G	C	A	A	T	T	T	T	C	G	T	A	C	G	T	G	C	G	T	G	A	G	C	C	T	A	C	C	C	C	G	T	A	G	G	C	C	T	A	C	T	C	C	A	A	T	C	G
pse139	G	G	C	A	A	T	T	T	T	C	G	T	A	C	G	T	G	C	G	T	G	A	G	C	C	T	A	C	C	C	C	G	T	A	G	G	C	C	T	A	C	T	C	C	A	A	T	C	G
Dpse FB	G	G	C	A	A	T	T	T	T	C	G	T	A	C	G	T	G	C	G	T	G	A	G	C	C	T	A	C	C	C	C	G	T	A	G	G	C	C	T	A	C	T	C	C	A	A	T	C	G
	-263	-262	-261	-260	-259	-258	-257	-256	-255	-254	-253	-252	-251	-250	-249	-248	-247	-246	-245	-244	-243	-242	-241	-240	-239	-238	-237	-236	-235	-234	-233	-232	-231	-230	-229	-228	-227	-226	-225	-224	-223	-222	-221	-220	-219	-218	-217	-216	-215
8	8	8	8	8	8	8	8	8	8	8	8	8	8	8	8	8	8	8	9	9	9	9	9	9	9	9	9	9	9	9	9	9	9	9	9	9	9	9	9	9	9	9	9	9	9	9	9	9	9
8	8	8	8	8	8	8	8	8	9	9	9	9	9	9	9	9	9	9	0	0	0	0	0	0	0	0	0	0	1	1	1	1	1	1	1	1	1	1	2	2	2	2	2	2	2	2	2	2	3
1	2	3	4	5	6	7	8	9	0	1	2	3	4	5	6	7	8	9	0	1	2	3	4	5	6	7	8	9	0	1	2	3	4	5	6	7	8	9	0	1	2	3	4	5	6	7	8	9	0
bog175	T	G	T	C	A	C	G	T	T	T	C	A	G	A	A	A	T	T	C	T	T	T	T	C	T	A	C	A	A	G	A	T	A	A	A	C	T	T	T	T	G	G	A	T	T	A	T	G	A
pse139	T	G	T	C	A	C	G	T	T	T	C	A	G	A	A	A	T	T	C	T	T	T	T	C	T	A	C	A	A	G	A	T	A	A	A	C	T	T	T	T	G	G	A	T	T	A	T	G	A
Dpse FB	T	G	T	C	A	C	G	T	T	T	C	A	G	A	A	A	T	T	C	T	T	T	T	C	T	A	C	A	A	G	A	T	A	A	A	C	T	T	T	T	G	G	A	T	T	A	T	G	A
	-183	-182	-181	-180	-179	-178	-177	-176	-175	-174	-173	-172	-171	-170	-169	-168	-167	-166	-165	-164	-163	-162	-161	-160	-159	-158	-157	-156	-155	-154	-153	-152	-151	-150	-149	-148	-147	-146	-145	-144	-143	-142	-141	-140	-139	-138	-137	-136	-135
																																							1	1	1	1	1	1	1	1	1	1	1
9	9	9	9	9	9	9	9	9	9	9	9	9	9	9	9	9	9	9	9	9	9	9	9	9	9	9	9	9	9	9	9	9	9	9	9	9	9	9	0	0	0	0	0	0	0	0	0	0	0
6	6	6	6	6	6	6	6	6	7	7	7	7	7	7	7	7	7	7	8	8	8	8	8	8	8	8	8	8	9	9	9	9	9	9	9	9	9	9	0	0	0	0	0	0	0	0	0	0	1
1	2	3	4	5	6	7	8	9	0	1	2	3	4	5	6	7	8	9	0	1	2	3	4	5	6	7	8	9	0	1	2	3	4	5	6	7	8	9	0	1	2	3	4	5	6	7	8	9	0
bog175	G	C	A	C	T	G	G	C	T	G	G	G	G	A	A	T	C	T	G	A	G	T	T	C	C	C	C	C	C	T	T	A	C	G	C	A	A	T	T	T	A	A	A	G	T	C	T	C	C
pse139	G	C	A	C	T	G	G	C	T	G	G	G	G	A	A	T	C	T	G	A	G	T	T	C	C	C	C	C	C	T	T	A	C	G	C	A	A	T	T	T	A	A	A	G	T	C	T	C	C
Dpse FB	G	C	A	C	T	G	G	C	T	G	G	G	G	A	A	T	C	T	G	A	G	T	T	C	C	C	C	C	C	T	T	A	C	G	C	A	A	T	T	T	A	A	A	G	T	C	T	C	C
	-103	-102	-101	-100	-99	-98	-97	-96	-95	-94	-93	-92	-91	-90	-89	-88	-87	-86	-85	-84	-83	-82	-81	-80	-79	-78	-77	-76	-75	-74	-73	-72	-71	-70	-69	-68	-67	-66	-65	-64	-63	-62	-61	-60	-59	-58	-57	-56	-55
1	1	1	1	1	1	1	1	1	1	1	1	1	1	1	1	1	1	1	1	1	1	1	1	1	1	1	1	1	1	1	1	1	1	1	1	1	1	1	1	1	1	1	1	1	1	1	1	1	1
0	0	0	0	0	0	0	0	0	0	0	0	0	0	0	0	0	0	0	0	0	0	0	0	0	0	0	0	0	0	0	0	0	0	0	0	0	0	0	0	0	0	0	0	0	0	0	0	0	0
4	4	4	4	4	4	4	4	4	5	5	5	5	5	5	5	5	5	5	6	6	6	6	6	6	6	6	6	6	7	7	7	7	7	7	7	7	7	7	8	8	8	8	8	8	8	8	8	8	9
1	2	3	4	5	6	7	8	9	0	1	2	3	4	5	6	7	8	9	0	1	2	3	4	5	6	7	8	9	0	1	2	3	4	5	6	7	8	9	0	1	2	3	4	5	6	7	8	9	0
bog175	A	G	T	T	A	A	T	T	A	T	T	A	A	G	T	T	G	T	C	A	A	A	T	T	A	T	T	G	A	T	C	A	A	A	T	T	T	A	T	G	T	G	T	T	T	C	G	A	A
pse139	A	G	T	T	A	A	T	T	A	T	T	A	A	G	T	T	G	T	C	A	A	A	T	T	A	T	T	G	A	T	C	A	A	A	T	T	T	A	T	G	T	G	T	T	T	C	G	A	A
Dpse FB	A	G	T	T	A	A	T	T	A	T	T	A	A	G	T	T	G	T	C	A	A	A	T	T	A	T	T	G	A	T	C	A	A	A	T	T	T	A	T	G	T	G	T	T	T	C	G	A	A
	-23	-22	-21	-20	-19	-18	-17	-16	-15	-14	-13	-12	-11	-10	-9	-8	-7	-6	-5	-4	-3	-2	-1	1	2	3	4	5	6	7	8	9	10	11	12	13	14	15	16	17	18	19	20	21	22	23	24	25	26
1	1	1	1	1	1	1	1	1	1	1	1	1	1	1	1	1	1	1	1	1	1	1	1	1	1	1	1	1	1	1	1	1	1	1	1	1	1	1	1	1	1	1	1	1	1	1	1	1	1
1	1	1	1	1	1	1	1	1	1	1	1	1	1	1	1	1	1	1	1	1	1	1	1	1	1	1	1	1	1	1	1	1	1	1	1	1	1	1	1	1	1	1	1	1	1	1	1	1	1
2	2	2	2	2	2	2	2	2	3	3	3	3	3	3	3	3	3	3	4	4	4	4	4	4	4	4	4	4	5	5	5	5	5	5	5	5	5	5	6	6	6	6	6	6	6	6	6	6	7
1	2	3	4	5	6	7	8	9	0	1	2	3	4	5	6	7	8	9	0	1	2	3	4	5	6	7	8	9	0	1	2	3	4	5	6	7	8	9	0	1	2	3	4	5	6	7	8	9	0
bog175	T	C	C	A	G	C	T	C	A	A	A	G	T	T	T	C	A	G	A	T	A	C	C	A	G	C	T	G	T	A	G	C	T	G	T	T	G	T	G	T	T	T	G	C	T	G	A	C	T
pse139	T	C	C	A	G	C	T	C	A	A	A	G	T	T	T	C	A	G	A	T	A	C	C	A	G	C	T	G	T	A	G	C	T	G	T	T	G	T	G	T	T	T	G	C	T	G	A	C	T
Dpse FB	T	C	C	A	G	C	T	C	A	A	A	G	T	T	T	C	A	G	A	T	A	C	C	A	G	C	T	G	T	A	G	C	T	G	T	T	G	T	G	T	T	T	G	C	T	G	A	C	T
	58	59	60	61	62	63	64	65	66	67	68	69	70	71	72	73	74	75	76	77	78	79	80	81	82	83	84	85	86	87	88	89	90	91	92	93	94	95	96	97	98	99	100	101	102	103	104	105	106
1	1	1	1	1	1	1	1	1	1	1	1	1	1	1	1	1	1	1	1	1	1	1	1	1	1	1	1	1	1	1	1	1	1	1	1	1	1	1	1	1	1	1	1	1	1	1	1	1	1
2	2	2	2	2	2	2	2	2	2	2	2	2	2	2	2	2	2	2	2	2	2	2	2	2	2	2	2	2	2	2	2	2	2	2	2	2	2	2	2	2	2	2	2	2	2	2	2	2	2
0	0	0	0	0	0	0	0	0	1	1	1	1	1	1	1	1	1	1	2	2	2	2	2	2	2	2	2	2	3	3	3	3	3	3	3	3	3	3	4	4	4	4	4	4	4	4	4	4	5
1	2	3	4	5	6	7	8	9	0	1	2	3	4	5	6	7	8	9	0	1	2	3	4	5	6	7	8	9	0	1	2	3	4	5	6	7	8	9	0	1	2	3	4	5	6	7	8	9	0
bog175	T	A	T	G	T	C	C	A	T	C	T	G	G	T	G	T	T	C	C	G	C	G	A	G	T	C	G	G	C	A	G	A	C	C	A	A	A	T	G	T	C	G	C	G	A	T	C	T	A
pse139	T	A	T	G	T	C	C	A	T	C	T	G	G	T	G	T	T	C	C	G	C	G	A	G	T	C	G	G	C	A	G	A	C	C	A	A	A	T	G	T	C	G	C	G	A	T	C	T	C
Dpse FB	T	A	T	G	T	C	C	A	T	C	T	G	G	T	G	T	T	C	C	G	C	G	A	G	T	C	G	G	C	A	G	A	C	C	A	A	A	T	G	T	C	G	C	G	A	T	C	T	A
	138	139	140	141	142	143	144	145	146	147	148	149	150	151	152	153	154	155	156	157	158	159	160	161	162	163	164	165	166	167	168	169	170	171	172	173	174	175	176	177	178	179	180	181	182	183	184	185	186
1	1	1	1	1	1	1	1	1	1	1	1	1	1	1	1	1	1	1	1	1	1	1	1	1	1	1	1	1	1	1	1	1	1	1	1	1	1	1	1	1	1	1	1	1	1	1	1	1	1
2	2	2	2	2	2	2	2	2	2	2	2	2	2	2	2	2	2	2	3	3	3	3	3	3	3	3	3	3	3	3	3	3	3	3	3	3	3	3	3	3	3	3	3	3	3	3	3	3	3
8	8	8	8	8	8	8	8	8	9	9	9	9	9	9	9	9	9	9	0	0	0	0	0	0	0	0	0	0	1	1	1	1	1	1	1	1	1	1	2	2	2	2	2	2	2	2	2	2	3
1	2	3	4	5	6	7	8	9	0	1	2	3	4	5	6	7	8	9	0	1	2	3	4	5	6	7	8	9	0	1	2	3	4	5	6	7	8	9	0	1	2	3	4	5	6	7	8	9	0
bog175	G	G	T	G	C	T	G	A	T	G	C	A	G	G	T	A	A	G	A	C	T	A	C	G	T	A	C	T	A	C	G	A	C	A	G	C	C	C	C	C	G	A	C	T	G	C	C	A	A
pse139	G	G	T	G	C	T	G	A	T	G	C	A	G	G	T	A	A	G	A	C	T	A	C	G	T	A	C	T	A	C	G	A	C	A	G	C	C	C	C	C	G	A	C	T	G	C	C	A	A
Dpse FB	G	G	T	G	C	T	G	A	T	G	C	A	G	G	T	A	A	G	A	C	T	A	C	G	T	A	C	T	A	C	G	A	C	A	G	C	C	C	C	C	G	A	C	T	G	C	C	A	A
	218	219	220	221	222	223	224	225	226	227	228	229	230	231	232	233	234	235	236	237	238	239	240	241	242	243	244	245	246	247	248	249	250	251	252	253	254	255	256	257	258	259	260	261	262	263	264	265	266
1	1	1	1	1	1	1	1	1	1	1	1	1	1	1	1	1	1	1	1	1	1	1	1	1	1	1	1	1	1	1	1	1	1	1	1	1	1	1	1	1	1	1	1	1	1	1	1	1	1
3	3	3	3	3	3	3	3	3	3	3	3	3	3	3	3	3	3	3	3	3	3	3	3	3	3	3	3	3	3	3	3	3	3	3	3	3	3	3	4	4	4	4	4	4	4	4	4	4	4
6	6	6	6	6	6	6	6	6	7	7	7	7	7	7	7	7	7	7	8	8	8	8	8	8	8	8	8	8	9	9	9	9	9	9	9	9	9	9	0	0	0	0	0	0	0	0	0	0	1
1	2	3	4	5	6	7	8	9	0	1	2	3	4	5	6	7	8	9	0	1	2	3	4	5	6	7	8	9	0	1	2	3	4	5	6	7	8	9	0	1	2	3	4	5	6	7	8	9	0
bog175	G	T	T	G	C	T	T	A	C	C	C	G	C	C	T	G	G	A	G	A	A	C	T	C	G	T	C	C	A	C	C	T	T	T	G	G	C	T	A	C	G	A	G	G	G	C	G	C	C
pse139	G	T	T	G	C	T	T	A	C	C	C	G	C	C	T	G	G	A	G	A	A	C	T	C	G	T	C	C	A	C	C	T	T	T	G	G	C	T	A	C	G	A	G	G	G	C	G	C	C
Dpse FB	G	T	T	G	C	T	T	A	C	C	C	G	C	C	T	G	G	A	G	A	A	C	T	C	G	T	C	C	A	C	C	T	T	T	G	G	C	T	A	C	G	A	G	G	G	C	G	C	C
	298	299	300	301	302	303	304	305	306	307	308	309	310	311	312	313	314	315	316	317	318	319	320	321	322	323	324	325	326	327	328	329	330	331	332	333	334	335	336	337	338	339	340	341	342	343	344	345	346
1	1	1	1	1	1	1	1	1	1	1	1	1	1	1	1	1	1	1	1	1	1	1	1	1	1	1	1	1	1	1	1	1	1	1	1	1	1	1	1	1	1	1	1	1	1	1	1	1	1
4	4	4	4	4	4	4	4	4	4	4	4	4	4	4	4	4	4	4	4	4	4	4	4	4	4	4	4	4	4	4	4	4	4	4	4	4	4	4	4	4	4	4	4	4	4	4	4	4	4
4	4	4	4	4	4	4	4	4	5	5	5	5	5	5	5	5	5	5	6	6	6	6	6	6	6	6	6	6	7	7	7	7	7	7	7	7	7	7	8	8	8	8	8	8	8	8	8	8	9
1	2	3	4	5	6	7	8	9	0	1	2	3	4	5	6	7	8	9	0	1	2	3	4	5	6	7	8	9	0	1	2	3	4	5	6	7	8	9	0	1	2	3	4	5	6	7	8	9	0
bog175	C	A	G	A	T	G	T	G	G	T	G	G	T	G	C	T	C	C	A	C	G	C	C	A	A	T	G	A	C	T	T	C	A	G	C	A	T	T	A	A	G	T	T	G	G	G	A	A	A
pse139	C	A	G	A	T	G	T	G	G	T	G	G	T	G	C	T	C	C	A	C	G	C	C	A	A	T	G	A	C	T	T	C	A	G	C	A	T	T	A	A	G	T	T	G	G	G	A	A	A
Dpse FB	C	A	G	A	T	G	T	G	G	T	G	G	T	G	C	T	C	C	A	C	G	C	C	A	A	T	G	A	C	T	T	C	A	G	C	A	T	T	A	A	G	T	T	G	G	G	A	A	A
	378	379	380	381	382	383	384	385	386	387	388	389	390	391	392	393	394	395	396	397	398	399	400	401	402	403	404	405	406	407	408	409	410	411	412	413	414	415	416	417	418	419	420	421	422	423	424	425	426
1	1	1	1	1	1	1	1	1	1	1	1	1	1	1	1	1	1	1	1	1	1	1	1	1	1	1	1	1	1	1	1	1	1	1	1	1	1	1	1	1	1	1	1	1	1	1	1	1	1
5	5	5	5	5	5	5	5	5	5	5	5	5	5	5	5	5	5	5	5	5	5	5	5	5	5	5	5	5	5	5	5	5	5	5	5	5	5	5	5	5	5	5	5	5	5	5	5	5	5
2	2	2	2	2	2	2	2	2	3	3	3	3	3	3	3	3	3	3	4	4	4	4	4	4	4	4	4	4	5	5	5	5	5	5	5	5	5	5	6	6	6	6	6	6	6	6	6	6	7
1	2	3	4	5	6	7	8	9	0	1	2	3	4	5	6	7	8	9	0	1	2	3	4	5	6	7	8	9	0	1	2	3	4	5	6	7	8	9	0	1	2	3	4	5	6	7	8	9	0
bog175	A	A	G	T	A	C	G	A	A	G	T	T	A	C	G	G	A	G	T	T	C	A	G	C	T	T	T	A	A	T	A	G	A	A	A	G	T	T	G	G	A	C	T	A	T	C	T	A	A
pse139	A	A	G	T	A	C	G	A	A	G	T	T	A	C	G	G	A	G	T	T	C	A	G	C	T	T	T	A	A	T	A	G	A	A	A	G	T	T	G	G	A	C	T	A	T	C	T	A	A
Dpse FB	A	A	G	T	A	C	G	A	A	G	T	T	A	C	G	G	A	G	T	T	C	A	G	C	T	T	T	A	A	T	A	G	A	A	A	G	T	T	G	G	A	C	T	A	T	C	T	A	A
	458	459	460	461	462	463	464	465	466	467	468	469	470	471	472	473	474	475	476	477	478	479	480	481	482	483	484	485	486	487	488	489	490	491	492	493	494	495	496	497	498	499	500	501	502	503	504	505	506
1	1	1	1	1	1	1	1	1	1	1	1	1	1	1	1	1	1	1	1	1	1	1	1	1	1	1	1	1	1	1	1	1	1	1	1	1	1	1	1	1	1	1	1	1	1	1	1	1	1
6	6	6	6	6	6	6	6	6	6	6	6	6	6	6	6	6	6	6	6	6	6	6	6	6	6	6	6	6	6	6	6	6	6	6	6	6	6	6	6	6	6	6	6	6	6	6	6	6	6
0	0	0	0	0	0	0	0	0	1	1	1	1	1	1	1	1	1	1	2	2	2	2	2	2	2	2	2	2	3	3	3	3	3	3	3	3	3	3	4	4	4	4	4	4	4	4	4	4	5
1	2	3	4	5	6	7	8	9	0	1	2	3	4	5	6	7	8	9	0	1	2	3	4	5	6	7	8	9	0	1	2	3	4	5	6	7	8	9	0	1	2	3	4	5	6	7	8	9	0
bog175	T	A	G	G	T	A	C	T	A	C	A	A	T	C	T	G	A	A	C	A	T	C	G	A	G	T	T	C	G	G	T	C	G	A	C	G	A	A	T	G	T	C	G	G	A	G	A	A	A
pse139	T	A	G	G	T	A	C	T	A	C	A	G	T	C	T	G	A	A	T	A	T	C	G	A	G	T	T	C	G	G	T	C	G	A	C	G	A	A	T	G	T	C	G	G	A	G	A	A	C
Dpse FB	T	A	G	G	T	A	C	T	A	C	A	A	T	C	T	G	A	A	T	A	T	C	G	A	G	T	T	C	G	G	T	C	G	A	C	G	A	A	T	G	T	C	G	G	A	G	A	A	C
	538	539	540	541	542	543	544	545	546	547	548	549	550	551	552	553	554	555	556	557	558	559	560	561	562	563	564	565	566	567	568	569	570	571	572	573	574	575	576	577	578	579	580	581	582	583	584	585	586
1	1	1	1	1	1	1	1	1	1	1	1	1	1	1	1	1	1	1	1	1	1	1	1	1	1	1	1	1	1	1	1	1	1	1	1	1	1	1	1	1	1
6	6	6	6	6	6	6	6	6	6	6	6	6	6	6	6	6	6	6	7	7	7	7	7	7	7	7	7	7	7	7	7	7	7	7	7	7	7	7	7	7	7
8	8	8	8	8	8	8	8	8	9	9	9	9	9	9	9	9	9	9	0	0	0	0	0	0	0	0	0	0	1	1	1	1	1	1	1	1	1	1	2	2	2
1	2	3	4	5	6	7	8	9	0	1	2	3	4	5	6	7	8	9	0	1	2	3	4	5	6	7	8	9	0	1	2	3	4	5	6	7	8	9	0	1	2
bog175	C	G	G	A	T	G	T	G	G	T	G	T	C	G	C	A	G	C	A	G	A	A	A	A	G	G	T	A	G	G	T	C	T	C	C	T	C	C	G	A	C	T
pse139	C	G	G	A	T	G	T	G	G	G	G	T	C	G	C	A	G	C	A	G	A	A	A	A	G	G	T	A	G	G	T	C	T	C	C	C	C	C	G	A	C	T
Dpse FB	C	G	G	A	T	G	T	G	G	T	G	T	C	G	C	A	G	C	A	G	A	A	A	A	G	G	T	A	G	G	T	C	T	C	C	C	C	C	G	A	C	T
	618	619	620	621	622	623	624	625	626	627	628	629	630	631	632	633	634	635	636	637	638	639	640	641	642	643	644	645	646	647	648	649	650	651	652	653	654	655	656	657	658	659
	positions
SRX	586	653
204773	b	p
204778	b	p
204764	p	b
204755	p	p
204758	p	p
204769	p	p
204748	p
204752	p
204762	p
204765	p
204776	p
204777	p
204785		p
204789		p
[truncated: 31 more columns]

## Sheet: GA22690
GA22690 (-11123>+518)
									1	1	1	1	1	1	1	1	1	1	2	2	2	2	2	2	2	2	2	2	3	3	3	3	3	3	3	3	3	3	4	4	4	4	4	4	4	4	4	4	5
1	2	3	4	5	6	7	8	9	0	1	2	3	4	5	6	7	8	9	0	1	2	3	4	5	6	7	8	9	0	1	2	3	4	5	6	7	8	9	0	1	2	3	4	5	6	7	8	9	0
bog175	G	A	T	T	G	C	C	A	C	T	G	A	C	A	T	A	A	A	A	T	G	G	T	A	T	A	A	C	T	T	T	T	G	A	C	T	T	G	A	G	T	G	A	A	A	C	A	A	A
pse139	G	A	T	T	G	C	C	A	C	T	G	A	C	A	T	A	A	A	A	T	G	G	T	A	T	A	A	C	T	T	T	T	G	A	C	T	T	G	A	G	T	G	A	A	A	C	A	A	A
pseFB	G	A	T	T	G	C	C	A	C	T	G	A	C	A	T	A	A	T	A	T	G	G	T	A	T	A	A	C	T	T	T	T	G	A	C	T	T	G	A	G	T	G	A	A	A	C	A	A	A
	-1123	-1122	-1121	-1120	-1119	-1118	-1117	-1116	-1115	-1114	-1113	-1112	-1111	-1110	-1109	-1108	-1107	-1106	-1105	-1104	-1103	-1102	-1101	-1100	-1099	-1098	-1097	-1096	-1095	-1094	-1093	-1092	-1091	-1090	-1089	-1088	-1087	-1086	-1085	-1084	-1083	-1082	-1081	-1080	-1079	-1078	-1077	-1076	-1075
																			1	1	1	1	1	1	1	1	1	1	1	1	1	1	1	1	1	1	1	1	1	1	1	1	1	1	1	1	1	1	1
8	8	8	8	8	8	8	8	8	9	9	9	9	9	9	9	9	9	9	0	0	0	0	0	0	0	0	0	0	1	1	1	1	1	1	1	1	1	1	2	2	2	2	2	2	2	2	2	2	3
1	2	3	4	5	6	7	8	9	0	1	2	3	4	5	6	7	8	9	0	1	2	3	4	5	6	7	8	9	0	1	2	3	4	5	6	7	8	9	0	1	2	3	4	5	6	7	8	9	0
bog175	A	A	T	A	T	T	T	T	C	A	T	T	C	A	T	G	C	C	C	A	T	C	A	A	A	A	T	G	T	C	C	C	T	-	-	-	-	-	-	-	-	-	-	-	-	-	-	-	-
pse139	A	A	T	A	T	T	T	T	C	A	T	T	C	A	T	G	C	C	C	A	T	C	A	A	A	A	T	G	T	C	C	C	T	T	T	T	T	T	G	T	T	G	T	T	T	G	T	T	C
pseFB	A	A	T	A	T	T	T	T	C	A	T	T	C	A	T	G	C	C	C	A	T	C	A	A	A	A	T	G	T	C	C	C	T	-	-	-	-	-	-	-	-	-	-	-	-	-	-	-	-
	-1143	-1142	-1141	-1140	-1139	-1138	-1137	-1136	-1135	-1134	-1133	-1132	-1131	-1130	-1129	-1128	-1127	-1126	-1125	-1124	-1123	-1122	-1121	-1120	-1119	-1118	-1117	-1116	-1115	-1114	-1113	-1112	-1111	-1110	-1109	-1108	-1107	-1106	-1105	-1104	-1103	-1102	-1101	-1100	-1099	-1098	-1097	-1096	-1095
1	1	1	1	1	1	1	1	1	1	1	1	1	1	1	1	1	1	1	1	1	1	1	1	1	1	1	1	1	1	1	1	1	1	1	1	1	1	1	2	2	2	2	2	2	2	2	2	2	2
6	6	6	6	6	6	6	6	6	7	7	7	7	7	7	7	7	7	7	8	8	8	8	8	8	8	8	8	8	9	9	9	9	9	9	9	9	9	9	0	0	0	0	0	0	0	0	0	0	1
1	2	3	4	5	6	7	8	9	0	1	2	3	4	5	6	7	8	9	0	1	2	3	4	5	6	7	8	9	0	1	2	3	4	5	6	7	8	9	0	1	2	3	4	5	6	7	8	9	0
bog175	A	A	A	A	A	C	A	T	T	A	A	A	C	A	T	C	C	A	T	A	A	A	A	A	T	C	G	A	T	T	G	C	C	T	T	A	T	A	T	T	C	A	C	T	C	C	T	T	T
pse139	A	A	A	A	A	C	A	T	T	A	A	A	C	A	T	C	C	A	T	A	A	A	A	A	T	C	G	A	T	T	G	C	C	T	T	A	T	A	T	T	C	A	C	T	C	C	T	T	T
pseFB	A	A	A	A	A	C	A	T	T	A	A	A	C	A	T	C	C	A	T	A	A	A	A	A	T	C	G	A	T	T	G	C	C	T	T	A	T	A	T	T	C	A	C	T	C	C	T	T	T
	-1163	-1162	-1161	-1160	-1159	-1158	-1157	-1156	-1155	-1154	-1153	-1152	-1151	-1150	-1149	-1148	-1147	-1146	-1145	-1144	-1143	-1142	-1141	-1140	-1139	-1138	-1137	-1136	-1135	-1134	-1133	-1132	-1131	-1130	-1129	-1128	-1127	-1126	-1125	-1124	-1123	-1122	-1121	-1120	-1119	-1118	-1117	-1116	-1115
2	2	2	2	2	2	2	2	2	2	2	2	2	2	2	2	2	2	2	2	2	2	2	2	2	2	2	2	2	2	2	2	2	2	2	2	2	2	2	2	2	2	2	2	2	2	2	2	2	2
4	4	4	4	4	4	4	4	4	5	5	5	5	5	5	5	5	5	5	6	6	6	6	6	6	6	6	6	6	7	7	7	7	7	7	7	7	7	7	8	8	8	8	8	8	8	8	8	8	9
1	2	3	4	5	6	7	8	9	0	1	2	3	4	5	6	7	8	9	0	1	2	3	4	5	6	7	8	9	0	1	2	3	4	5	6	7	8	9	0	1	2	3	4	5	6	7	8	9	0
bog175	G	A	C	A	C	A	T	C	A	T	T	T	C	T	A	T	T	A	A	C	T	T	T	C	C	A	T	T	C	A	C	-	T	T	T	T	C	G	G	A	T	A	T	T	T	T	T	T	G
pse139	G	A	C	A	C	A	T	C	A	T	T	T	C	T	A	T	T	A	A	C	T	T	T	C	C	A	T	T	T	A	C	T	T	T	T	T	C	G	G	A	T	A	T	T	T	T	T	T	G
pseFB	G	A	C	A	C	A	T	C	A	T	T	T	C	T	A	T	T	A	A	C	T	T	T	C	C	A	T	T	T	A	C	T	T	T	T	T	C	G	G	A	T	A	T	T	T	T	T	T	-
	-1083	-1082	-1081	-1080	-1079	-1078	-1077	-1076	-1075	-1074	-1073	-1072	-1071	-1070	-1069	-1068	-1067	-1066	-1065	-1064	-1063	-1062	-1061	-1060	-1059	-1058	-1057	-1056	-1055	-1054	-1053	-1052	-1051	-1050	-1049	-1048	-1047	-1046	-1045	-1044	-1043	-1042	-1041	-1040	-1039	-1038	-1037	-1036	-1035
3	3	3	3	3	3	3	3	3	3	3	3	3	3	3	3	3	3	3	3	3	3	3	3	3	3	3	3	3	3	3	3	3	3	3	3	3	3	3	3	3	3	3	3	3	3	3	3	3	3
2	2	2	2	2	2	2	2	2	3	3	3	3	3	3	3	3	3	3	4	4	4	4	4	4	4	4	4	4	5	5	5	5	5	5	5	5	5	5	6	6	6	6	6	6	6	6	6	6	7
1	2	3	4	5	6	7	8	9	0	1	2	3	4	5	6	7	8	9	0	1	2	3	4	5	6	7	8	9	0	1	2	3	4	5	6	7	8	9	0	1	2	3	4	5	6	7	8	9	0
bog175	G	G	C	C	A	A	G	A	A	G	C	G	C	T	G	C	C	G	C	A	T	G	A	C	G	C	G	C	G	C	C	G	C	G	T	A	T	A	A	A	C	G	A	A	C	C	A	A	T
pse139	G	G	C	C	A	A	G	A	A	G	C	G	C	T	G	C	C	G	C	A	T	G	A	C	G	C	G	C	G	C	C	G	C	A	T	A	T	A	A	A	C	G	A	A	C	C	A	A	T
pseFB	G	G	C	C	A	A	G	A	A	G	C	G	C	T	G	C	C	G	C	A	T	G	A	C	G	C	G	C	G	C	C	G	C	G	T	A	T	A	A	A	C	G	A	A	C	C	A	A	T
	-1003	-1002	-1001	-1000	-999	-998	-997	-996	-995	-994	-993	-992	-991	-990	-989	-988	-987	-986	-985	-984	-983	-982	-981	-980	-979	-978	-977	-976	-975	-974	-973	-972	-971	-970	-969	-968	-967	-966	-965	-964	-963	-962	-961	-960	-959	-958	-957	-956	-955
4	4	4	4	4	4	4	4	4	4	4	4	4	4	4	4	4	4	4	4	4	4	4	4	4	4	4	4	4	4	4	4	4	4	4	4	4	4	4	4	4	4	4	4	4	4	4	4	4	4
0	0	0	0	0	0	0	0	0	1	1	1	1	1	1	1	1	1	1	2	2	2	2	2	2	2	2	2	2	3	3	3	3	3	3	3	3	3	3	4	4	4	4	4	4	4	4	4	4	5
1	2	3	4	5	6	7	8	9	0	1	2	3	4	5	6	7	8	9	0	1	2	3	4	5	6	7	8	9	0	1	2	3	4	5	6	7	8	9	0	1	2	3	4	5	6	7	8	9	0
bog175	C	A	A	T	T	A	A	A	G	G	A	A	A	A	T	T	C	G	A	G	C	T	A	A	A	C	A	A	A	A	T	A	C	A	A	A	T	A	C	C	A	T	T	A	A	T	A	A	T
pse139	C	A	A	T	T	A	A	A	G	G	A	A	A	A	T	T	C	G	A	G	C	T	A	A	A	C	A	A	A	A	T	A	C	A	A	A	T	A	C	C	A	T	T	A	A	T	A	A	T
pseFB	C	A	A	T	T	A	A	A	G	G	A	A	A	A	T	T	C	G	A	G	C	T	A	A	A	C	A	A	A	A	T	A	C	A	A	A	T	A	C	C	A	T	T	A	A	T	A	A	T
	-923	-922	-921	-920	-919	-918	-917	-916	-915	-914	-913	-912	-911	-910	-909	-908	-907	-906	-905	-904	-903	-902	-901	-900	-899	-898	-897	-896	-895	-894	-893	-892	-891	-890	-889	-888	-887	-886	-885	-884	-883	-882	-881	-880	-879	-878	-877	-876	-875
4	4	4	4	4	4	4	4	4	4	4	4	4	4	4	4	4	4	4	5	5	5	5	5	5	5	5	5	5	5	5	5	5	5	5	5	5	5	5	5	5	5	5	5	5	5	5	5	5	5
8	8	8	8	8	8	8	8	8	9	9	9	9	9	9	9	9	9	9	0	0	0	0	0	0	0	0	0	0	1	1	1	1	1	1	1	1	1	1	2	2	2	2	2	2	2	2	2	2	3
1	2	3	4	5	6	7	8	9	0	1	2	3	4	5	6	7	8	9	0	1	2	3	4	5	6	7	8	9	0	1	2	3	4	5	6	7	8	9	0	1	2	3	4	5	6	7	8	9	0
bog175	A	A	G	A	A	G	A	G	G	A	A	G	G	G	A	A	T	T	A	G	T	G	G	T	G	G	C	T	A	T	A	C	T	A	T	G	G	T	A	G	A	G	G	G	A	A	C	T	A
pse139	A	A	G	A	A	G	A	G	G	A	A	G	G	A	A	T	T	T	A	G	T	G	T	T	G	G	C	T	A	T	A	C	T	A	T	G	G	T	C	G	A	G	G	G	A	A	C	T	A
pseFB	A	A	G	A	A	G	A	G	G	A	A	G	G	G	A	A	T	T	A	G	T	G	G	T	G	G	C	T	A	T	A	C	T	A	T	G	G	T	A	G	A	G	G	G	A	A	C	T	A
	-843	-842	-841	-840	-839	-838	-837	-836	-835	-834	-833	-832	-831	-830	-829	-828	-827	-826	-825	-824	-823	-822	-821	-820	-819	-818	-817	-816	-815	-814	-813	-812	-811	-810	-809	-808	-807	-806	-805	-804	-803	-802	-801	-800	-799	-798	-797	-796	-795
5	5	5	5	5	5	5	5	5	5	5	5	5	5	5	5	5	5	5	5	5	5	5	5	5	5	5	5	5	5	5	5	5	5	5	5	5	5	5	6	6	6	6	6	6	6	6	6	6	6
6	6	6	6	6	6	6	6	6	7	7	7	7	7	7	7	7	7	7	8	8	8	8	8	8	8	8	8	8	9	9	9	9	9	9	9	9	9	9	0	0	0	0	0	0	0	0	0	0	1
1	2	3	4	5	6	7	8	9	0	1	2	3	4	5	6	7	8	9	0	1	2	3	4	5	6	7	8	9	0	1	2	3	4	5	6	7	8	9	0	1	2	3	4	5	6	7	8	9	0
bog175	A	T	T	T	A	C	A	A	A	G	C	G	G	A	A	G	G	G	A	A	C	A	G	G	T	C	A	G	G	A	C	A	G	T	C	A	G	G	C	C	A	A	G	T	C	A	G	G	G
pse139	A	T	T	T	A	C	A	A	A	G	C	G	A	A	A	G	G	G	A	A	C	A	G	G	T	C	A	G	G	A	C	A	G	T	C	A	G	G	C	C	A	A	G	T	C	A	G	G	G
pseFB	A	T	T	T	A	C	A	A	A	G	C	G	A	A	A	G	G	G	A	A	C	A	G	G	T	C	A	G	G	A	C	A	G	T	C	A	G	G	C	C	A	A	G	T	C	A	G	G	G
	-763	-762	-761	-760	-759	-758	-757	-756	-755	-754	-753	-752	-751	-750	-749	-748	-747	-746	-745	-744	-743	-742	-741	-740	-739	-738	-737	-736	-735	-734	-733	-732	-731	-730	-729	-728	-727	-726	-725	-724	-723	-722	-721	-720	-719	-718	-717	-716	-715
6	6	6	6	6	6	6	6	6	6	6	6	6	6	6	6	6	6	6	6	6	6	6	6	6	6	6	6	6	6	6	6	6	6	6	6	6	6	6	6	6	6	6	6	6	6	6	6	6	6
4	4	4	4	4	4	4	4	4	5	5	5	5	5	5	5	5	5	5	6	6	6	6	6	6	6	6	6	6	7	7	7	7	7	7	7	7	7	7	8	8	8	8	8	8	8	8	8	8	9
1	2	3	4	5	6	7	8	9	0	1	2	3	4	5	6	7	8	9	0	1	2	3	4	5	6	7	8	9	0	1	2	3	4	5	6	7	8	9	0	1	2	3	4	5	6	7	8	9	0
bog175	A	C	A	A	A	A	A	T	C	A	C	A	C	T	A	A	G	A	A	T	G	G	A	A	G	G	T	T	T	A	T	T	G	A	A	A	G	C	A	A	T	C	T	A	C	T	G	C	A
pse139	A	C	A	A	A	A	A	T	C	A	C	A	C	T	A	A	G	A	A	T	G	G	A	A	G	G	T	T	T	A	T	T	G	A	A	A	G	C	A	A	T	C	T	A	C	T	G	C	A
pseFB	A	C	A	A	A	A	A	T	C	A	C	A	C	T	A	A	G	A	A	T	G	G	A	A	G	G	T	T	T	T	T	T	G	A	A	A	G	C	A	A	T	C	T	A	C	T	G	C	A
	-683	-682	-681	-680	-679	-678	-677	-676	-675	-674	-673	-672	-671	-670	-669	-668	-667	-666	-665	-664	-663	-662	-661	-660	-659	-658	-657	-656	-655	-654	-653	-652	-651	-650	-649	-648	-647	-646	-645	-644	-643	-642	-641	-640	-639	-638	-637	-636	-635
7	7	7	7	7	7	7	7	7	7	7	7	7	7	7	7	7	7	7	7	7	7	7	7	7	7	7	7	7	7	7	7	7	7	7	7	7	7	7	7	7	7	7	7	7	7	7	7	7	7
2	2	2	2	2	2	2	2	2	3	3	3	3	3	3	3	3	3	3	4	4	4	4	4	4	4	4	4	4	5	5	5	5	5	5	5	5	5	5	6	6	6	6	6	6	6	6	6	6	7
1	2	3	4	5	6	7	8	9	0	1	2	3	4	5	6	7	8	9	0	1	2	3	4	5	6	7	8	9	0	1	2	3	4	5	6	7	8	9	0	1	2	3	4	5	6	7	8	9	0
bog175	A	A	A	G	G	T	T	T	T	T	C	T	T	G	A	C	T	G	A	T	T	C	T	A	T	A	G	G	G	T	A	C	T	G	T	T	A	T	A	C	T	T	T	G	T	A	C	T	G
pse139	A	A	A	G	G	T	T	T	T	T	C	T	T	G	A	C	T	G	A	T	T	C	T	A	T	A	G	G	G	T	C	C	T	G	T	T	A	T	A	C	T	T	T	G	T	A	C	T	G
pseFB	A	A	A	G	G	T	T	T	T	T	C	T	T	G	A	C	T	G	A	T	T	C	T	A	T	A	G	G	G	T	C	C	T	G	A	T	A	T	A	-	G	C	T	A	T	A	T	A	G
	-603	-602	-601	-600	-599	-598	-597	-596	-595	-594	-593	-592	-591	-590	-589	-588	-587	-586	-585	-584	-583	-582	-581	-580	-579	-578	-577	-576	-575	-574	-573	-572	-571	-570	-569	-568	-567	-566	-565	-564	-563	-562	-561	-560	-559	-558	-557	-556	-555
8	8	8	8	8	8	8	8	8	8	8	8	8	8	8	8	8	8	8	8	8	8	8	8	8	8	8	8	8	8	8	8	8	8	8	8	8	8	8	8	8	8	8	8	8	8	8	8	8	8
0	0	0	0	0	0	0	0	0	1	1	1	1	1	1	1	1	1	1	2	2	2	2	2	2	2	2	2	2	3	3	3	3	3	3	3	3	3	3	4	4	4	4	4	4	4	4	4	4	5
1	2	3	4	5	6	7	8	9	0	1	2	3	4	5	6	7	8	9	0	1	2	3	4	5	6	7	8	9	0	1	2	3	4	5	6	7	8	9	0	1	2	3	4	5	6	7	8	9	0
bog175	G	A	T	C	C	A	C	A	T	A	C	A	T	G	A	G	T	A	C	T	C	G	A	G	A	G	T	A	T	G	T	T	A	A	T	A	C	C	G	A	C	G	G	A	A	A	G	T	C
pse139	G	A	T	C	C	A	C	A	T	A	C	A	T	G	A	G	T	A	C	T	C	G	A	G	A	G	T	A	T	G	T	T	A	A	T	A	C	C	G	A	C	G	G	A	A	A	G	T	C
pseFB	G	A	T	C	C	A	C	A	T	A	C	A	T	G	A	G	T	A	C	T	C	G	A	G	A	G	T	A	T	G	T	T	A	A	T	A	C	C	G	A	C	A	A	A	T	A	G	T	C
	-523	-522	-521	-520	-519	-518	-517	-516	-515	-514	-513	-512	-511	-510	-509	-508	-507	-506	-505	-504	-503	-502	-501	-500	-499	-498	-497	-496	-495	-494	-493	-492	-491	-490	-489	-488	-487	-486	-485	-484	-483	-482	-481	-480	-479	-478	-477	-476	-475
8	8	8	8	8	8	8	8	8	8	8	8	8	8	8	8	8	8	8	9	9	9	9	9	9	9	9	9	9	9	9	9	9	9	9	9	9	9	9	9	9	9	9	9	9	9	9	9	9	9
8	8	8	8	8	8	8	8	8	9	9	9	9	9	9	9	9	9	9	0	0	0	0	0	0	0	0	0	0	1	1	1	1	1	1	1	1	1	1	2	2	2	2	2	2	2	2	2	2	3
1	2	3	4	5	6	7	8	9	0	1	2	3	4	5	6	7	8	9	0	1	2	3	4	5	6	7	8	9	0	1	2	3	4	5	6	7	8	9	0	1	2	3	4	5	6	7	8	9	0
bog175	A	G	A	G	G	G	C	T	G	C	C	C	A	A	T	G	G	T	A	C	T	C	C	C	G	A	A	G	T	A	A	C	C	T	T	A	A	C	T	G	G	T	G	A	A	G	A	G	A
pse139	A	G	A	G	G	G	C	T	G	C	C	C	A	A	T	G	T	T	A	C	T	C	C	C	G	A	A	G	T	A	A	C	C	T	T	A	A	C	T	G	G	T	G	A	A	G	A	G	A
pseFB	A	G	A	G	G	G	C	T	G	C	C	C	A	A	T	G	T	T	A	C	T	C	C	C	G	A	A	G	T	A	A	C	C	T	T	A	A	C	T	G	G	T	G	A	A	G	A	G	A
	-443	-442	-441	-440	-439	-438	-437	-436	-435	-434	-433	-432	-431	-430	-429	-428	-427	-426	-425	-424	-423	-422	-421	-420	-419	-418	-417	-416	-415	-414	-413	-412	-411	-410	-409	-408	-407	-406	-405	-404	-403	-402	-401	-400	-399	-398	-397	-396	-395
																																							1	1	1	1	1	1	1	1	1	1	1
9	9	9	9	9	9	9	9	9	9	9	9	9	9	9	9	9	9	9	9	9	9	9	9	9	9	9	9	9	9	9	9	9	9	9	9	9	9	9	0	0	0	0	0	0	0	0	0	0	0
6	6	6	6	6	6	6	6	6	7	7	7	7	7	7	7	7	7	7	8	8	8	8	8	8	8	8	8	8	9	9	9	9	9	9	9	9	9	9	0	0	0	0	0	0	0	0	0	0	1
1	2	3	4	5	6	7	8	9	0	1	2	3	4	5	6	7	8	9	0	1	2	3	4	5	6	7	8	9	0	1	2	3	4	5	6	7	8	9	0	1	2	3	4	5	6	7	8	9	0
bog175	A	A	G	A	A	A	T	C	C	A	T	C	T	C	A	T	G	A	G	G	T	T	G	G	T	C	G	T	A	A	A	C	C	C	T	A	A	A	A	G	G	G	C	A	A	G	T	T	T
pse139	A	A	G	A	A	A	T	C	C	A	T	C	C	C	A	G	G	A	G	G	T	T	G	G	T	C	G	T	A	A	A	C	C	C	T	A	A	A	A	G	G	G	C	A	A	G	T	T	T
pseFB	A	A	G	A	A	A	T	C	C	A	T	C	C	A	A	G	G	A	G	G	T	T	G	G	T	C	G	T	A	A	A	C	C	C	T	A	A	A	A	G	G	G	C	A	A	G	T	T	T
	-363	-362	-361	-360	-359	-358	-357	-356	-355	-354	-353	-352	-351	-350	-349	-348	-347	-346	-345	-344	-343	-342	-341	-340	-339	-338	-337	-336	-335	-334	-333	-332	-331	-330	-329	-328	-327	-326	-325	-324	-323	-322	-321	-320	-319	-318	-317	-316	-315
1	1	1	1	1	1	1	1	1	1	1	1	1	1	1	1	1	1	1	1	1	1	1	1	1	1	1	1	1	1	1	1	1	1	1	1	1	1	1	1	1	1	1	1	1	1	1	1	1	1
0	0	0	0	0	0	0	0	0	0	0	0	0	0	0	0	0	0	0	0	0	0	0	0	0	0	0	0	0	0	0	0	0	0	0	0	0	0	0	0	0	0	0	0	0	0	0	0	0	0
4	4	4	4	4	4	4	4	4	5	5	5	5	5	5	5	5	5	5	6	6	6	6	6	6	6	6	6	6	7	7	7	7	7	7	7	7	7	7	8	8	8	8	8	8	8	8	8	8	9
1	2	3	4	5	6	7	8	9	0	1	2	3	4	5	6	7	8	9	0	1	2	3	4	5	6	7	8	9	0	1	2	3	4	5	6	7	8	9	0	1	2	3	4	5	6	7	8	9	0
bog175	A	A	T	G	T	T	A	A	A	T	G	T	C	T	G	A	T	A	A	A	T	T	T	T	A	A	A	A	C	C	A	T	T	C	T	G	G	G	C	T	G	G	A	G	A	T	A	T	A
pse139	A	A	T	G	T	T	A	A	A	T	G	T	C	T	G	A	T	A	A	A	T	T	T	T	A	A	A	A	C	C	A	T	T	C	T	G	G	G	C	T	G	G	A	G	A	T	A	T	A
pseFB	A	A	T	G	T	T	A	A	A	T	G	T	C	T	-	-	-	-	-	-	-	-	-	-	-	-	-	-	-	-	-	-	-	-	-	-	-	-	-	-	-	-	-	-	-	-	-	-	-
	-283	-282	-281	-280	-279	-278	-277	-276	-275	-274	-273	-272	-271	-270	-269	-268	-267	-266	-265	-264	-263	-262	-261	-260	-259	-258	-257	-256	-255	-254	-253	-252	-251	-250	-249	-248	-247	-246	-245	-244	-243	-242	-241	-240	-239	-238	-237	-236	-235
1	1	1	1	1	1	1	1	1	1	1	1	1	1	1	1	1	1	1	1	1	1	1	1	1	1	1	1	1	1	1	1	1	1	1	1	1	1	1	1	1	1	1	1	1	1	1	1	1	1
1	1	1	1	1	1	1	1	1	1	1	1	1	1	1	1	1	1	1	1	1	1	1	1	1	1	1	1	1	1	1	1	1	1	1	1	1	1	1	1	1	1	1	1	1	1	1	1	1	1
2	2	2	2	2	2	2	2	2	3	3	3	3	3	3	3	3	3	3	4	4	4	4	4	4	4	4	4	4	5	5	5	5	5	5	5	5	5	5	6	6	6	6	6	6	6	6	6	6	7
1	2	3	4	5	6	7	8	9	0	1	2	3	4	5	6	7	8	9	0	1	2	3	4	5	6	7	8	9	0	1	2	3	4	5	6	7	8	9	0	1	2	3	4	5	6	7	8	9	0
bog175	A	G	A	A	G	G	C	T	G	T	T	A	C	G	C	A	C	G	G	A	T	T	C	C	C	G	G	C	T	A	A	A	C	G	C	A	G	C	C	C	T	C	C	T	C	C	C	G	C
pse139	A	G	A	A	G	G	C	T	G	T	T	A	C	G	C	A	C	G	G	A	T	T	C	C	C	G	G	C	T	A	A	A	C	G	C	A	G	C	C	C	T	C	C	T	C	C	C	G	C
pseFB	-	-	-	-	-	-	-	-	-	-	-	-	-	-	-	-	-	-	-	-	-	-	-	-	-	-	-	-	-	-	-	-	-	-	-	-	-	-	-	-	-	-	-	-	-	-	-	-	-
	-203	-202	-201	-200	-199	-198	-197	-196	-195	-194	-193	-192	-191	-190	-189	-188	-187	-186	-185	-184	-183	-182	-181	-180	-179	-178	-177	-176	-175	-174	-173	-172	-171	-170	-169	-168	-167	-166	-165	-164	-163	-162	-161	-160	-159	-158	-157	-156	-155
1	1	1	1	1	1	1	1	1	1	1	1	1	1	1	1	1	1	1	1	1	1	1	1	1	1	1	1	1	1	1	1	1	1	1	1	1	1	1	1	1	1	1	1	1	1	1	1	1	1
2	2	2	2	2	2	2	2	2	2	2	2	2	2	2	2	2	2	2	2	2	2	2	2	2	2	2	2	2	2	2	2	2	2	2	2	2	2	2	2	2	2	2	2	2	2	2	2	2	2
0	0	0	0	0	0	0	0	0	1	1	1	1	1	1	1	1	1	1	2	2	2	2	2	2	2	2	2	2	3	3	3	3	3	3	3	3	3	3	4	4	4	4	4	4	4	4	4	4	5
1	2	3	4	5	6	7	8	9	0	1	2	3	4	5	6	7	8	9	0	1	2	3	4	5	6	7	8	9	0	1	2	3	4	5	6	7	8	9	0	1	2	3	4	5	6	7	8	9	0
bog175	C	G	T	T	A	A	C	C	G	A	A	T	A	G	A	G	G	G	A	A	T	T	A	G	A	A	G	T	G	G	A	T	G	T	A	A	T	A	T	G	G	T	A	G	A	G	G	G	A
pse139	C	G	T	T	A	A	C	C	G	A	A	T	A	G	A	G	G	G	A	A	T	T	A	G	A	A	G	T	G	G	A	T	G	T	A	A	T	A	T	A	G	T	A	G	A	G	G	G	A
pseFB	-	-	-	-	-	-	-	-	-	-	-	-	-	-	-	-	-	-	-	-	-	-	-	-	-	-	-	-	-	G	A	T	G	T	A	A	T	A	T	A	G	T	A	G	A	G	G	G	A
	-123	-122	-121	-120	-119	-118	-117	-116	-115	-114	-113	-112	-111	-110	-109	-108	-107	-106	-105	-104	-103	-102	-101	-100	-99	-98	-97	-96	-95	-94	-93	-92	-91	-90	-89	-88	-87	-86	-85	-84	-83	-82	-81	-80	-79	-78	-77	-76	-75
1	1	1	1	1	1	1	1	1	1	1	1	1	1	1	1	1	1	1	1	1	1	1	1	1	1	1	1	1	1	1	1	1	1	1	1	1	1	1	1	1	1	1	1	1	1	1	1	1	1
2	2	2	2	2	2	2	2	2	2	2	2	2	2	2	2	2	2	2	3	3	3	3	3	3	3	3	3	3	3	3	3	3	3	3	3	3	3	3	3	3	3	3	3	3	3	3	3	3	3
8	8	8	8	8	8	8	8	8	9	9	9	9	9	9	9	9	9	9	0	0	0	0	0	0	0	0	0	0	1	1	1	1	1	1	1	1	1	1	2	2	2	2	2	2	2	2	2	2	3
1	2	3	4	5	6	7	8	9	0	1	2	3	4	5	6	7	8	9	0	1	2	3	4	5	6	7	8	9	0	1	2	3	4	5	6	7	8	9	0	1	2	3	4	5	6	7	8	9	0
bog175	A	T	C	C	C	A	G	A	A	A	G	T	C	T	A	G	G	A	A	C	C	T	A	T	A	C	A	A	A	A	T	G	T	G	T	T	C	G	G	T	T	T	A	T	G	G	T	T	T
pse139	A	T	C	C	C	A	G	A	A	A	G	T	C	T	A	G	G	A	A	C	C	T	A	T	A	C	A	A	A	A	T	G	T	G	T	T	C	G	G	T	T	T	A	T	G	G	T	T	T
pseFB	A	T	C	C	C	A	G	A	A	A	G	T	C	T	A	G	G	A	A	C	C	T	A	T	A	C	A	A	A	A	T	G	T	G	T	T	C	G	G	T	T	T	A	T	G	G	T	T	T
	-43	-42	-41	-40	-39	-38	-37	-36	-35	-34	-33	-32	-31	-30	-29	-28	-27	-26	-25	-24	-23	-22	-21	-20	-19	-18	-17	-16	-15	-14	-13	-12	-11	-10	-9	-8	-7	-6	-5	-4	-3	-2	-1	1	2	3	4	5	6
1	1	1	1	1	1	1	1	1	1	1	1	1	1	1	1	1	1	1	1	1	1	1	1	1	1	1	1	1	1	1	1	1	1	1	1	1	1	1	1	1	1	1	1	1	1	1	1	1	1
3	3	3	3	3	3	3	3	3	3	3	3	3	3	3	3	3	3	3	3	3	3	3	3	3	3	3	3	3	3	3	3	3	3	3	3	3	3	3	4	4	4	4	4	4	4	4	4	4	4
6	6	6	6	6	6	6	6	6	7	7	7	7	7	7	7	7	7	7	8	8	8	8	8	8	8	8	8	8	9	9	9	9	9	9	9	9	9	9	0	0	0	0	0	0	0	0	0	0	1
1	2	3	4	5	6	7	8	9	0	1	2	3	4	5	6	7	8	9	0	1	2	3	4	5	6	7	8	9	0	1	2	3	4	5	6	7	8	9	0	1	2	3	4	5	6	7	8	9	0
bog175	G	T	A	T	T	A	C	A	G	A	T	G	T	G	C	C	T	A	C	A	G	C	C	C	C	C	C	C	T	C	A	G	C	C	T	C	A	G	A	A	A	A	A	T	C	A	C	G	A
pse139	G	T	A	T	T	A	A	A	G	A	T	G	T	G	C	C	T	A	C	A	G	C	C	C	C	C	C	C	T	C	A	G	C	C	T	C	A	G	A	A	A	A	A	T	C	A	C	G	A
pseFB	G	T	A	T	T	A	C	A	G	A	T	G	T	G	C	C	T	A	C	A	G	C	C	C	C	C	C	C	T	C	A	G	C	C	T	C	A	G	A	A	A	A	A	T	C	A	C	G	A
	38	39	40	41	42	43	44	45	46	47	48	49	50	51	52	53	54	55	56	57	58	59	60	61	62	63	64	65	66	67	68	69	70	71	72	73	74	75	76	77	78	79	80	81	82	83	84	85	86
1	1	1	1	1	1	1	1	1	1	1	1	1	1	1	1	1	1	1	1	1	1	1	1	1	1	1	1	1	1	1	1	1	1	1	1	1	1	1	1	1	1	1	1	1	1	1	1	1	1
4	4	4	4	4	4	4	4	4	4	4	4	4	4	4	4	4	4	4	4	4	4	4	4	4	4	4	4	4	4	4	4	4	4	4	4	4	4	4	4	4	4	4	4	4	4	4	4	4	4
4	4	4	4	4	4	4	4	4	5	5	5	5	5	5	5	5	5	5	6	6	6	6	6	6	6	6	6	6	7	7	7	7	7	7	7	7	7	7	8	8	8	8	8	8	8	8	8	8	9
1	2	3	4	5	6	7	8	9	0	1	2	3	4	5	6	7	8	9	0	1	2	3	4	5	6	7	8	9	0	1	2	3	4	5	6	7	8	9	0	1	2	3	4	5	6	7	8	9	0
bog175	T	C	A	G	A	C	C	A	C	T	G	T	C	C	A	A	T	A	C	C	A	T	G	A	G	C	C	A	C	C	G	G	A	T	A	A	A	T	C	C	G	A	T	G	C	C	G	A	C
pse139	T	C	A	G	A	C	C	A	C	T	G	T	C	C	A	A	T	A	C	C	A	T	G	A	G	C	C	A	C	C	G	G	A	T	A	A	A	T	C	C	G	A	T	G	C	C	G	A	C
pseFB	T	C	A	G	A	C	C	A	C	T	G	T	C	C	A	A	T	A	C	C	A	T	G	A	G	C	C	A	C	C	G	G	A	T	A	A	A	T	C	C	G	A	T	G	C	C	G	A	C
	118	119	120	121	122	123	124	125	126	127	128	129	130	131	132	133	134	135	136	137	138	139	140	141	142	143	144	145	146	147	148	149	150	151	152	153	154	155	156	157	158	159	160	161	162	163	164	165	166
1	1	1	1	1	1	1	1	1	1	1	1	1	1	1	1	1	1	1	1	1	1	1	1	1	1	1	1	1	1	1	1	1	1	1	1	1	1	1	1	1	1	1	1	1	1	1	1	1	1
5	5	5	5	5	5	5	5	5	5	5	5	5	5	5	5	5	5	5	5	5	5	5	5	5	5	5	5	5	5	5	5	5	5	5	5	5	5	5	5	5	5	5	5	5	5	5	5	5	5
2	2	2	2	2	2	2	2	2	3	3	3	3	3	3	3	3	3	3	4	4	4	4	4	4	4	4	4	4	5	5	5	5	5	5	5	5	5	5	6	6	6	6	6	6	6	6	6	6	7
1	2	3	4	5	6	7	8	9	0	1	2	3	4	5	6	7	8	9	0	1	2	3	4	5	6	7	8	9	0	1	2	3	4	5	6	7	8	9	0	1	2	3	4	5	6	7	8	9	0
bog175	A	T	G	G	A	T	T	G	C	G	T	G	C	C	A	T	G	C	T	G	A	T	A	T	C	A	G	T	G	C	C	T	C	C	T	C	A	T	A	A	T	A	T	A	G	A	C	C	A
pse139	A	T	G	G	A	T	T	G	C	G	T	G	C	C	A	T	G	C	T	G	A	T	A	T	C	A	G	T	G	C	C	T	C	C	C	C	A	T	A	A	T	A	T	A	G	A	C	C	A
pseFB	A	T	G	G	A	T	T	G	C	G	T	G	C	C	A	T	G	C	T	G	A	T	A	T	C	A	G	T	G	C	C	T	C	C	C	C	A	T	A	A	T	A	T	A	G	A	C	C	A
	198	199	200	201	202	203	204	205	206	207	208	209	210	211	212	213	214	215	216	217	218	219	220	221	222	223	224	225	226	227	228	229	230	231	232	233	234	235	236	237	238	239	240	241	242	243	244	245	246
1	1	1	1	1	1	1	1	1	1	1	1	1	1	1	1	1	1	1	1	1	1	1	1	1	1	1	1	1	1	1	1	1	1	1	1	1	1	1	1	1	1	1	1	1	1	1	1	1	1
6	6	6	6	6	6	6	6	6	6	6	6	6	6	6	6	6	6	6	6	6	6	6	6	6	6	6	6	6	6	6	6	6	6	6	6	6	6	6	6	6	6	6	6	6	6	6	6	6	6
0	0	0	0	0	0	0	0	0	1	1	1	1	1	1	1	1	1	1	2	2	2	2	2	2	2	2	2	2	3	3	3	3	3	3	3	3	3	3	4	4	4	4	4	4	4	4	4	4	5
1	2	3	4	5	6	7	8	9	0	1	2	3	4	5	6	7	8	9	0	1	2	3	4	5	6	7	8	9	0	1	2	3	4	5	6	7	8	9	0	1	2	3	4	5	6	7	8	9	0
bog175	A	G	T	G	G	T	A	G	T	G	A	G	A	G	T	T	T	C	A	A	G	C	C	A	T	C	G	G	T	G	G	A	G	C	A	C	C	C	T	A	G	T	G	G	A	G	G	T	A
pse139	A	G	T	G	G	T	A	G	T	G	A	G	A	G	T	T	T	C	A	A	G	C	C	A	T	C	G	G	T	G	G	A	G	C	A	C	C	C	T	A	G	T	G	G	A	R	G	T	A
pseFB	A	G	T	G	G	T	A	G	T	G	A	G	A	G	T	T	T	C	A	A	G	C	C	A	T	C	G	G	T	G	G	A	G	C	A	C	C	C	T	A	G	T	G	G	A	A	G	T	A
	278	279	280	281	282	283	284	285	286	287	288	289	290	291	292	293	294	295	296	297	298	299	300	301	302	303	304	305	306	307	308	309	310	311	312	313	314	315	316	317	318	319	320	321	322	323	324	325	326
1	1	1	1	1	1	1	1	1	1	1	1	1	1	1	1	1	1	1	1	1	1	1	1	1	1	1	1	1	1	1	1	1	1	1	1	1	1	1	1	1	1	1	1	1	1	1	1	1	1
6	6	6	6	6	6	6	6	6	6	6	6	6	6	6	6	6	6	6	7	7	7	7	7	7	7	7	7	7	7	7	7	7	7	7	7	7	7	7	7	7	7	7	7	7	7	7	7	7	7
8	8	8	8	8	8	8	8	8	9	9	9	9	9	9	9	9	9	9	0	0	0	0	0	0	0	0	0	0	1	1	1	1	1	1	1	1	1	1	2	2	2	2	2	2	2	2	2	2	3
1	2	3	4	5	6	7	8	9	0	1	2	3	4	5	6	7	8	9	0	1	2	3	4	5	6	7	8	9	0	1	2	3	4	5	6	7	8	9	0	1	2	3	4	5	6	7	8	9	0
bog175	G	G	G	A	T	C	C	T	T	T	A	G	C	G	A	G	C	C	G	C	G	A	C	A	G	T	A	T	C	A	G	G	G	A	A	T	G	G	C	G	C	A	C	T	T	T	C	T	G
pse139	G	G	G	A	T	C	C	T	T	T	A	G	C	G	A	G	C	C	G	C	G	A	C	A	G	T	A	T	C	A	G	G	G	A	A	T	G	G	C	G	C	A	C	T	T	T	C	T	G
pseFB	G	G	G	A	T	C	C	T	T	T	A	G	C	G	A	G	C	C	G	C	G	A	C	A	G	T	A	T	C	A	G	G	G	A	A	T	G	G	C	G	C	A	C	T	T	T	C	T	G
	358	359	360	361	362	363	364	365	366	367	368	369	370	371	372	373	374	375	376	377	378	379	380	381	382	383	384	385	386	387	388	389	390	391	392	393	394	395	396	397	398	399	400	401	402	403	404	405	406
1	1	1	1	1	1	1	1	1	1	1	1	1	1	1	1	1	1	1	1	1	1	1	1	1	1	1	1	1	1	1	1	1	1	1	1	1	1	1	1	1	1	1	1	1	1	1	1	1	1
7	7	7	7	7	7	7	7	7	7	7	7	7	7	7	7	7	7	7	7	7	7	7	7	7	7	7	7	7	7	7	7	7	7	7	7	7	7	7	8	8	8	8	8	8	8	8	8	8	8
6	6	6	6	6	6	6	6	6	7	7	7	7	7	7	7	7	7	7	8	8	8	8	8	8	8	8	8	8	9	9	9	9	9	9	9	9	9	9	0	0	0	0	0	0	0	0	0	0	1
1	2	3	4	5	6	7	8	9	0	1	2	3	4	5	6	7	8	9	0	1	2	3	4	5	6	7	8	9	0	1	2	3	4	5	6	7	8	9	0	1	2	3	4	5	6	7	8	9	0
bog175	A	T	C	C	G	A	T	T	G	A	A	A	A	C	G	A	A	T	T	T	G	A	T	G	C	A	T	A	C	T	T	A	A	A	G	A	A	A	A	A	C	G	G	C	G	G	C	T	T
pse139	A	T	C	C	G	A	T	T	G	A	A	A	A	C	G	A	A	T	T	T	G	A	T	G	C	A	T	A	C	T	T	A	A	A	G	A	A	A	A	A	C	G	G	C	G	G	C	T	T
pseFB	A	C	C	C	G	A	T	T	G	A	A	A	A	C	G	A	A	T	T	T	G	A	T	G	C	A	T	A	C	T	T	A	A	A	G	A	A	A	A	A	C	G	G	C	G	G	C	T	T
	438	439	440	441	442	443	444	445	446	447	448	449	450	451	452	453	454	455	456	457	458	459	460	461	462	463	464	465	466	467	468	469	470	471	472	473	474	475	476	477	478	479	480	481	482	483	484	485	486
1	1
8	8
4	4
1	2
bog175	T
pse139	T
pseFB	T
	518
	Positions
SRX	-1055	-459	-453	-445	-427	-351	-313
204748	p
204749	p					b	b
204750	b
204751	p
204752	p
204753	p				p
204754	p
204755	p
204756	p					b	b
204757	b
204758	b
204759	b
204760	b	b	b	b		p	p
204761	b
204762	b
204763	p
204764	b
204765	b
204766	p
204767	b
204768	b
204769	b
204770	b
204771	p
204772	p
204773	p
204774	p
204775	b
204776	b
204777	p
204778	b		b	b	b	p	p
204779	p					b	b
204780	p
204782	b
204783	b
204784	b
204785	b
204787	b
204789	b
204790	b	p	p	p	p
204791	b
204792	b	b	b	b	b
[truncated: 31 more columns]

## Sheet: GA24796
Note: Highlighted in blue are exonic regions before the start of the CDS that are interruped by introns.
GA24796 (-1091>+509)
									1	1	1	1	1	1	1	1	1	1	2	2	2	2	2	2	2	2	2	2	3	3	3	3	3	3	3	3	3	3	4	4	4	4	4	4	4	4	4	4	5
1	2	3	4	5	6	7	8	9	0	1	2	3	4	5	6	7	8	9	0	1	2	3	4	5	6	7	8	9	0	1	2	3	4	5	6	7	8	9	0	1	2	3	4	5	6	7	8	9	0
bog175	T	T	C	A	T	A	T	G	C	G	G	C	G	A	T	T	G	T	T	C	A	G	T	G	G	C	C	A	G	C	T	A	T	A	T	A	T	C	A	G	A	G	A	T	A	T	A	T	A
pse139	T	T	C	A	T	A	T	G	C	G	G	C	G	A	T	T	G	T	T	C	A	G	T	G	G	C	C	A	G	C	T	A	T	A	T	A	T	C	A	G	A	G	A	T	A	T	A	T	A
pse FB	T	T	C	A	T	A	T	G	C	G	G	C	G	A	T	T	G	T	T	C	A	G	T	G	G	C	C	A	G	C	T	A	T	A	T	A	T	C	A	G	A	G	A	T	A	T	A	T	A
	-1091	-1090	-1089	-1088	-1087	-1086	-1085	-1084	-1083	-1082	-1081	-1080	-1079	-1078	-1077	-1076	-1075	-1074	-1073	-1072	-1071	-1070	-1069	-1068	-1067	-1066	-1065	-1064	-1063	-1062	-1061	-1060	-1059	-1058	-1057	-1056	-1055	-1054	-1053	-1052	-1051	-1050	-1049	-1048	-1047	-1046	-1045	-1044	-1043
																			1	1	1	1	1	1	1	1	1	1	1	1	1	1	1	1	1	1	1	1	1	1	1	1	1	1	1	1	1	1	1
8	8	8	8	8	8	8	8	8	9	9	9	9	9	9	9	9	9	9	0	0	0	0	0	0	0	0	0	0	1	1	1	1	1	1	1	1	1	1	2	2	2	2	2	2	2	2	2	2	3
1	2	3	4	5	6	7	8	9	0	1	2	3	4	5	6	7	8	9	0	1	2	3	4	5	6	7	8	9	0	1	2	3	4	5	6	7	8	9	0	1	2	3	4	5	6	7	8	9	0
bog175	A	A	T	A	T	T	T	T	G	A	A	T	A	T	A	T	T	A	A	A	T	C	T	G	A	G	A	T	T	T	A	T	A	T	G	C	A	A	G	T	A	T	G	T	T	G	A	G	C
pse139	A	A	T	A	T	T	T	T	G	A	A	T	A	T	A	T	T	A	A	A	T	C	T	G	A	G	A	T	T	T	A	T	A	T	G	C	A	A	G	T	A	T	G	T	T	G	A	G	C
pse FB	A	A	T	A	T	T	T	T	G	A	A	T	A	T	A	T	T	A	A	A	T	C	T	G	A	G	A	T	T	T	A	T	A	T	G	A	A	C	G	T	A	T	A	T	T	G	A	G	C
	-1011	-1010	-1009	-1008	-1007	-1006	-1005	-1004	-1003	-1002	-1001	-1000	-999	-998	-997	-996	-995	-994	-993	-992	-991	-990	-989	-988	-987	-986	-985	-984	-983	-982	-981	-980	-979	-978	-977	-976	-975	-974	-973	-972	-971	-970	-969	-968	-967	-966	-965	-964	-963
1	1	1	1	1	1	1	1	1	1	1	1	1	1	1	1	1	1	1	1	1	1	1	1	1	1	1	1	1	1	1	1	1	1	1	1	1	1	1	2	2	2	2	2	2	2	2	2	2	2
6	6	6	6	6	6	6	6	6	7	7	7	7	7	7	7	7	7	7	8	8	8	8	8	8	8	8	8	8	9	9	9	9	9	9	9	9	9	9	0	0	0	0	0	0	0	0	0	0	1
1	2	3	4	5	6	7	8	9	0	1	2	3	4	5	6	7	8	9	0	1	2	3	4	5	6	7	8	9	0	1	2	3	4	5	6	7	8	9	0	1	2	3	4	5	6	7	8	9	0
bog175	G	C	T	T	G	A	A	A	G	G	C	A	A	T	T	G	G	C	A	G	T	G	C	T	T	A	C	T	T	G	G	T	A	C	A	A	A	C	G	T	A	C	T	G	G	G	A	A	A
pse139	G	C	T	T	G	A	A	A	G	G	C	A	A	T	T	G	G	C	A	G	T	G	C	T	T	A	C	T	T	G	G	T	A	C	A	A	A	C	G	T	A	C	T	G	G	G	A	A	A
pse FB	A	C	T	T	G	A	A	A	G	G	C	A	A	T	T	G	G	C	A	T	T	C	T	T	T	A	C	T	T	G	G	T	A	C	A	A	A	C	G	T	A	T	T	G	G	G	A	A	A
	-931	-930	-929	-928	-927	-926	-925	-924	-923	-922	-921	-920	-919	-918	-917	-916	-915	-914	-913	-912	-911	-910	-909	-908	-907	-906	-905	-904	-903	-902	-901	-900	-899	-898	-897	-896	-895	-894	-893	-892	-891	-890	-889	-888	-887	-886	-885	-884	-883
2	2	2	2	2	2	2	2	2	2	2	2	2	2	2	2	2	2	2	2	2	2	2	2	2	2	2	2	2	2	2	2	2	2	2	2	2	2	2	2	2	2	2	2	2	2	2	2	2	2
4	4	4	4	4	4	4	4	4	5	5	5	5	5	5	5	5	5	5	6	6	6	6	6	6	6	6	6	6	7	7	7	7	7	7	7	7	7	7	8	8	8	8	8	8	8	8	8	8	9
1	2	3	4	5	6	7	8	9	0	1	2	3	4	5	6	7	8	9	0	1	2	3	4	5	6	7	8	9	0	1	2	3	4	5	6	7	8	9	0	1	2	3	4	5	6	7	8	9	0
bog175	T	A	T	G	T	A	A	A	G	A	C	G	G	A	A	A	A	T	A	T	T	G	A	T	T	A	T	A	T	G	C	T	T	C	T	A	T	A	T	A	T	A	T	A	T	A	T	A	A
pse139	T	A	T	G	T	A	A	A	G	A	C	T	G	A	A	A	A	T	A	T	T	G	A	T	T	A	T	A	T	G	C	T	T	C	T	A	T	A	T	-	-	-	-	-	-	-	-	-	-
pse FB	T	A	T	G	T	G	A	A	G	A	C	T	G	A	A	A	A	T	A	T	T	G	A	T	T	A	T	A	T	G	C	T	T	C	T	A	T	A	T	A	C	A	T	A	T	A	T	A	A
	-851	-850	-849	-848	-847	-846	-845	-844	-843	-842	-841	-840	-839	-838	-837	-836	-835	-834	-833	-832	-831	-830	-829	-828	-827	-826	-825	-824	-823	-822	-821	-820	-819	-818	-817	-816	-815	-814	-813	-812	-811	-810	-809	-808	-807	-806	-805	-804	-803
3	3	3	3	3	3	3	3	3	3	3	3	3	3	3	3	3	3	3	3	3	3	3	3	3	3	3	3	3	3	3	3	3	3	3	3	3	3	3	3	3	3	3	3	3	3	3	3	3	3
2	2	2	2	2	2	2	2	2	3	3	3	3	3	3	3	3	3	3	4	4	4	4	4	4	4	4	4	4	5	5	5	5	5	5	5	5	5	5	6	6	6	6	6	6	6	6	6	6	7
1	2	3	4	5	6	7	8	9	0	1	2	3	4	5	6	7	8	9	0	1	2	3	4	5	6	7	8	9	0	1	2	3	4	5	6	7	8	9	0	1	2	3	4	5	6	7	8	9	0
bog175	C	A	C	A	A	G	G	T	A	A	T	A	C	C	C	A	G	G	A	T	T	T	C	G	C	G	A	A	G	G	G	G	G	G	G	T	T	A	A	A	A	T	A	G	G	T	T	T	C
pse139	C	A	C	A	A	G	G	T	A	A	T	A	C	C	C	A	G	G	A	T	T	T	C	G	C	G	A	A	G	G	G	G	G	G	G	T	T	A	A	A	A	T	A	G	G	T	T	T	C
pse FB	C	A	C	A	A	G	A	T	A	A	T	A	C	C	C	A	G	G	A	T	T	T	C	G	A	G	A	A	G	G	G	G	G	G	G	T	T	A	A	A	A	T	A	G	G	T	T	T	C
	-771	-770	-769	-768	-767	-766	-765	-764	-763	-762	-761	-760	-759	-758	-757	-756	-755	-754	-753	-752	-751	-750	-749	-748	-747	-746	-745	-744	-743	-742	-741	-740	-739	-738	-737	-736	-735	-734	-733	-732	-731	-730	-729	-728	-727	-726	-725	-724	-723
4	4	4	4	4	4	4	4	4	4	4	4	4	4	4	4	4	4	4	4	4	4	4	4	4	4	4	4	4	4	4	4	4	4	4	4	4	4	4	4	4	4	4	4	4	4	4	4	4	4
0	0	0	0	0	0	0	0	0	1	1	1	1	1	1	1	1	1	1	2	2	2	2	2	2	2	2	2	2	3	3	3	3	3	3	3	3	3	3	4	4	4	4	4	4	4	4	4	4	5
1	2	3	4	5	6	7	8	9	0	1	2	3	4	5	6	7	8	9	0	1	2	3	4	5	6	7	8	9	0	1	2	3	4	5	6	7	8	9	0	1	2	3	4	5	6	7	8	9	0
bog175	T	T	T	A	A	A	A	C	C	A	A	T	A	A	A	A	C	C	A	T	T	T	T	A	A	C	T	A	C	C	A	A	A	G	T	T	C	G	C	T	T	T	C	T	C	A	T	A	A
pse139	T	T	T	A	A	A	A	C	C	A	A	T	A	A	A	A	C	C	A	T	T	T	T	A	A	C	T	A	C	C	A	A	A	G	T	T	C	G	C	T	T	T	C	T	C	A	T	A	A
pse FB	T	T	T	A	A	A	A	C	C	A	A	T	A	A	A	A	C	C	A	T	T	T	T	A	A	C	T	A	C	C	A	A	A	G	T	T	C	G	C	T	T	T	C	T	C	A	T	A	A
	-691	-690	-689	-688	-687	-686	-685	-684	-683	-682	-681	-680	-679	-678	-677	-676	-675	-674	-673	-672	-671	-670	-669	-668	-667	-666	-665	-664	-663	-662	-661	-660	-659	-658	-657	-656	-655	-654	-653	-652	-651	-650	-649	-648	-647	-646	-645	-644	-643
4	4	4	4	4	4	4	4	4	4	4	4	4	4	4	4	4	4	4	5	5	5	5	5	5	5	5	5	5	5	5	5	5	5	5	5	5	5	5	5	5	5	5	5	5	5	5	5	5	5
8	8	8	8	8	8	8	8	8	9	9	9	9	9	9	9	9	9	9	0	0	0	0	0	0	0	0	0	0	1	1	1	1	1	1	1	1	1	1	2	2	2	2	2	2	2	2	2	2	3
1	2	3	4	5	6	7	8	9	0	1	2	3	4	5	6	7	8	9	0	1	2	3	4	5	6	7	8	9	0	1	2	3	4	5	6	7	8	9	0	1	2	3	4	5	6	7	8	9	0
bog175	A	A	A	A	T	C	A	A	G	T	C	C	A	A	C	A	C	A	C	T	T	C	A	G	A	T	G	C	A	A	C	T	C	A	A	G	A	T	T	T	T	T	G	C	G	G	C	T	A
pse139	A	A	A	A	T	C	A	A	G	T	C	C	A	A	C	A	C	A	C	T	T	C	A	G	A	T	G	C	A	A	C	T	C	A	A	G	A	T	T	T	T	T	G	C	G	G	C	T	A
pse FB	A	A	A	A	T	C	A	A	G	T	C	C	A	A	C	A	C	A	C	T	T	C	A	G	A	T	G	C	A	A	C	T	C	A	A	G	A	T	-	-	-	-	-	-	-	-	C	C	A
	-611	-610	-609	-608	-607	-606	-605	-604	-603	-602	-601	-600	-599	-598	-597	-596	-595	-594	-593	-592	-591	-590	-589	-588	-587	-586	-585	-584	-583	-582	-581	-580	-579	-578	-577	-576	-575	-574	-573	-572	-571	-570	-569	-568	-567	-566	-565	-564	-563
5	5	5	5	5	5	5	5	5	5	5	5	5	5	5	5	5	5	5	5	5	5	5	5	5	5	5	5	5	5	5	5	5	5	5	5	5	5	5	6	6	6	6	6	6	6	6	6	6	6
6	6	6	6	6	6	6	6	6	7	7	7	7	7	7	7	7	7	7	8	8	8	8	8	8	8	8	8	8	9	9	9	9	9	9	9	9	9	9	0	0	0	0	0	0	0	0	0	0	1
1	2	3	4	5	6	7	8	9	0	1	2	3	4	5	6	7	8	9	0	1	2	3	4	5	6	7	8	9	0	1	2	3	4	5	6	7	8	9	0	1	2	3	4	5	6	7	8	9	0
bog175	A	A	A	A	A	C	A	A	C	A	A	A	C	T	C	T	T	C	A	A	T	T	A	T	T	T	T	C	A	T	T	G	G	G	C	C	T	T	G	G	T	A	A	A	A	C	A	A	G
pse139	A	A	A	A	A	C	A	A	C	A	A	A	C	T	C	T	T	C	A	A	T	T	A	T	T	T	T	C	A	T	T	G	G	G	C	C	T	T	G	G	T	A	A	A	A	C	A	A	G
pse FB	-	-	-	-	-	-	-	-	-	-	-	-	-	-	-	-	-	-	-	-	-	-	-	-	-	-	-	-	-	-	-	-	-	-	-	-	-	-	-	-	-	-	-	-	-	-	-	-	-
	-531	-530	-529	-528	-527	-526	-525	-524	-523	-522	-521	-520	-519	-518	-517	-516	-515	-514	-513	-512	-511	-510	-509	-508	-507	-506	-505	-504	-503	-502	-501	-500	-499	-498	-497	-496	-495	-494	-493	-492	-491	-490	-489	-488	-487	-486	-485	-484	-483
6	6	6	6	6	6	6	6	6	6	6	6	6	6	6	6	6	6	6	6	6	6	6	6	6	6	6	6	6	6	6	6	6	6	6	6	6	6	6	6	6	6	6	6	6	6	6	6	6	6
4	4	4	4	4	4	4	4	4	5	5	5	5	5	5	5	5	5	5	6	6	6	6	6	6	6	6	6	6	7	7	7	7	7	7	7	7	7	7	8	8	8	8	8	8	8	8	8	8	9
1	2	3	4	5	6	7	8	9	0	1	2	3	4	5	6	7	8	9	0	1	2	3	4	5	6	7	8	9	0	1	2	3	4	5	6	7	8	9	0	1	2	3	4	5	6	7	8	9	0
bog175	T	T	A	A	A	A	A	A	A	A	T	T	T	A	A	G	T	A	A	A	C	A	T	A	C	C	C	C	T	C	T	G	G	G	T	A	C	A	T	C	C	T	T	G	C	C	T	C	T
pse139	T	T	A	A	A	A	A	A	A	A	T	T	T	A	A	G	T	A	A	A	C	A	T	A	C	C	C	C	T	C	T	G	G	G	T	A	C	A	T	C	C	T	T	G	C	C	T	C	T
pse FB	T	T	T	A	A	A	A	A	A	A	T	T	T	A	A	T	T	A	A	A	C	A	T	A	C	C	C	C	T	A	T	G	G	G	T	A	C	G	C	C	C	T	T	G	C	C	T	C	T
	-451	-450	-449	-448	-447	-446	-445	-444	-443	-442	-441	-440	-439	-438	-437	-436	-435	-434	-433	-432	-431	-430	-429	-428	-427	-426	-425	-424	-423	-422	-421	-420	-419	-418	-417	-416	-415	-414	-413	-412	-411	-410	-409	-408	-407	-406	-405	-404	-403
7	7	7	7	7	7	7	7	7	7	7	7	7	7	7	7	7	7	7	7	7	7	7	7	7	7	7	7	7	7	7	7	7	7	7	7	7	7	7	7	7	7	7	7	7	7	7	7	7	7
2	2	2	2	2	2	2	2	2	3	3	3	3	3	3	3	3	3	3	4	4	4	4	4	4	4	4	4	4	5	5	5	5	5	5	5	5	5	5	6	6	6	6	6	6	6	6	6	6	7
1	2	3	4	5	6	7	8	9	0	1	2	3	4	5	6	7	8	9	0	1	2	3	4	5	6	7	8	9	0	1	2	3	4	5	6	7	8	9	0	1	2	3	4	5	6	7	8	9	0
bog175	T	C	A	A	A	A	A	C	T	T	A	T	C	G	G	A	A	G	A	T	A	C	G	A	A	A	A	A	T	A	A	A	A	A	G	T	A	C	C	A	T	G	A	A	C	A	T	A	A
pse139	T	C	A	A	A	A	A	C	T	T	A	T	C	G	G	A	A	G	A	T	A	C	G	A	A	A	A	A	T	A	A	A	A	A	G	T	A	C	C	A	T	G	A	A	C	A	T	A	A
pse FB	T	C	A	A	A	A	A	C	T	T	A	T	C	G	G	A	A	G	A	T	A	C	G	A	A	A	A	A	T	A	A	A	A	A	G	T	A	C	C	A	T	G	A	A	C	A	T	A	A
	-371	-370	-369	-368	-367	-366	-365	-364	-363	-362	-361	-360	-359	-358	-357	-356	-355	-354	-353	-352	-351	-350	-349	-348	-347	-346	-345	-344	-343	-342	-341	-340	-339	-338	-337	-336	-335	-334	-333	-332	-331	-330	-329	-328	-327	-326	-325	-324	-323
8	8	8	8	8	8	8	8	8	8	8	8	8	8	8	8	8	8	8	8	8	8	8	8	8	8	8	8	8	8	8	8	8	8	8	8	8	8	8	8	8	8	8	8	8	8	8	8	8	8
0	0	0	0	0	0	0	0	0	1	1	1	1	1	1	1	1	1	1	2	2	2	2	2	2	2	2	2	2	3	3	3	3	3	3	3	3	3	3	4	4	4	4	4	4	4	4	4	4	5
1	2	3	4	5	6	7	8	9	0	1	2	3	4	5	6	7	8	9	0	1	2	3	4	5	6	7	8	9	0	1	2	3	4	5	6	7	8	9	0	1	2	3	4	5	6	7	8	9	0
bog175	A	T	G	T	A	C	A	T	A	T	G	T	T	T	A	G	T	C	T	T	G	G	C	G	A	C	A	T	A	T	G	T	A	T	G	T	A	T	A	T	A	T	G	T	A	T	G	T	A
pse139	A	T	G	T	A	C	A	T	A	T	G	T	T	T	A	G	T	C	T	T	G	G	C	G	A	C	A	T	A	T	G	T	A	T	G	T	A	T	A	T	A	T	G	T	A	T	G	T	A
pse FB	A	T	G	T	A	C	A	T	A	T	G	A	A	T	A	G	T	C	T	T	G	G	C	G	A	C	A	T	G	T	G	T	A	T	G	T	A	T	A	T	A	T	G	T	A	T	G	T	A
	-291	-290	-289	-288	-287	-286	-285	-284	-283	-282	-281	-280	-279	-278	-277	-276	-275	-274	-273	-272	-271	-270	-269	-268	-267	-266	-265	-264	-263	-262	-261	-260	-259	-258	-257	-256	-255	-254	-253	-252	-251	-250	-249	-248	-247	-246	-245	-244	-243
8	8	8	8	8	8	8	8	8	8	8	8	8	8	8	8	8	8	8	9	9	9	9	9	9	9	9	9	9	9	9	9	9	9	9	9	9	9	9	9	9	9	9	9	9	9	9	9	9	9
8	8	8	8	8	8	8	8	8	9	9	9	9	9	9	9	9	9	9	0	0	0	0	0	0	0	0	0	0	1	1	1	1	1	1	1	1	1	1	2	2	2	2	2	2	2	2	2	2	3
1	2	3	4	5	6	7	8	9	0	1	2	3	4	5	6	7	8	9	0	1	2	3	4	5	6	7	8	9	0	1	2	3	4	5	6	7	8	9	0	1	2	3	4	5	6	7	8	9	0
bog175	A	G	C	A	A	T	T	T	T	T	G	A	G	C	T	A	G	G	G	A	C	A	G	G	T	G	T	A	T	A	G	A	T	T	T	C	T	G	T	T	T	A	T	A	T	G	G	G	A
pse139	A	G	C	A	A	T	T	T	T	T	G	A	G	C	T	A	G	G	G	A	C	A	G	G	T	G	T	A	T	A	G	A	T	T	T	C	T	G	T	T	T	A	T	A	T	G	G	G	A
pse FB	A	G	C	A	A	T	T	T	T	T	G	C	G	C	T	A	G	G	G	A	C	A	G	G	T	G	T	A	T	A	G	A	T	T	G	C	T	G	T	T	T	A	T	A	T	G	G	G	A
	-211	-210	-209	-208	-207	-206	-205	-204	-203	-202	-201	-200	-199	-198	-197	-196	-195	-194	-193	-192	-191	-190	-189	-188	-187	-186	-185	-184	-183	-182	-181	-180	-179	-178	-177	-176	-175	-174	-173	-172	-171	-170	-169	-168	-167	-166	-165	-164	-163
																																							1	1	1	1	1	1	1	1	1	1	1
9	9	9	9	9	9	9	9	9	9	9	9	9	9	9	9	9	9	9	9	9	9	9	9	9	9	9	9	9	9	9	9	9	9	9	9	9	9	9	0	0	0	0	0	0	0	0	0	0	0
6	6	6	6	6	6	6	6	6	7	7	7	7	7	7	7	7	7	7	8	8	8	8	8	8	8	8	8	8	9	9	9	9	9	9	9	9	9	9	0	0	0	0	0	0	0	0	0	0	1
1	2	3	4	5	6	7	8	9	0	1	2	3	4	5	6	7	8	9	0	1	2	3	4	5	6	7	8	9	0	1	2	3	4	5	6	7	8	9	0	1	2	3	4	5	6	7	8	9	0
bog175	A	G	A	A	G	G	A	A	A	A	G	A	C	G	G	G	A	A	G	T	A	A	T	C	A	A	A	A	C	T	G	C	T	T	C	A	G	A	T	A	A	A	G	C	A	C	A	T	T
pse139	A	G	A	A	G	G	A	A	A	A	G	A	C	G	G	G	A	A	G	T	A	A	T	C	A	A	A	A	C	T	G	C	T	T	C	A	G	A	T	A	A	A	G	C	A	C	A	T	T
pse FB	A	G	A	A	G	G	A	A	A	A	G	A	C	G	G	G	A	A	G	T	A	A	T	C	A	A	A	A	C	T	G	C	T	T	C	A	G	A	T	A	A	A	A	C	A	C	A	T	T
	-131	-130	-129	-128	-127	-126	-125	-124	-123	-122	-121	-120	-119	-118	-117	-116	-115	-114	-113	-112	-111	-110	-109	-108	-107	-106	-105	-104	-103	-102	-101	-100	-99	-98	-97	-96	-95	-94	-93	-92	-91	-90	-89	-88	-87	-86	-85	-84	-83
1	1	1	1	1	1	1	1	1	1	1	1	1	1	1	1	1	1	1	1	1	1	1	1	1	1	1	1	1	1	1	1	1	1	1	1	1	1	1	1	1	1	1	1	1	1	1	1	1	1
0	0	0	0	0	0	0	0	0	0	0	0	0	0	0	0	0	0	0	0	0	0	0	0	0	0	0	0	0	0	0	0	0	0	0	0	0	0	0	0	0	0	0	0	0	0	0	0	0	0
4	4	4	4	4	4	4	4	4	5	5	5	5	5	5	5	5	5	5	6	6	6	6	6	6	6	6	6	6	7	7	7	7	7	7	7	7	7	7	8	8	8	8	8	8	8	8	8	8	9
1	2	3	4	5	6	7	8	9	0	1	2	3	4	5	6	7	8	9	0	1	2	3	4	5	6	7	8	9	0	1	2	3	4	5	6	7	8	9	0	1	2	3	4	5	6	7	8	9	0
bog175	T	T	T	T	C	A	G	A	T	C	C	G	A	A	A	T	T	T	C	C	A	T	G	A	G	T	A	G	T	T	T	G	T	A	T	A	G	T	T	A	T	G	A	A	C	C	A	A	A
pse139	T	T	T	T	C	A	G	A	T	C	C	G	A	A	A	T	T	T	C	C	A	T	G	A	G	T	A	G	T	T	T	G	T	A	T	A	G	T	T	A	T	G	A	A	C	C	A	A	A
pse FB	T	T	T	T	C	A	G	A	T	C	C	G	A	A	A	T	T	T	C	C	A	T	G	A	G	T	A	G	T	T	T	G	T	A	T	A	G	T	T	A	T	G	A	A	C	C	A	A	A
	-51	-50	-49	-48	-47	-46	-45	-44	-43	-42	-41	-40	-39	-38	-37	-36	-35	-34	-33	-32	-31	-30	-29	-28	-27	-26	-25	-24	-23	-22	-21	-20	-19	-18	-17	-16	-15	-14	-13	-12	-11	-10	-9	-8	-7	-6	-5	-4	-3
1	1	1	1	1	1	1	1	1	1	1	1	1	1	1	1	1	1	1	1	1	1	1	1	1	1	1	1	1	1	1	1	1	1	1	1	1	1	1	1	1	1	1	1	1	1	1	1	1	1
1	1	1	1	1	1	1	1	1	1	1	1	1	1	1	1	1	1	1	1	1	1	1	1	1	1	1	1	1	1	1	1	1	1	1	1	1	1	1	1	1	1	1	1	1	1	1	1	1	1
2	2	2	2	2	2	2	2	2	3	3	3	3	3	3	3	3	3	3	4	4	4	4	4	4	4	4	4	4	5	5	5	5	5	5	5	5	5	5	6	6	6	6	6	6	6	6	6	6	7
1	2	3	4	5	6	7	8	9	0	1	2	3	4	5	6	7	8	9	0	1	2	3	4	5	6	7	8	9	0	1	2	3	4	5	6	7	8	9	0	1	2	3	4	5	6	7	8	9	0
bog175	A	G	A	G	T	T	T	A	A	G	G	C	T	A	A	A	A	G	G	C	A	A	T	G	A	A	C	A	T	A	C	A	T	T	A	A	T	T	A	A	T	T	A	A	T	T	A	A	T
pse139	A	G	A	G	T	T	T	A	A	G	G	C	T	A	A	A	A	G	G	C	A	A	T	G	A	A	C	A	T	A	C	A	T	T	A	A	T	T	A	A	T	T	A	A	T	T	A	A	T
pse FB	A	G	A	G	T	T	T	G	A	G	G	C	T	A	A	A	A	G	A	C	A	A	T	G	A	A	C	A	T	A	C	-	-	-	-	-	-	-	-	A	T	T	A	A	T	T	A	A	T
	30	31	32	33	34	35	36	37	38	39	40	41	42	43	44	45	46	47	48	49	50	51	52	53	54	55	56	57	58	59	60	61	62	63	64	65	66	67	68	69	70	71	72	73	74	75	76	77	78
1	1	1	1	1	1	1	1	1	1	1	1	1	1	1	1	1	1	1	1	1	1	1	1	1	1	1	1	1	1	1	1	1	1	1	1	1	1	1	1	1	1	1	1	1	1	1	1	1	1
2	2	2	2	2	2	2	2	2	2	2	2	2	2	2	2	2	2	2	2	2	2	2	2	2	2	2	2	2	2	2	2	2	2	2	2	2	2	2	2	2	2	2	2	2	2	2	2	2	2
0	0	0	0	0	0	0	0	0	1	1	1	1	1	1	1	1	1	1	2	2	2	2	2	2	2	2	2	2	3	3	3	3	3	3	3	3	3	3	4	4	4	4	4	4	4	4	4	4	5
1	2	3	4	5	6	7	8	9	0	1	2	3	4	5	6	7	8	9	0	1	2	3	4	5	6	7	8	9	0	1	2	3	4	5	6	7	8	9	0	1	2	3	4	5	6	7	8	9	0
bog175	T	T	C	T	A	T	A	A	A	T	A	T	T	A	C	A	A	T	G	G	C	C	T	C	A	G	T	T	T	C	A	T	A	T	A	A	G	A	T	T	A	A	A	T	A	T	T	A	A
pse139	T	T	C	T	A	T	A	A	A	T	A	T	T	A	C	A	A	T	G	G	C	C	T	C	A	G	T	T	T	C	A	T	A	T	A	A	G	A	T	T	A	A	A	T	A	T	T	A	A
pse FB	T	T	C	G	T	T	A	A	A	T	A	T	T	A	C	A	C	T	G	G	C	C	T	C	A	G	T	T	T	C	A	T	A	T	A	A	G	A	T	T	A	A	A	T	A	T	T	A	A
	110	111	112	113	114	115	116	117	118	119	120	121	122	123	124	125	126	127	128	129	130	131	132	133	134	135	136	137	138	139	140	141	142	143	144	145	146	147	148	149	150	151	152	153	154	155	156	157	158
1	1	1	1	1	1	1	1	1	1	1	1	1	1	1	1	1	1	1	1	1	1	1	1	1	1	1	1	1	1	1	1	1	1	1	1	1	1	1	1	1	1	1	1	1	1	1	1	1	1
2	2	2	2	2	2	2	2	2	2	2	2	2	2	2	2	2	2	2	3	3	3	3	3	3	3	3	3	3	3	3	3	3	3	3	3	3	3	3	3	3	3	3	3	3	3	3	3	3	3
8	8	8	8	8	8	8	8	8	9	9	9	9	9	9	9	9	9	9	0	0	0	0	0	0	0	0	0	0	1	1	1	1	1	1	1	1	1	1	2	2	2	2	2	2	2	2	2	2	3
1	2	3	4	5	6	7	8	9	0	1	2	3	4	5	6	7	8	9	0	1	2	3	4	5	6	7	8	9	0	1	2	3	4	5	6	7	8	9	0	1	2	3	4	5	6	7	8	9	0
bog175	T	A	T	A	C	C	G	C	A	C	C	A	C	T	T	T	A	G	A	T	A	A	A	G	T	A	T	A	T	T	A	T	G	G	C	A	T	A	G	C	T	C	T	A	A	G	T	T	C
pse139	T	A	T	A	C	C	G	C	A	C	C	A	C	T	T	T	A	G	A	T	A	A	A	G	T	A	T	A	T	T	A	T	G	G	C	A	T	A	G	C	T	C	T	A	A	G	T	T	C
pse FB	T	A	T	A	C	C	G	C	A	C	C	A	C	T	T	T	A	G	A	T	A	A	A	G	T	A	T	A	T	T	A	T	G	G	C	A	T	A	G	C	T	T	T	A	A	A	T	T	C
	190	191	192	193	194	195	196	197	198	199	200	201	202	203	204	205	206	207	208	209	210	211	212	213	214	215	216	217	218	219	220	221	222	223	224	225	226	227	228	229	230	231	232	233	234	235	236	237	238
1	1	1	1	1	1	1	1	1	1	1	1	1	1	1	1	1	1	1	1	1	1	1	1	1	1	1	1	1	1	1	1	1	1	1	1	1	1	1	1	1	1	1	1	1	1	1	1	1	1
3	3	3	3	3	3	3	3	3	3	3	3	3	3	3	3	3	3	3	3	3	3	3	3	3	3	3	3	3	3	3	3	3	3	3	3	3	3	3	4	4	4	4	4	4	4	4	4	4	4
6	6	6	6	6	6	6	6	6	7	7	7	7	7	7	7	7	7	7	8	8	8	8	8	8	8	8	8	8	9	9	9	9	9	9	9	9	9	9	0	0	0	0	0	0	0	0	0	0	1
1	2	3	4	5	6	7	8	9	0	1	2	3	4	5	6	7	8	9	0	1	2	3	4	5	6	7	8	9	0	1	2	3	4	5	6	7	8	9	0	1	2	3	4	5	6	7	8	9	0
bog175	T	C	A	T	A	T	A	A	A	A	C	T	G	G	T	A	A	A	A	A	A	A	A	C	T	C	T	G	A	A	T	T	T	T	A	A	C	T	A	T	C	A	T	T	T	G	A	A	C
pse139	T	C	A	T	A	T	A	A	A	A	C	T	G	G	T	A	A	A	A	A	A	A	A	C	T	C	T	G	A	A	T	T	T	T	A	A	C	T	A	T	C	A	T	T	T	G	A	A	C
pse FB	T	C	A	T	A	T	A	A	A	A	C	T	G	G	T	A	A	A	A	A	A	A	A	C	T	C	T	G	A	A	T	T	T	C	A	A	C	T	A	T	C	A	T	T	T	G	A	A	C
	270	271	272	273	274	275	276	277	278	279	280	281	282	283	284	285	286	287	288	289	290	291	292	293	294	295	296	297	298	299	300	301	302	303	304	305	306	307	308	309	310	311	312	313	314	315	316	317	318
1	1	1	1	1	1	1	1	1	1	1	1	1	1	1	1	1	1	1	1	1	1	1	1	1	1	1	1	1	1	1	1	1	1	1	1	1	1	1	1	1	1	1	1	1	1	1	1	1	1
4	4	4	4	4	4	4	4	4	4	4	4	4	4	4	4	4	4	4	4	4	4	4	4	4	4	4	4	4	4	4	4	4	4	4	4	4	4	4	4	4	4	4	4	4	4	4	4	4	4
4	4	4	4	4	4	4	4	4	5	5	5	5	5	5	5	5	5	5	6	6	6	6	6	6	6	6	6	6	7	7	7	7	7	7	7	7	7	7	8	8	8	8	8	8	8	8	8	8	9
1	2	3	4	5	6	7	8	9	0	1	2	3	4	5	6	7	8	9	0	1	2	3	4	5	6	7	8	9	0	1	2	3	4	5	6	7	8	9	0	1	2	3	4	5	6	7	8	9	0
bog175	G	G	C	C	A	T	T	A	A	A	T	C	A	T	A	T	C	A	T	A	A	T	C	G	C	A	T	T	T	C	G	G	T	T	T	G	G	A	T	A	T	A	T	A	A	G	C	A	C
pse139	G	G	C	C	A	T	T	A	A	A	T	C	A	T	A	T	C	A	T	A	A	T	C	G	C	A	T	T	T	C	G	G	T	T	T	G	G	A	T	A	T	A	T	A	A	G	C	A	C
pse FB	G	G	C	C	A	T	T	A	A	A	T	C	A	T	A	T	C	A	T	A	A	T	C	A	C	A	T	T	T	C	T	G	T	T	T	G	G	A	T	A	T	A	T	A	A	G	C	A	C
	350	351	352	353	354	355	356	357	358	359	360	361	362	363	364	365	366	367	368	369	370	371	372	373	374	375	376	377	378	379	380	381	382	383	384	385	386	387	388	389	390	391	392	393	394	395	396	397	398
																								Intron
1	1	1	1	1	1	1	1	1	1	1	1	1	1	1	1	1	1	1	1	1	1	1	1	1	1	1	1	1	1	1	1	1	1	1	1	1	1	1	1	1	1	1	1	1	1	1	1	1	1
5	5	5	5	5	5	5	5	5	5	5	5	5	5	5	5	5	5	5	5	5	5	5	5	5	5	5	5	5	5	5	5	5	5	5	5	5	5	5	5	5	5	5	5	5	5	5	5	5	5
2	2	2	2	2	2	2	2	2	3	3	3	3	3	3	3	3	3	3	4	4	4	4	4	4	4	4	4	4	5	5	5	5	5	5	5	5	5	5	6	6	6	6	6	6	6	6	6	6	7
1	2	3	4	5	6	7	8	9	0	1	2	3	4	5	6	7	8	9	0	1	2	3	4	5	6	7	8	9	0	1	2	3	4	5	6	7	8	9	0	1	2	3	4	5	6	7	8	9	0
bog175	T	C	G	A	G	G	A	G	T	T	G	A	G	C	T	G	G	T	G	C	C	A	C	C	G	A	A	A	A	T	G	A	A	A	A	T	G	G	G	T	G	A	C	A	C	G	G	A	A
pse139	T	C	G	A	G	G	A	G	T	T	G	A	G	C	T	G	G	A	G	C	C	A	C	C	G	A	A	A	A	T	G	A	A	A	A	T	G	G	G	T	G	A	C	A	C	G	G	A	A
pse FB	T	C	G	A	G	G	A	G	T	T	G	A	G	C	T	G	G	A	G	C	C	A	C	C	G	A	A	A	A	T	G	A	A	A	A	T	G	G	G	T	G	A	C	A	C	G	G	A	A
	430	431	432	433	434	435	436	437	438	439	440	441	442	443	444	445	446	447	448	449	450	451	452	453	454	455	456	457	458	459	460	461	462	463	464	465	466	467	468	469	470	471	472	473	474	475	476	477	478
	Positions
SRX	-877	-840	-811	-622
204750	p	p	p
204753			p
204757	p	p	p
204763				p
204764	p	p	b
204780	b	b	gap	b
204787				b
204790				b
[truncated: 31 more columns]

## Sheet: GA25574
GA25574 (-1,211>+362)
									1	1	1	1	1	1	1	1	1	1	2	2	2	2	2	2	2	2	2	2	3	3	3	3	3	3	3	3	3	3	4	4	4	4	4	4	4	4	4	4	5
1	2	3	4	5	6	7	8	9	0	1	2	3	4	5	6	7	8	9	0	1	2	3	4	5	6	7	8	9	0	1	2	3	4	5	6	7	8	9	0	1	2	3	4	5	6	7	8	9	0
bog175	G	T	A	A	T	A	T	A	G	T	G	T	T	T	T	G	A	A	T	T	C	T	T	G	A	C	A	A	T	A	G	A	T	G	T	A	A	T	A	G	C	C	A	G	A	A	A	G	A
pse139	G	T	A	A	T	A	T	A	G	T	G	T	T	T	T	G	A	A	T	T	C	T	T	G	A	C	A	A	T	A	G	A	T	G	T	A	A	T	A	G	C	C	A	G	A	A	A	G	A
DpseFB	G	T	A	A	T	A	T	A	G	T	G	T	T	T	T	G	A	A	T	T	C	T	T	G	A	C	A	A	T	A	G	A	T	G	T	A	A	T	A	G	C	C	A	G	A	A	A	G	A
	-1211	-1210	-1209	-1208	-1207	-1206	-1205	-1204	-1203	-1202	-1201	-1200	-1199	-1198	-1197	-1196	-1195	-1194	-1193	-1192	-1191	-1190	-1189	-1188	-1187	-1186	-1185	-1184	-1183	-1182	-1181	-1180	-1179	-1178	-1177	-1176	-1175	-1174	-1173	-1172	-1171	-1170	-1169	-1168	-1167	-1166	-1165	-1164	-1163
																			1	1	1	1	1	1	1	1	1	1	1	1	1	1	1	1	1	1	1	1	1	1	1	1	1	1	1	1	1	1	1
8	8	8	8	8	8	8	8	8	9	9	9	9	9	9	9	9	9	9	0	0	0	0	0	0	0	0	0	0	1	1	1	1	1	1	1	1	1	1	2	2	2	2	2	2	2	2	2	2	3
1	2	3	4	5	6	7	8	9	0	1	2	3	4	5	6	7	8	9	0	1	2	3	4	5	6	7	8	9	0	1	2	3	4	5	6	7	8	9	0	1	2	3	4	5	6	7	8	9	0
bog175	C	T	A	A	T	C	G	A	A	A	T	A	T	T	C	T	C	C	G	A	T	T	T	G	A	A	G	A	A	C	G	C	C	T	A	A	A	T	A	T	G	T	A	T	G	T	A	A	A
pse139	C	T	A	A	T	C	G	A	A	A	T	A	T	T	C	T	C	C	G	A	T	T	T	G	A	A	G	A	A	C	G	C	C	T	A	A	A	T	A	T	G	T	A	T	G	T	A	A	A
DpseFB	C	T	A	A	T	C	G	A	A	A	T	A	T	T	C	T	C	C	G	A	T	T	T	G	A	A	G	A	A	C	G	C	C	T	A	A	A	T	A	T	G	T	A	T	G	T	A	A	A
	-1131	-1130	-1129	-1128	-1127	-1126	-1125	-1124	-1123	-1122	-1121	-1120	-1119	-1118	-1117	-1116	-1115	-1114	-1113	-1112	-1111	-1110	-1109	-1108	-1107	-1106	-1105	-1104	-1103	-1102	-1101	-1100	-1099	-1098	-1097	-1096	-1095	-1094	-1093	-1092	-1091	-1090	-1089	-1088	-1087	-1086	-1085	-1084	-1083
1	1	1	1	1	1	1	1	1	1	1	1	1	1	1	1	1	1	1	1	1	1	1	1	1	1	1	1	1	1	1	1	1	1	1	1	1	1	1	2	2	2	2	2	2	2	2	2	2	2
6	6	6	6	6	6	6	6	6	7	7	7	7	7	7	7	7	7	7	8	8	8	8	8	8	8	8	8	8	9	9	9	9	9	9	9	9	9	9	0	0	0	0	0	0	0	0	0	0	1
1	2	3	4	5	6	7	8	9	0	1	2	3	4	5	6	7	8	9	0	1	2	3	4	5	6	7	8	9	0	1	2	3	4	5	6	7	8	9	0	1	2	3	4	5	6	7	8	9	0
bog175	A	A	A	A	T	T	A	A	A	T	A	G	A	C	G	G	A	G	T	T	T	T	G	A	C	G	T	A	A	A	C	T	A	T	T	C	A	A	G	G	A	A	T	A	A	C	T	T	T
pse139	A	A	A	A	T	T	A	A	A	T	A	G	A	C	G	G	A	G	T	T	T	T	G	A	C	G	T	A	A	A	C	T	A	T	T	C	A	A	G	G	A	A	T	A	A	C	T	T	T
DpseFB	A	A	A	A	T	T	A	A	A	T	A	G	A	C	G	G	A	G	T	T	T	T	G	A	C	T	T	A	A	A	C	T	A	T	T	C	A	A	G	G	A	A	T	A	A	C	T	T	T
	-1051	-1050	-1049	-1048	-1047	-1046	-1045	-1044	-1043	-1042	-1041	-1040	-1039	-1038	-1037	-1036	-1035	-1034	-1033	-1032	-1031	-1030	-1029	-1028	-1027	-1026	-1025	-1024	-1023	-1022	-1021	-1020	-1019	-1018	-1017	-1016	-1015	-1014	-1013	-1012	-1011	-1010	-1009	-1008	-1007	-1006	-1005	-1004	-1003
2	2	2	2	2	2	2	2	2	2	2	2	2	2	2	2	2	2	2	2	2	2	2	2	2	2	2	2	2	2	2	2	2	2	2	2	2	2	2	2	2	2	2	2	2	2	2	2	2	2
4	4	4	4	4	4	4	4	4	5	5	5	5	5	5	5	5	5	5	6	6	6	6	6	6	6	6	6	6	7	7	7	7	7	7	7	7	7	7	8	8	8	8	8	8	8	8	8	8	9
1	2	3	4	5	6	7	8	9	0	1	2	3	4	5	6	7	8	9	0	1	2	3	4	5	6	7	8	9	0	1	2	3	4	5	6	7	8	9	0	1	2	3	4	5	6	7	8	9	0
bog175	C	G	G	A	C	T	T	A	A	T	G	C	T	G	A	C	C	A	G	C	T	C	G	A	T	A	A	A	G	T	G	A	T	T	T	C	T	A	T	A	C	C	C	G	A	T	A	C	C
pse139	C	G	G	A	C	T	T	A	A	T	G	C	T	G	A	C	C	A	G	C	T	C	G	A	T	A	A	A	G	T	G	A	T	T	T	C	T	A	T	A	C	C	C	G	A	T	A	C	C
DpseFB	A	G	G	A	C	T	T	A	A	T	G	C	T	G	A	C	C	A	G	C	T	C	G	A	T	A	A	A	G	T	G	A	T	T	T	C	T	A	T	A	C	C	C	G	A	T	A	C	C
	-971	-970	-969	-968	-967	-966	-965	-964	-963	-962	-961	-960	-959	-958	-957	-956	-955	-954	-953	-952	-951	-950	-949	-948	-947	-946	-945	-944	-943	-942	-941	-940	-939	-938	-937	-936	-935	-934	-933	-932	-931	-930	-929	-928	-927	-926	-925	-924	-923
3	3	3	3	3	3	3	3	3	3	3	3	3	3	3	3	3	3	3	3	3	3	3	3	3	3	3	3	3	3	3	3	3	3	3	3	3	3	3	3	3	3	3	3	3	3	3	3	3	3
2	2	2	2	2	2	2	2	2	3	3	3	3	3	3	3	3	3	3	4	4	4	4	4	4	4	4	4	4	5	5	5	5	5	5	5	5	5	5	6	6	6	6	6	6	6	6	6	6	7
1	2	3	4	5	6	7	8	9	0	1	2	3	4	5	6	7	8	9	0	1	2	3	4	5	6	7	8	9	0	1	2	3	4	5	6	7	8	9	0	1	2	3	4	5	6	7	8	9	0
bog175	G	G	C	G	A	A	A	A	T	G	G	A	T	G	T	G	T	G	T	A	A	A	G	C	C	C	A	G	A	A	G	A	A	A	G	G	A	A	G	C	G	T	T	T	C	C	G	A	C
pse139	G	G	C	G	A	A	A	A	T	G	G	A	T	G	T	G	T	G	T	A	A	A	G	C	C	C	A	G	A	A	G	A	A	A	G	G	A	A	G	C	G	T	T	T	C	C	G	A	C
DpseFB	G	G	C	G	A	A	A	A	T	G	G	A	T	G	T	G	T	G	T	A	A	A	G	C	C	C	A	G	-	-	-	-	A	A	G	G	A	A	G	C	G	T	T	T	C	C	G	C	T
	-891	-890	-889	-888	-887	-886	-885	-884	-883	-882	-881	-880	-879	-878	-877	-876	-875	-874	-873	-872	-871	-870	-869	-868	-867	-866	-865	-864	-863	-862	-861	-860	-859	-858	-857	-856	-855	-854	-853	-852	-851	-850	-849	-848	-847	-846	-845	-844	-843
4	4	4	4	4	4	4	4	4	4	4	4	4	4	4	4	4	4	4	4	4	4	4	4	4	4	4	4	4	4	4	4	4	4	4	4	4	4	4	4	4	4	4	4	4	4	4	4	4	4
0	0	0	0	0	0	0	0	0	1	1	1	1	1	1	1	1	1	1	2	2	2	2	2	2	2	2	2	2	3	3	3	3	3	3	3	3	3	3	4	4	4	4	4	4	4	4	4	4	5
1	2	3	4	5	6	7	8	9	0	1	2	3	4	5	6	7	8	9	0	1	2	3	4	5	6	7	8	9	0	1	2	3	4	5	6	7	8	9	0	1	2	3	4	5	6	7	8	9	0
bog175	T	A	T	T	C	T	T	G	A	T	C	A	G	C	A	T	C	A	A	T	A	G	C	C	G	A	G	T	C	G	A	T	A	G	A	G	C	A	T	T	G	C	C	T	G	T	C	T	G
pse139	T	A	T	T	C	T	T	G	A	T	C	A	G	C	A	T	C	A	A	T	A	G	C	C	G	A	G	T	C	G	A	T	A	G	A	G	C	A	T	T	G	C	C	T	G	T	C	T	G
DpseFB	T	T	T	T	C	T	T	G	A	T	C	A	G	C	A	T	C	A	A	T	A	G	C	C	G	A	G	T	C	G	A	T	A	G	A	G	C	A	T	T	G	C	C	T	G	T	C	T	G
	-811	-810	-809	-808	-807	-806	-805	-804	-803	-802	-801	-800	-799	-798	-797	-796	-795	-794	-793	-792	-791	-790	-789	-788	-787	-786	-785	-784	-783	-782	-781	-780	-779	-778	-777	-776	-775	-774	-773	-772	-771	-770	-769	-768	-767	-766	-765	-764	-763
4	4	4	4	4	4	4	4	4	4	4	4	4	4	4	4	4	4	4	5	5	5	5	5	5	5	5	5	5	5	5	5	5	5	5	5	5	5	5	5	5	5	5	5	5	5	5	5	5	5
8	8	8	8	8	8	8	8	8	9	9	9	9	9	9	9	9	9	9	0	0	0	0	0	0	0	0	0	0	1	1	1	1	1	1	1	1	1	1	2	2	2	2	2	2	2	2	2	2	3
1	2	3	4	5	6	7	8	9	0	1	2	3	4	5	6	7	8	9	0	1	2	3	4	5	6	7	8	9	0	1	2	3	4	5	6	7	8	9	0	1	2	3	4	5	6	7	8	9	0
bog175	T	C	A	G	A	G	A	C	C	T	T	A	A	C	A	G	C	T	A	G	A	G	C	A	A	C	G	A	A	A	T	T	T	T	G	T	T	T	G	C	A	G	A	C	T	C	C	T	G
pse139	T	C	A	G	A	G	A	C	C	T	T	A	A	C	A	G	C	T	A	G	A	G	C	A	A	C	G	A	A	A	T	T	T	T	G	T	T	T	G	C	A	G	A	C	T	C	C	T	G
DpseFB	T	C	A	G	A	G	A	C	C	T	T	A	A	G	A	G	C	T	A	G	A	G	C	A	A	C	G	A	A	A	T	T	T	T	G	T	T	T	G	C	A	G	A	C	T	C	C	T	G
	-731	-730	-729	-728	-727	-726	-725	-724	-723	-722	-721	-720	-719	-718	-717	-716	-715	-714	-713	-712	-711	-710	-709	-708	-707	-706	-705	-704	-703	-702	-701	-700	-699	-698	-697	-696	-695	-694	-693	-692	-691	-690	-689	-688	-687	-686	-685	-684	-683
5	5	5	5	5	5	5	5	5	5	5	5	5	5	5	5	5	5	5	5	5	5	5	5	5	5	5	5	5	5	5	5	5	5	5	5	5	5	5	6	6	6	6	6	6	6	6	6	6	6
6	6	6	6	6	6	6	6	6	7	7	7	7	7	7	7	7	7	7	8	8	8	8	8	8	8	8	8	8	9	9	9	9	9	9	9	9	9	9	0	0	0	0	0	0	0	0	0	0	1
1	2	3	4	5	6	7	8	9	0	1	2	3	4	5	6	7	8	9	0	1	2	3	4	5	6	7	8	9	0	1	2	3	4	5	6	7	8	9	0	1	2	3	4	5	6	7	8	9	0
bog175	A	T	T	T	T	G	C	C	A	C	G	C	T	C	C	T	T	T	C	C	G	C	C	C	C	A	C	A	A	A	A	G	C	G	A	A	A	A	T	C	T	G	T	G	G	C	A	T	C
pse139	A	T	T	T	T	G	C	C	A	C	G	C	T	C	C	T	T	T	C	C	G	C	C	C	C	A	C	A	A	A	A	G	C	G	A	A	A	A	T	C	T	G	T	G	G	C	A	T	C
DpseFB	A	T	T	T	T	G	C	C	A	C	G	C	T	C	C	T	T	T	C	C	G	C	C	C	C	A	C	A	A	A	A	G	C	G	A	A	A	A	T	C	T	G	T	G	G	C	A	T	C
	-651	-650	-649	-648	-647	-646	-645	-644	-643	-642	-641	-640	-639	-638	-637	-636	-635	-634	-633	-632	-631	-630	-629	-628	-627	-626	-625	-624	-623	-622	-621	-620	-619	-618	-617	-616	-615	-614	-613	-612	-611	-610	-609	-608	-607	-606	-605	-604	-603
6	6	6	6	6	6	6	6	6	6	6	6	6	6	6	6	6	6	6	6	6	6	6	6	6	6	6	6	6	6	6	6	6	6	6	6	6	6	6	6	6	6	6	6	6	6	6	6	6	6
4	4	4	4	4	4	4	4	4	5	5	5	5	5	5	5	5	5	5	6	6	6	6	6	6	6	6	6	6	7	7	7	7	7	7	7	7	7	7	8	8	8	8	8	8	8	8	8	8	9
1	2	3	4	5	6	7	8	9	0	1	2	3	4	5	6	7	8	9	0	1	2	3	4	5	6	7	8	9	0	1	2	3	4	5	6	7	8	9	0	1	2	3	4	5	6	7	8	9	0
bog175	A	T	G	G	C	T	A	T	A	T	C	T	T	T	T	A	C	C	G	A	A	T	C	T	G	G	G	T	C	A	G	T	T	C	G	G	A	T	T	A	T	T	A	C	A	G	C	A	A
pse139	A	T	G	G	C	T	A	T	A	T	C	T	T	T	T	A	C	C	G	A	A	T	C	T	G	G	G	T	C	A	G	T	T	C	G	G	A	T	T	A	T	T	A	C	A	G	C	A	A
DpseFB	A	T	G	G	C	T	A	T	A	T	C	T	T	T	T	A	C	C	G	A	A	T	C	T	G	G	G	T	C	A	G	T	T	C	G	G	A	T	T	A	T	T	A	C	A	G	C	A	A
	-571	-570	-569	-568	-567	-566	-565	-564	-563	-562	-561	-560	-559	-558	-557	-556	-555	-554	-553	-552	-551	-550	-549	-548	-547	-546	-545	-544	-543	-542	-541	-540	-539	-538	-537	-536	-535	-534	-533	-532	-531	-530	-529	-528	-527	-526	-525	-524	-523
7	7	7	7	7	7	7	7	7	7	7	7	7	7	7	7	7	7	7	7	7	7	7	7	7	7	7	7	7	7	7	7	7	7	7	7	7	7	7	7	7	7	7	7	7	7	7	7	7	7
2	2	2	2	2	2	2	2	2	3	3	3	3	3	3	3	3	3	3	4	4	4	4	4	4	4	4	4	4	5	5	5	5	5	5	5	5	5	5	6	6	6	6	6	6	6	6	6	6	7
1	2	3	4	5	6	7	8	9	0	1	2	3	4	5	6	7	8	9	0	1	2	3	4	5	6	7	8	9	0	1	2	3	4	5	6	7	8	9	0	1	2	3	4	5	6	7	8	9	0
bog175	C	T	A	T	T	C	A	A	G	A	T	T	T	C	G	A	C	T	T	G	C	A	T	T	C	G	A	A	A	G	T	A	C	A	C	T	G	T	G	A	A	C	G	A	A	A	T	G	G
pse139	C	T	A	T	T	C	A	A	G	A	T	T	T	C	G	A	C	T	T	G	C	A	T	T	C	G	A	A	A	G	T	A	C	A	C	T	G	T	G	A	A	C	G	A	A	A	T	G	G
DpseFB	C	T	A	T	T	C	A	A	G	A	T	T	T	C	G	A	C	T	T	G	C	A	T	T	C	G	A	A	A	G	T	A	C	A	C	T	G	T	G	A	A	C	G	A	A	A	T	A	G
	-491	-490	-489	-488	-487	-486	-485	-484	-483	-482	-481	-480	-479	-478	-477	-476	-475	-474	-473	-472	-471	-470	-469	-468	-467	-466	-465	-464	-463	-462	-461	-460	-459	-458	-457	-456	-455	-454	-453	-452	-451	-450	-449	-448	-447	-446	-445	-444	-443
8	8	8	8	8	8	8	8	8	8	8	8	8	8	8	8	8	8	8	8	8	8	8	8	8	8	8	8	8	8	8	8	8	8	8	8	8	8	8	8	8	8	8	8	8	8	8	8	8	8
0	0	0	0	0	0	0	0	0	1	1	1	1	1	1	1	1	1	1	2	2	2	2	2	2	2	2	2	2	3	3	3	3	3	3	3	3	3	3	4	4	4	4	4	4	4	4	4	4	5
1	2	3	4	5	6	7	8	9	0	1	2	3	4	5	6	7	8	9	0	1	2	3	4	5	6	7	8	9	0	1	2	3	4	5	6	7	8	9	0	1	2	3	4	5	6	7	8	9	0
bog175	A	T	C	A	G	T	T	G	G	A	A	A	C	C	A	A	A	T	T	A	C	T	A	A	T	A	A	T	C	T	G	T	T	T	A	A	A	T	C	A	G	T	T	T	T	G	A	A	A
pse139	A	T	C	A	G	T	T	G	G	A	A	A	C	C	A	A	A	T	T	A	C	T	A	A	T	A	A	T	C	T	G	T	T	T	A	A	A	T	C	A	G	T	T	T	T	G	A	A	A
DpseFB	A	T	T	A	G	T	T	G	G	A	A	A	C	C	A	A	A	T	T	A	C	T	A	A	T	A	A	T	C	T	G	T	T	T	A	A	A	T	C	A	G	T	T	T	T	G	A	A	A
	-411	-410	-409	-408	-407	-406	-405	-404	-403	-402	-401	-400	-399	-398	-397	-396	-395	-394	-393	-392	-391	-390	-389	-388	-387	-386	-385	-384	-383	-382	-381	-380	-379	-378	-377	-376	-375	-374	-373	-372	-371	-370	-369	-368	-367	-366	-365	-364	-363
8	8	8	8	8	8	8	8	8	8	8	8	8	8	8	8	8	8	8	9	9	9	9	9	9	9	9	9	9	9	9	9	9	9	9	9	9	9	9	9	9	9	9	9	9	9	9	9	9	9
8	8	8	8	8	8	8	8	8	9	9	9	9	9	9	9	9	9	9	0	0	0	0	0	0	0	0	0	0	1	1	1	1	1	1	1	1	1	1	2	2	2	2	2	2	2	2	2	2	3
1	2	3	4	5	6	7	8	9	0	1	2	3	4	5	6	7	8	9	0	1	2	3	4	5	6	7	8	9	0	1	2	3	4	5	6	7	8	9	0	1	2	3	4	5	6	7	8	9	0
bog175	G	G	A	A	G	G	A	A	A	T	G	C	A	A	A	A	C	T	A	G	A	G	G	T	C	C	T	T	T	T	G	A	A	A	A	C	A	T	A	T	G	T	A	T	A	T	G	C	T
pse139	G	G	A	A	G	G	A	A	A	T	G	C	A	A	A	A	C	T	A	G	A	G	G	T	C	C	T	T	T	T	G	A	A	A	A	C	A	T	A	T	G	T	A	T	A	T	G	C	T
DpseFB	G	G	A	A	G	G	A	A	A	T	G	C	A	A	A	A	C	T	A	G	A	G	T	T	C	C	T	T	T	T	G	A	A	A	A	T	A	T	A	T	G	T	A	T	A	T	G	C	T
	-331	-330	-329	-328	-327	-326	-325	-324	-323	-322	-321	-320	-319	-318	-317	-316	-315	-314	-313	-312	-311	-310	-309	-308	-307	-306	-305	-304	-303	-302	-301	-300	-299	-298	-297	-296	-295	-294	-293	-292	-291	-290	-289	-288	-287	-286	-285	-284	-283
																																							1	1	1	1	1	1	1	1	1	1	1
9	9	9	9	9	9	9	9	9	9	9	9	9	9	9	9	9	9	9	9	9	9	9	9	9	9	9	9	9	9	9	9	9	9	9	9	9	9	9	0	0	0	0	0	0	0	0	0	0	0
6	6	6	6	6	6	6	6	6	7	7	7	7	7	7	7	7	7	7	8	8	8	8	8	8	8	8	8	8	9	9	9	9	9	9	9	9	9	9	0	0	0	0	0	0	0	0	0	0	1
1	2	3	4	5	6	7	8	9	0	1	2	3	4	5	6	7	8	9	0	1	2	3	4	5	6	7	8	9	0	1	2	3	4	5	6	7	8	9	0	1	2	3	4	5	6	7	8	9	0
bog175	G	C	T	G	T	G	G	G	T	A	C	A	T	G	G	G	T	C	A	G	T	C	T	G	A	C	T	G	G	C	A	A	A	T	C	G	C	T	G	G	C	A	T	G	A	T	A	C	A
pse139	G	C	T	G	T	G	G	G	T	A	C	A	T	G	G	G	T	C	A	G	T	C	T	G	A	C	T	G	G	C	A	A	A	T	C	G	C	T	G	G	C	A	T	G	A	T	A	C	A
DpseFB	G	C	T	G	T	G	G	G	T	A	C	A	T	G	G	G	T	C	A	G	T	C	T	G	A	C	T	G	G	C	A	A	A	T	C	G	C	T	G	G	C	A	T	G	A	T	A	C	A
	-251	-250	-249	-248	-247	-246	-245	-244	-243	-242	-241	-240	-239	-238	-237	-236	-235	-234	-233	-232	-231	-230	-229	-228	-227	-226	-225	-224	-223	-222	-221	-220	-219	-218	-217	-216	-215	-214	-213	-212	-211	-210	-209	-208	-207	-206	-205	-204	-203
1	1	1	1	1	1	1	1	1	1	1	1	1	1	1	1	1	1	1	1	1	1	1	1	1	1	1	1	1	1	1	1	1	1	1	1	1	1	1	1	1	1	1	1	1	1	1	1	1	1
0	0	0	0	0	0	0	0	0	0	0	0	0	0	0	0	0	0	0	0	0	0	0	0	0	0	0	0	0	0	0	0	0	0	0	0	0	0	0	0	0	0	0	0	0	0	0	0	0	0
4	4	4	4	4	4	4	4	4	5	5	5	5	5	5	5	5	5	5	6	6	6	6	6	6	6	6	6	6	7	7	7	7	7	7	7	7	7	7	8	8	8	8	8	8	8	8	8	8	9
1	2	3	4	5	6	7	8	9	0	1	2	3	4	5	6	7	8	9	0	1	2	3	4	5	6	7	8	9	0	1	2	3	4	5	6	7	8	9	0	1	2	3	4	5	6	7	8	9	0
bog175	G	C	C	A	C	G	T	T	T	A	G	C	C	A	C	T	G	C	T	T	A	A	T	C	A	C	T	T	T	A	A	C	A	C	A	T	C	A	A	A	C	T	T	T	T	G	G	C	G
pse139	G	C	C	A	C	G	T	T	T	A	G	C	C	A	C	T	G	C	T	T	A	A	T	C	A	C	T	T	T	A	A	C	A	C	A	T	C	A	A	A	C	T	T	T	T	G	G	C	G
DpseFB	G	C	C	A	C	G	T	T	T	A	G	C	C	A	C	T	G	C	T	T	A	A	T	C	A	C	T	T	T	A	A	C	A	C	A	T	C	A	A	A	C	T	T	T	T	G	G	C	G
	-171	-170	-169	-168	-167	-166	-165	-164	-163	-162	-161	-160	-159	-158	-157	-156	-155	-154	-153	-152	-151	-150	-149	-148	-147	-146	-145	-144	-143	-142	-141	-140	-139	-138	-137	-136	-135	-134	-133	-132	-131	-130	-129	-128	-127	-126	-125	-124	-123
1	1	1	1	1	1	1	1	1	1	1	1	1	1	1	1	1	1	1	1	1	1	1	1	1	1	1	1	1	1	1	1	1	1	1	1	1	1	1	1	1	1	1	1	1	1	1	1	1	1
1	1	1	1	1	1	1	1	1	1	1	1	1	1	1	1	1	1	1	1	1	1	1	1	1	1	1	1	1	1	1	1	1	1	1	1	1	1	1	1	1	1	1	1	1	1	1	1	1	1
2	2	2	2	2	2	2	2	2	3	3	3	3	3	3	3	3	3	3	4	4	4	4	4	4	4	4	4	4	5	5	5	5	5	5	5	5	5	5	6	6	6	6	6	6	6	6	6	6	7
1	2	3	4	5	6	7	8	9	0	1	2	3	4	5	6	7	8	9	0	1	2	3	4	5	6	7	8	9	0	1	2	3	4	5	6	7	8	9	0	1	2	3	4	5	6	7	8	9	0
bog175	A	G	T	C	A	T	G	T	A	A	A	T	G	A	G	A	A	T	T	T	T	C	A	T	G	A	C	A	A	A	T	T	A	G	T	G	G	A	G	A	C	G	G	C	T	T	T	T	A
pse139	A	G	T	C	A	T	G	T	A	A	A	T	G	A	G	A	A	T	T	T	T	C	A	T	G	A	C	A	A	A	T	T	A	G	T	G	G	A	G	A	C	G	G	C	T	T	T	T	A
DpseFB	A	G	T	C	A	T	G	T	A	A	A	T	G	A	G	A	A	T	T	T	T	C	A	T	G	A	C	A	A	A	T	T	A	G	T	G	G	A	G	A	C	G	G	C	T	T	T	T	A
	-91	-90	-89	-88	-87	-86	-85	-84	-83	-82	-81	-80	-79	-78	-77	-76	-75	-74	-73	-72	-71	-70	-69	-68	-67	-66	-65	-64	-63	-62	-61	-60	-59	-58	-57	-56	-55	-54	-53	-52	-51	-50	-49	-48	-47	-46	-45	-44	-43
1	1	1	1	1	1	1	1	1	1	1	1	1	1	1	1	1	1	1	1	1	1	1	1	1	1	1	1	1	1	1	1	1	1	1	1	1	1	1	1	1	1	1	1	1	1	1	1	1	1
2	2	2	2	2	2	2	2	2	2	2	2	2	2	2	2	2	2	2	2	2	2	2	2	2	2	2	2	2	2	2	2	2	2	2	2	2	2	2	2	2	2	2	2	2	2	2	2	2	2
0	0	0	0	0	0	0	0	0	1	1	1	1	1	1	1	1	1	1	2	2	2	2	2	2	2	2	2	2	3	3	3	3	3	3	3	3	3	3	4	4	4	4	4	4	4	4	4	4	5
1	2	3	4	5	6	7	8	9	0	1	2	3	4	5	6	7	8	9	0	1	2	3	4	5	6	7	8	9	0	1	2	3	4	5	6	7	8	9	0	1	2	3	4	5	6	7	8	9	0
bog175	G	C	C	T	A	G	T	C	T	G	G	A	G	T	C	G	G	T	C	A	G	T	A	G	C	T	T	T	C	A	G	T	G	G	A	T	T	C	C	A	A	C	G	A	G	A	C	A	T
pse139	G	C	C	T	A	G	T	C	T	G	G	A	G	T	C	G	G	T	C	A	G	T	A	G	C	T	T	T	C	A	G	T	G	G	A	T	T	C	C	A	A	C	G	A	G	A	C	A	T
DpseFB	G	C	C	T	A	G	T	C	T	G	G	A	G	T	C	G	G	T	C	A	G	T	A	G	C	T	T	T	C	A	G	T	G	G	A	T	T	C	C	A	A	C	G	A	G	A	C	A	T
	-11	-10	-9	-8	-7	-6	-5	-4	-3	-2	-1	1	2	3	4	5	6	7	8	9	10	11	12	13	14	15	16	17	18	19	20	21	22	23	24	25	26	27	28	29	30	31	32	33	34	35	36	37	38
1	1	1	1	1	1	1	1	1	1	1	1	1	1	1	1	1	1	1	1	1	1	1	1	1	1	1	1	1	1	1	1	1	1	1	1	1	1	1	1	1	1	1	1	1	1	1	1	1	1
2	2	2	2	2	2	2	2	2	2	2	2	2	2	2	2	2	2	2	3	3	3	3	3	3	3	3	3	3	3	3	3	3	3	3	3	3	3	3	3	3	3	3	3	3	3	3	3	3	3
8	8	8	8	8	8	8	8	8	9	9	9	9	9	9	9	9	9	9	0	0	0	0	0	0	0	0	0	0	1	1	1	1	1	1	1	1	1	1	2	2	2	2	2	2	2	2	2	2	3
1	2	3	4	5	6	7	8	9	0	1	2	3	4	5	6	7	8	9	0	1	2	3	4	5	6	7	8	9	0	1	2	3	4	5	6	7	8	9	0	1	2	3	4	5	6	7	8	9	0
bog175	T	T	T	T	T	C	T	A	G	C	C	G	T	T	T	G	G	C	T	T	G	T	T	T	C	T	G	G	A	G	A	C	A	T	G	C	A	A	T	T	T	G	A	A	G	A	A	T	T
pse139	T	T	T	T	T	C	T	A	G	C	C	G	T	T	T	G	G	C	T	T	G	T	T	T	C	T	G	G	A	G	A	C	A	T	G	C	A	A	T	T	T	G	A	A	G	A	A	T	T
DpseFB	T	T	T	T	T	C	T	A	G	C	C	G	T	T	T	G	G	C	T	T	G	T	T	T	C	T	G	G	A	G	A	C	A	T	G	C	A	A	T	T	T	G	A	A	G	A	A	T	T
	70	71	72	73	74	75	76	77	78	79	80	81	82	83	84	85	86	87	88	89	90	91	92	93	94	95	96	97	98	99	100	101	102	103	104	105	106	107	108	109	110	111	112	113	114	115	116	117	118
1	1	1	1	1	1	1	1	1	1	1	1	1	1	1	1	1	1	1	1	1	1	1	1	1	1	1	1	1	1	1	1	1	1	1	1	1	1	1	1	1	1	1	1	1	1	1	1	1	1
3	3	3	3	3	3	3	3	3	3	3	3	3	3	3	3	3	3	3	3	3	3	3	3	3	3	3	3	3	3	3	3	3	3	3	3	3	3	3	4	4	4	4	4	4	4	4	4	4	4
6	6	6	6	6	6	6	6	6	7	7	7	7	7	7	7	7	7	7	8	8	8	8	8	8	8	8	8	8	9	9	9	9	9	9	9	9	9	9	0	0	0	0	0	0	0	0	0	0	1
1	2	3	4	5	6	7	8	9	0	1	2	3	4	5	6	7	8	9	0	1	2	3	4	5	6	7	8	9	0	1	2	3	4	5	6	7	8	9	0	1	2	3	4	5	6	7	8	9	0
bog175	A	T	G	C	A	A	G	A	G	C	G	G	A	A	A	G	G	T	T	T	G	T	T	A	T	C	C	A	T	A	G	A	T	T	T	G	G	C	A	A	A	A	A	A	A	A	G	A	T
pse139	A	T	G	C	A	A	G	A	G	C	G	G	A	A	A	G	G	T	T	T	G	T	T	A	T	C	C	A	T	A	G	A	T	T	T	G	G	C	A	A	A	A	A	A	A	A	G	A	T
DpseFB	T	T	G	C	A	A	G	A	G	C	G	G	A	A	A	G	G	T	T	T	G	T	T	A	T	C	C	A	T	A	G	A	T	T	T	G	G	C	A	A	A	A	A	A	A	A	G	A	T
	150	151	152	153	154	155	156	157	158	159	160	161	162	163	164	165	166	167	168	169	170	171	172	173	174	175	176	177	178	179	180	181	182	183	184	185	186	187	188	189	190	191	192	193	194	195	196	197	198
1	1	1	1	1	1	1	1	1	1	1	1	1	1	1	1	1	1	1	1	1	1	1	1	1	1	1	1	1	1	1	1	1	1	1	1	1	1	1	1	1	1	1	1	1	1	1	1	1	1
4	4	4	4	4	4	4	4	4	4	4	4	4	4	4	4	4	4	4	4	4	4	4	4	4	4	4	4	4	4	4	4	4	4	4	4	4	4	4	4	4	4	4	4	4	4	4	4	4	4
4	4	4	4	4	4	4	4	4	5	5	5	5	5	5	5	5	5	5	6	6	6	6	6	6	6	6	6	6	7	7	7	7	7	7	7	7	7	7	8	8	8	8	8	8	8	8	8	8	9
1	2	3	4	5	6	7	8	9	0	1	2	3	4	5	6	7	8	9	0	1	2	3	4	5	6	7	8	9	0	1	2	3	4	5	6	7	8	9	0	1	2	3	4	5	6	7	8	9	0
bog175	T	G	C	C	T	C	A	T	A	G	C	C	A	A	A	A	C	A	T	C	C	T	A	C	G	G	C	A	A	T	T	G	C	A	A	T	G	G	A	A	A	G	C	G	C	A	A	A	A
pse139	T	G	C	C	T	C	A	T	A	G	C	C	A	A	A	A	C	A	T	C	C	T	A	C	G	G	C	A	A	T	T	G	C	A	A	T	G	G	A	A	A	G	C	G	C	A	A	A	A
DpseFB	T	G	C	C	T	C	A	T	A	G	C	C	A	A	A	A	C	A	T	C	C	T	A	C	G	G	C	A	A	T	T	G	C	A	A	T	G	G	A	A	A	G	C	G	C	A	A	A	A
	230	231	232	233	234	235	236	237	238	239	240	241	242	243	244	245	246	247	248	249	250	251	252	253	254	255	256	257	258	259	260	261	262	263	264	265	266	267	268	269	270	271	272	273	274	275	276	277	278
1	1	1	1	1	1	1	1	1	1	1	1	1	1	1	1	1	1	1	1	1	1	1	1	1	1	1	1	1	1	1	1	1	1	1	1	1	1	1	1	1	1	1	1	1	1	1	1	1	1
5	5	5	5	5	5	5	5	5	5	5	5	5	5	5	5	5	5	5	5	5	5	5	5	5	5	5	5	5	5	5	5	5	5	5	5	5	5	5	5	5	5	5	5	5	5	5	5	5	5
2	2	2	2	2	2	2	2	2	3	3	3	3	3	3	3	3	3	3	4	4	4	4	4	4	4	4	4	4	5	5	5	5	5	5	5	5	5	5	6	6	6	6	6	6	6	6	6	6	7
1	2	3	4	5	6	7	8	9	0	1	2	3	4	5	6	7	8	9	0	1	2	3	4	5	6	7	8	9	0	1	2	3	4	5	6	7	8	9	0	1	2	3	4	5	6	7	8	9	0
bog175	C	C	A	T	A	C	G	T	T	C	A	T	C	T	A	T	T	C	G	A	A	C	T	G	T	G	G	C	G	G	A	A	A	Y	C	G	A	A	A	T	C	G	T	T	T	T	T	A	C
pse139	C	C	A	T	A	C	G	T	T	C	A	T	C	T	A	T	T	C	G	A	A	C	T	G	T	G	G	C	G	G	A	A	A	T	C	G	A	A	A	T	C	G	T	T	T	T	T	A	C
DpseFB	C	C	A	C	A	C	G	T	T	C	A	T	C	T	A	T	T	C	G	A	A	C	T	G	T	G	G	C	G	G	A	A	A	C	C	G	A	A	A	T	C	G	T	T	T	T	T	A	C
	310	311	312	313	314	315	316	317	318	319	320	321	322	323	324	325	326	327	328	329	330	331	332	333	334	335	336	337	338	339	340	341	342	343	344	345	346	347	348	349	350	351	352	353	354	355	356	357	358
[truncated: 31 more columns]

## Sheet: GA30092
GA30092 (-1139>+528)
									1	1	1	1	1	1	1	1	1	1	2	2	2	2	2	2	2	2	2	2	3	3	3	3	3	3	3	3	3	3	4	4	4	4	4	4	4	4	4	4	5
1	2	3	4	5	6	7	8	9	0	1	2	3	4	5	6	7	8	9	0	1	2	3	4	5	6	7	8	9	0	1	2	3	4	5	6	7	8	9	0	1	2	3	4	5	6	7	8	9	0
bog175	A	T	T	A	C	A	A	T	G	T	C	C	G	T	C	G	A	A	A	T	A	A	A	T	G	C	C	A	T	A	C	G	T	T	C	A	T	C	T	A	T	T	C	G	A	A	C	T	G
pse139	-	-	-	-	-	-	-	-	-	-	-	-	-	-	-	-	-	-	-	-	-	-	-	-	-	-	-	-	-	-	-	-	-	-	-	-	-	-	-	-	-	-	-	-	-	-	C	T	G
pse FB	A	T	T	A	C	A	A	T	G	T	C	C	G	T	C	G	A	A	A	T	A	A	A	T	G	C	C	A	C	A	C	G	T	T	C	A	T	C	T	A	T	T	C	G	A	A	C	T	G
	-1139	-1138	-1137	-1136	-1135	-1134	-1133	-1132	-1131	-1130	-1129	-1128	-1127	-1126	-1125	-1124	-1123	-1122	-1121	-1120	-1119	-1118	-1117	-1116	-1115	-1114	-1113	-1112	-1111	-1110	-1109	-1108	-1107	-1106	-1105	-1104	-1103	-1102	-1101	-1100	-1099	-1098	-1097	-1096	-1095	-1094	-1093	-1092	-1091
																			1	1	1	1	1	1	1	1	1	1	1	1	1	1	1	1	1	1	1	1	1	1	1	1	1	1	1	1	1	1	1
8	8	8	8	8	8	8	8	8	9	9	9	9	9	9	9	9	9	9	0	0	0	0	0	0	0	0	0	0	1	1	1	1	1	1	1	1	1	1	2	2	2	2	2	2	2	2	2	2	3
1	2	3	4	5	6	7	8	9	0	1	2	3	4	5	6	7	8	9	0	1	2	3	4	5	6	7	8	9	0	1	2	3	4	5	6	7	8	9	0	1	2	3	4	5	6	7	8	9	0
bog175	G	A	G	G	A	G	T	G	C	A	T	G	G	A	A	T	T	T	T	G	C	G	G	C	G	G	C	T	A	C	A	A	C	T	T	G	C	A	A	G	A	A	T	A	C	C	A	A	A
pse139	G	A	G	G	A	G	T	G	C	A	T	G	G	A	A	T	T	T	T	G	C	G	G	C	G	G	C	T	A	C	A	A	C	T	T	G	C	A	A	G	A	A	T	A	C	C	A	A	A
pse FB	G	A	G	G	A	G	T	G	C	A	T	G	G	A	A	T	T	T	T	G	C	G	G	C	G	G	C	T	A	C	A	A	C	T	T	G	C	A	A	G	A	A	T	A	C	C	A	A	A
	-1059	-1058	-1057	-1056	-1055	-1054	-1053	-1052	-1051	-1050	-1049	-1048	-1047	-1046	-1045	-1044	-1043	-1042	-1041	-1040	-1039	-1038	-1037	-1036	-1035	-1034	-1033	-1032	-1031	-1030	-1029	-1028	-1027	-1026	-1025	-1024	-1023	-1022	-1021	-1020	-1019	-1018	-1017	-1016	-1015	-1014	-1013	-1012	-1011
1	1	1	1	1	1	1	1	1	1	1	1	1	1	1	1	1	1	1	1	1	1	1	1	1	1	1	1	1	1	1	1	1	1	1	1	1	1	1	2	2	2	2	2	2	2	2	2	2	2
6	6	6	6	6	6	6	6	6	7	7	7	7	7	7	7	7	7	7	8	8	8	8	8	8	8	8	8	8	9	9	9	9	9	9	9	9	9	9	0	0	0	0	0	0	0	0	0	0	1
1	2	3	4	5	6	7	8	9	0	1	2	3	4	5	6	7	8	9	0	1	2	3	4	5	6	7	8	9	0	1	2	3	4	5	6	7	8	9	0	1	2	3	4	5	6	7	8	9	0
bog175	A	T	G	A	G	T	A	T	T	G	T	A	T	A	G	T	T	A	T	T	T	C	T	A	T	T	A	A	T	A	T	T	A	A	T	A	A	W	A	A	R	A	G	G	T	T	T	G	T
pse139	A	T	G	A	G	T	A	T	T	G	T	A	T	A	T	T	T	A	T	T	T	C	T	A	T	T	A	A	T	A	T	T	A	A	T	A	A	T	A	A	G	A	G	G	T	T	T	G	T
pse FB	A	T	G	A	G	T	A	T	T	G	T	A	T	A	T	T	T	A	T	T	T	C	T	A	T	T	A	A	T	A	T	T	A	A	T	A	A	T	A	A	G	A	G	G	T	T	T	G	T
	-979	-978	-977	-976	-975	-974	-973	-972	-971	-970	-969	-968	-967	-966	-965	-964	-963	-962	-961	-960	-959	-958	-957	-956	-955	-954	-953	-952	-951	-950	-949	-948	-947	-946	-945	-944	-943	-942	-941	-940	-939	-938	-937	-936	-935	-934	-933	-932	-931
2	2	2	2	2	2	2	2	2	2	2	2	2	2	2	2	2	2	2	2	2	2	2	2	2	2	2	2	2	2	2	2	2	2	2	2	2	2	2	2	2	2	2	2	2	2	2	2	2	2
4	4	4	4	4	4	4	4	4	5	5	5	5	5	5	5	5	5	5	6	6	6	6	6	6	6	6	6	6	7	7	7	7	7	7	7	7	7	7	8	8	8	8	8	8	8	8	8	8	9
1	2	3	4	5	6	7	8	9	0	1	2	3	4	5	6	7	8	9	0	1	2	3	4	5	6	7	8	9	0	1	2	3	4	5	6	7	8	9	0	1	2	3	4	5	6	7	8	9	0
bog175	A	A	T	C	T	T	T	A	A	G	C	T	A	C	A	A	C	T	C	T	T	T	C	T	A	A	G	T	G	A	C	A	T	T	T	T	C	A	A	T	A	A	A	A	A	W	A	A	T
pse139	A	A	T	C	T	T	T	A	A	G	C	T	A	C	A	A	C	T	C	T	T	T	C	T	A	A	G	T	G	A	C	A	T	T	T	T	C	A	A	T	A	A	A	A	A	T	A	A	T
pse FB	A	A	T	C	T	T	T	A	A	G	C	T	A	C	A	A	C	T	C	T	T	T	C	T	A	A	G	T	G	A	C	A	T	T	T	T	C	A	A	T	A	A	A	A	A	T	A	A	T
	-899	-898	-897	-896	-895	-894	-893	-892	-891	-890	-889	-888	-887	-886	-885	-884	-883	-882	-881	-880	-879	-878	-877	-876	-875	-874	-873	-872	-871	-870	-869	-868	-867	-866	-865	-864	-863	-862	-861	-860	-859	-858	-857	-856	-855	-854	-853	-852	-851
3	3	3	3	3	3	3	3	3	3	3	3	3	3	3	3	3	3	3	3	3	3	3	3	3	3	3	3	3	3	3	3	3	3	3	3	3	3	3	3	3	3	3	3	3	3	3	3	3	3
2	2	2	2	2	2	2	2	2	3	3	3	3	3	3	3	3	3	3	4	4	4	4	4	4	4	4	4	4	5	5	5	5	5	5	5	5	5	5	6	6	6	6	6	6	6	6	6	6	7
1	2	3	4	5	6	7	8	9	0	1	2	3	4	5	6	7	8	9	0	1	2	3	4	5	6	7	8	9	0	1	2	3	4	5	6	7	8	9	0	1	2	3	4	5	6	7	8	9	0
bog175	T	G	T	G	G	C	T	G	A	G	G	G	A	T	A	G	C	T	A	T	C	G	A	G	A	G	G	A	A	G	A	C	G	A	A	G	A	A	G	G	A	T	T	A	G	A	T	A	T
pse139	T	G	T	G	G	C	T	G	A	G	G	G	A	T	A	G	C	T	A	T	C	G	A	G	A	G	G	A	A	G	A	C	G	A	A	G	A	A	G	G	A	T	T	A	G	A	T	A	T
pse FB	T	G	T	G	G	C	T	G	A	G	G	G	A	T	A	G	C	T	A	T	C	G	A	G	A	G	G	A	A	G	A	C	G	A	A	G	A	A	G	G	A	T	T	A	G	A	T	A	T
	-819	-818	-817	-816	-815	-814	-813	-812	-811	-810	-809	-808	-807	-806	-805	-804	-803	-802	-801	-800	-799	-798	-797	-796	-795	-794	-793	-792	-791	-790	-789	-788	-787	-786	-785	-784	-783	-782	-781	-780	-779	-778	-777	-776	-775	-774	-773	-772	-771
4	4	4	4	4	4	4	4	4	4	4	4	4	4	4	4	4	4	4	4	4	4	4	4	4	4	4	4	4	4	4	4	4	4	4	4	4	4	4	4	4	4	4	4	4	4	4	4	4	4
0	0	0	0	0	0	0	0	0	1	1	1	1	1	1	1	1	1	1	2	2	2	2	2	2	2	2	2	2	3	3	3	3	3	3	3	3	3	3	4	4	4	4	4	4	4	4	4	4	5
1	2	3	4	5	6	7	8	9	0	1	2	3	4	5	6	7	8	9	0	1	2	3	4	5	6	7	8	9	0	1	2	3	4	5	6	7	8	9	0	1	2	3	4	5	6	7	8	9	0
bog175	A	T	A	A	C	A	A	A	T	A	A	-	-	-	-	A	T	A	T	G	T	T	A	C	A	A	A	T	T	T	T	T	A	A	T	T	G	A	T	A	A	T	A	T	T	T	A	G	C
pse139	A	T	A	A	C	A	A	A	T	A	A	A	T	A	C	A	T	A	T	G	T	T	A	C	A	A	A	T	T	T	T	T	A	A	T	T	G	A	T	A	A	T	A	T	T	T	A	G	C
pse FB	A	T	A	A	C	A	A	A	T	A	A	A	T	A	C	A	T	A	T	G	T	T	A	C	A	A	A	T	T	T	T	T	A	A	T	T	G	A	T	A	A	T	A	T	T	T	A	G	C
	-739	-738	-737	-736	-735	-734	-733	-732	-731	-730	-729	-728	-727	-726	-725	-724	-723	-722	-721	-720	-719	-718	-717	-716	-715	-714	-713	-712	-711	-710	-709	-708	-707	-706	-705	-704	-703	-702	-701	-700	-699	-698	-697	-696	-695	-694	-693	-692	-691
4	4	4	4	4	4	4	4	4	4	4	4	4	4	4	4	4	4	4	5	5	5	5	5	5	5	5	5	5	5	5	5	5	5	5	5	5	5	5	5	5	5	5	5	5	5	5	5	5	5
8	8	8	8	8	8	8	8	8	9	9	9	9	9	9	9	9	9	9	0	0	0	0	0	0	0	0	0	0	1	1	1	1	1	1	1	1	1	1	2	2	2	2	2	2	2	2	2	2	3
1	2	3	4	5	6	7	8	9	0	1	2	3	4	5	6	7	8	9	0	1	2	3	4	5	6	7	8	9	0	1	2	3	4	5	6	7	8	9	0	1	2	3	4	5	6	7	8	9	0
bog175	G	C	T	G	A	T	T	C	T	T	T	G	T	T	T	T	G	C	G	T	C	G	T	T	A	G	T	C	T	T	C	G	T	G	G	A	G	A	A	G	A	T	C	A	T	T	G	C	T
pse139	G	C	T	G	A	T	T	C	T	T	T	G	T	T	T	T	G	C	G	T	C	G	T	T	A	G	T	C	T	T	C	G	T	G	G	A	G	A	A	G	A	T	C	A	T	T	G	C	T
pse FB	G	C	T	G	A	T	T	C	T	T	T	G	T	T	T	T	G	C	G	T	C	G	T	T	A	G	T	C	T	T	C	G	T	G	G	A	G	A	A	G	A	T	C	A	T	T	G	C	T
	-659	-658	-657	-656	-655	-654	-653	-652	-651	-650	-649	-648	-647	-646	-645	-644	-643	-642	-641	-640	-639	-638	-637	-636	-635	-634	-633	-632	-631	-630	-629	-628	-627	-626	-625	-624	-623	-622	-621	-620	-619	-618	-617	-616	-615	-614	-613	-612	-611
5	5	5	5	5	5	5	5	5	5	5	5	5	5	5	5	5	5	5	5	5	5	5	5	5	5	5	5	5	5	5	5	5	5	5	5	5	5	5	6	6	6	6	6	6	6	6	6	6	6
6	6	6	6	6	6	6	6	6	7	7	7	7	7	7	7	7	7	7	8	8	8	8	8	8	8	8	8	8	9	9	9	9	9	9	9	9	9	9	0	0	0	0	0	0	0	0	0	0	1
1	2	3	4	5	6	7	8	9	0	1	2	3	4	5	6	7	8	9	0	1	2	3	4	5	6	7	8	9	0	1	2	3	4	5	6	7	8	9	0	1	2	3	4	5	6	7	8	9	0
bog175	T	T	C	T	T	T	C	T	G	C	A	A	A	T	A	T	T	G	C	C	G	C	A	C	A	C	G	A	T	T	C	T	C	T	C	C	C	G	C	C	G	C	C	G	T	C	G	T	T
pse139	T	T	C	T	T	T	C	T	G	C	A	A	A	T	A	T	T	G	C	C	G	C	A	C	A	C	G	A	T	T	C	T	C	T	C	C	C	G	C	C	G	C	C	G	T	C	G	T	T
pse FB	T	T	C	T	T	T	C	T	G	C	A	A	A	T	A	T	T	G	C	C	G	C	A	C	A	C	G	A	T	T	C	T	C	T	C	C	C	G	C	C	G	C	C	G	T	C	G	T	T
	-579	-578	-577	-576	-575	-574	-573	-572	-571	-570	-569	-568	-567	-566	-565	-564	-563	-562	-561	-560	-559	-558	-557	-556	-555	-554	-553	-552	-551	-550	-549	-548	-547	-546	-545	-544	-543	-542	-541	-540	-539	-538	-537	-536	-535	-534	-533	-532	-531
6	6	6	6	6	6	6	6	6	6	6	6	6	6	6	6	6	6	6	6	6	6	6	6	6	6	6	6	6	6	6	6	6	6	6	6	6	6	6	6	6	6	6	6	6	6	6	6	6	6
4	4	4	4	4	4	4	4	4	5	5	5	5	5	5	5	5	5	5	6	6	6	6	6	6	6	6	6	6	7	7	7	7	7	7	7	7	7	7	8	8	8	8	8	8	8	8	8	8	9
1	2	3	4	5	6	7	8	9	0	1	2	3	4	5	6	7	8	9	0	1	2	3	4	5	6	7	8	9	0	1	2	3	4	5	6	7	8	9	0	1	2	3	4	5	6	7	8	9	0
bog175	C	G	T	T	G	A	A	G	C	A	C	G	G	T	T	G	C	T	C	G	T	C	A	T	T	G	T	T	T	A	G	G	G	G	G	T	A	C	G	G	A	A	G	T	A	T	T	C	T
pse139	C	G	T	T	G	A	A	G	C	A	C	G	G	T	T	G	C	T	C	G	T	C	A	T	T	G	T	T	T	A	G	G	G	G	G	T	A	C	G	G	A	A	G	T	A	T	T	C	T
pse FB	C	G	T	T	G	A	A	G	C	A	C	G	G	T	T	G	C	T	C	G	T	C	A	T	T	G	T	T	T	A	G	G	G	G	G	T	A	C	G	G	A	A	G	T	A	T	T	C	T
	-499	-498	-497	-496	-495	-494	-493	-492	-491	-490	-489	-488	-487	-486	-485	-484	-483	-482	-481	-480	-479	-478	-477	-476	-475	-474	-473	-472	-471	-470	-469	-468	-467	-466	-465	-464	-463	-462	-461	-460	-459	-458	-457	-456	-455	-454	-453	-452	-451
7	7	7	7	7	7	7	7	7	7	7	7	7	7	7	7	7	7	7	7	7	7	7	7	7	7	7	7	7	7	7	7	7	7	7	7	7	7	7	7	7	7	7	7	7	7	7	7	7	7
2	2	2	2	2	2	2	2	2	3	3	3	3	3	3	3	3	3	3	4	4	4	4	4	4	4	4	4	4	5	5	5	5	5	5	5	5	5	5	6	6	6	6	6	6	6	6	6	6	7
1	2	3	4	5	6	7	8	9	0	1	2	3	4	5	6	7	8	9	0	1	2	3	4	5	6	7	8	9	0	1	2	3	4	5	6	7	8	9	0	1	2	3	4	5	6	7	8	9	0
bog175	A	A	C	T	A	T	G	C	A	T	A	A	G	A	A	C	T	T	A	A	G	A	A	C	T	T	A	A	C	T	T	A	A	G	A	A	C	T	T	T	A	C	C	A	A	G	C	G	A
pse139	A	A	C	T	A	T	G	C	A	T	A	A	G	A	A	C	T	T	A	A	G	A	A	C	T	T	A	A	C	T	T	A	A	G	A	A	C	T	T	T	A	C	C	A	A	G	C	G	A
pse FB	A	A	C	T	A	T	G	C	A	T	A	A	G	A	A	C	T	T	A	A	G	A	A	C	T	T	A	A	C	T	T	A	A	G	A	A	C	T	T	T	A	C	C	A	A	G	C	G	A
	-419	-418	-417	-416	-415	-414	-413	-412	-411	-410	-409	-408	-407	-406	-405	-404	-403	-402	-401	-400	-399	-398	-397	-396	-395	-394	-393	-392	-391	-390	-389	-388	-387	-386	-385	-384	-383	-382	-381	-380	-379	-378	-377	-376	-375	-374	-373	-372	-371
8	8	8	8	8	8	8	8	8	8	8	8	8	8	8	8	8	8	8	8	8	8	8	8	8	8	8	8	8	8	8	8	8	8	8	8	8	8	8	8	8	8	8	8	8	8	8	8	8	8
0	0	0	0	0	0	0	0	0	1	1	1	1	1	1	1	1	1	1	2	2	2	2	2	2	2	2	2	2	3	3	3	3	3	3	3	3	3	3	4	4	4	4	4	4	4	4	4	4	5
1	2	3	4	5	6	7	8	9	0	1	2	3	4	5	6	7	8	9	0	1	2	3	4	5	6	7	8	9	0	1	2	3	4	5	6	7	8	9	0	1	2	3	4	5	6	7	8	9	0
bog175	G	A	T	T	T	A	G	A	G	A	A	A	A	G	C	A	G	A	G	A	G	A	C	G	C	C	A	C	T	T	G	T	G	A	A	A	G	C	A	A	A	A	T	A	C	A	A	C	A
pse139	G	A	T	T	T	A	G	A	G	A	A	A	A	G	C	A	G	A	G	A	G	A	C	G	C	C	A	C	T	T	G	T	G	A	A	A	G	C	A	A	A	A	T	A	C	A	A	C	A
pse FB	G	A	T	T	T	A	G	A	G	A	A	A	A	G	C	A	G	A	G	A	G	A	C	G	C	C	A	C	T	T	G	T	G	A	A	A	G	C	A	A	A	A	T	A	C	A	A	C	A
	-339	-338	-337	-336	-335	-334	-333	-332	-331	-330	-329	-328	-327	-326	-325	-324	-323	-322	-321	-320	-319	-318	-317	-316	-315	-314	-313	-312	-311	-310	-309	-308	-307	-306	-305	-304	-303	-302	-301	-300	-299	-298	-297	-296	-295	-294	-293	-292	-291
8	8	8	8	8	8	8	8	8	8	8	8	8	8	8	8	8	8	8	9	9	9	9	9	9	9	9	9	9	9	9	9	9	9	9	9	9	9	9	9	9	9	9	9	9	9	9	9	9	9
8	8	8	8	8	8	8	8	8	9	9	9	9	9	9	9	9	9	9	0	0	0	0	0	0	0	0	0	0	1	1	1	1	1	1	1	1	1	1	2	2	2	2	2	2	2	2	2	2	3
1	2	3	4	5	6	7	8	9	0	1	2	3	4	5	6	7	8	9	0	1	2	3	4	5	6	7	8	9	0	1	2	3	4	5	6	7	8	9	0	1	2	3	4	5	6	7	8	9	0
bog175	T	C	T	T	G	A	A	T	C	T	T	G	A	A	T	G	A	A	A	T	C	T	G	A	A	A	G	C	A	A	T	C	A	A	A	A	A	A	A	T	A	A	A	G	T	A	A	A	T
pse139	T	C	T	T	G	A	A	T	C	T	T	G	A	A	T	G	A	A	A	T	C	T	G	A	A	A	G	C	A	A	T	C	A	A	A	A	A	A	A	T	A	A	A	G	T	A	A	A	T
pse FB	T	C	T	T	G	A	A	T	C	T	T	G	A	A	T	G	A	A	A	T	C	T	G	A	A	A	G	C	A	A	T	C	A	A	A	A	A	A	A	T	A	A	A	G	T	A	A	A	T
	-259	-258	-257	-256	-255	-254	-253	-252	-251	-250	-249	-248	-247	-246	-245	-244	-243	-242	-241	-240	-239	-238	-237	-236	-235	-234	-233	-232	-231	-230	-229	-228	-227	-226	-225	-224	-223	-222	-221	-220	-219	-218	-217	-216	-215	-214	-213	-212	-211
																																							1	1	1	1	1	1	1	1	1	1	1
9	9	9	9	9	9	9	9	9	9	9	9	9	9	9	9	9	9	9	9	9	9	9	9	9	9	9	9	9	9	9	9	9	9	9	9	9	9	9	0	0	0	0	0	0	0	0	0	0	0
6	6	6	6	6	6	6	6	6	7	7	7	7	7	7	7	7	7	7	8	8	8	8	8	8	8	8	8	8	9	9	9	9	9	9	9	9	9	9	0	0	0	0	0	0	0	0	0	0	1
1	2	3	4	5	6	7	8	9	0	1	2	3	4	5	6	7	8	9	0	1	2	3	4	5	6	7	8	9	0	1	2	3	4	5	6	7	8	9	0	1	2	3	4	5	6	7	8	9	0
bog175	T	T	T	G	T	T	C	G	G	T	G	T	T	T	A	G	C	A	A	A	T	G	C	C	C	A	A	G	A	A	C	T	T	T	G	C	T	A	C	A	T	T	T	A	A	G	T	A	T
pse139	T	T	T	G	T	T	C	G	G	T	G	T	T	T	A	G	C	A	A	A	T	G	C	C	C	A	A	G	A	A	C	T	T	T	G	C	T	A	C	A	T	T	T	A	A	G	T	A	T
pse FB	T	T	T	G	T	T	C	G	G	T	G	T	T	T	A	G	C	A	A	A	T	G	C	C	C	A	A	G	A	A	C	T	T	T	G	C	T	A	C	A	T	T	T	A	A	G	T	A	T
	-179	-178	-177	-176	-175	-174	-173	-172	-171	-170	-169	-168	-167	-166	-165	-164	-163	-162	-161	-160	-159	-158	-157	-156	-155	-154	-153	-152	-151	-150	-149	-148	-147	-146	-145	-144	-143	-142	-141	-140	-139	-138	-137	-136	-135	-134	-133	-132	-131
1	1	1	1	1	1	1	1	1	1	1	1	1	1	1	1	1	1	1	1	1	1	1	1	1	1	1	1	1	1	1	1	1	1	1	1	1	1	1	1	1	1	1	1	1	1	1	1	1	1
0	0	0	0	0	0	0	0	0	0	0	0	0	0	0	0	0	0	0	0	0	0	0	0	0	0	0	0	0	0	0	0	0	0	0	0	0	0	0	0	0	0	0	0	0	0	0	0	0	0
4	4	4	4	4	4	4	4	4	5	5	5	5	5	5	5	5	5	5	6	6	6	6	6	6	6	6	6	6	7	7	7	7	7	7	7	7	7	7	8	8	8	8	8	8	8	8	8	8	9
1	2	3	4	5	6	7	8	9	0	1	2	3	4	5	6	7	8	9	0	1	2	3	4	5	6	7	8	9	0	1	2	3	4	5	6	7	8	9	0	1	2	3	4	5	6	7	8	9	0
bog175	T	G	C	A	A	G	T	G	A	G	A	A	C	T	T	T	C	G	T	G	A	T	G	A	A	G	T	G	G	A	G	T	G	C	G	C	T	G	C	C	T	C	C	T	C	C	T	T	T
pse139	T	G	C	A	A	G	T	G	A	G	A	A	C	T	T	T	C	G	T	G	A	T	G	A	A	G	T	G	G	A	G	T	R	C	G	C	T	G	C	C	T	C	C	T	C	C	T	T	T
pse FB	T	G	C	A	A	G	T	G	A	G	A	A	C	T	T	T	C	G	T	G	A	T	G	A	A	G	T	G	G	A	G	T	A	C	G	C	T	G	C	C	T	C	C	T	C	C	T	T	T
	-99	-98	-97	-96	-95	-94	-93	-92	-91	-90	-89	-88	-87	-86	-85	-84	-83	-82	-81	-80	-79	-78	-77	-76	-75	-74	-73	-72	-71	-70	-69	-68	-67	-66	-65	-64	-63	-62	-61	-60	-59	-58	-57	-56	-55	-54	-53	-52	-51
1	1	1	1	1	1	1	1	1	1	1	1	1	1	1	1	1	1	1	1	1	1	1	1	1	1	1	1	1	1	1	1	1	1	1	1	1	1	1	1	1	1	1	1	1	1	1	1	1	1
1	1	1	1	1	1	1	1	1	1	1	1	1	1	1	1	1	1	1	1	1	1	1	1	1	1	1	1	1	1	1	1	1	1	1	1	1	1	1	1	1	1	1	1	1	1	1	1	1	1
2	2	2	2	2	2	2	2	2	3	3	3	3	3	3	3	3	3	3	4	4	4	4	4	4	4	4	4	4	5	5	5	5	5	5	5	5	5	5	6	6	6	6	6	6	6	6	6	6	7
1	2	3	4	5	6	7	8	9	0	1	2	3	4	5	6	7	8	9	0	1	2	3	4	5	6	7	8	9	0	1	2	3	4	5	6	7	8	9	0	1	2	3	4	5	6	7	8	9	0
bog175	G	T	G	C	C	T	T	A	T	T	C	G	A	T	C	A	G	T	A	G	T	A	G	C	T	C	C	C	A	G	T	G	G	A	T	G	C	C	G	A	G	T	A	G	A	T	C	T	C
pse139	G	T	G	C	C	T	T	A	T	T	C	G	A	T	C	A	G	T	A	G	T	A	G	C	T	C	C	C	A	G	T	G	G	A	T	G	C	C	G	A	G	T	A	G	A	T	C	G	C
pse FB	G	T	G	C	C	T	T	A	T	T	C	G	A	T	C	A	G	T	A	G	T	A	G	C	T	C	C	C	A	G	T	G	G	A	T	G	C	C	G	A	G	T	A	G	A	T	C	T	C
	-19	-18	-17	-16	-15	-14	-13	-12	-11	-10	-9	-8	-7	-6	-5	-4	-3	-2	-1	1	2	3	4	5	6	7	8	9	10	11	12	13	14	15	16	17	18	19	20	21	22	23	24	25	26	27	28	29	30
1	1	1	1	1	1	1	1	1	1	1	1	1	1	1	1	1	1	1	1	1	1	1	1	1	1	1	1	1	1	1	1	1	1	1	1	1	1	1	1	1	1	1	1	1	1	1	1	1	1
2	2	2	2	2	2	2	2	2	2	2	2	2	2	2	2	2	2	2	2	2	2	2	2	2	2	2	2	2	2	2	2	2	2	2	2	2	2	2	2	2	2	2	2	2	2	2	2	2	2
0	0	0	0	0	0	0	0	0	1	1	1	1	1	1	1	1	1	1	2	2	2	2	2	2	2	2	2	2	3	3	3	3	3	3	3	3	3	3	4	4	4	4	4	4	4	4	4	4	5
1	2	3	4	5	6	7	8	9	0	1	2	3	4	5	6	7	8	9	0	1	2	3	4	5	6	7	8	9	0	1	2	3	4	5	6	7	8	9	0	1	2	3	4	5	6	7	8	9	0
bog175	T	A	C	T	A	A	C	C	G	T	T	T	G	G	C	T	T	G	C	A	C	T	T	G	T	C	T	C	T	G	T	A	A	A	T	T	C	C	G	A	A	G	A	A	T	C	C	G	A
pse139	T	A	C	T	A	A	C	C	G	T	T	T	G	G	C	T	T	G	C	A	C	T	T	G	T	C	T	C	T	G	T	A	A	A	T	T	C	C	G	A	A	G	A	A	T	C	C	G	A
pse FB	T	A	C	T	A	A	C	C	G	T	T	T	G	G	C	T	T	G	C	A	C	T	T	G	T	C	T	C	T	G	T	A	A	A	T	T	C	C	G	A	A	G	A	A	T	C	C	G	A
	62	63	64	65	66	67	68	69	70	71	72	73	74	75	76	77	78	79	80	81	82	83	84	85	86	87	88	89	90	91	92	93	94	95	96	97	98	99	100	101	102	103	104	105	106	107	108	109	110
1	1	1	1	1	1	1	1	1	1	1	1	1	1	1	1	1	1	1	1	1	1	1	1	1	1	1	1	1	1	1	1	1	1	1	1	1	1	1	1	1	1	1	1	1	1	1	1	1	1
2	2	2	2	2	2	2	2	2	2	2	2	2	2	2	2	2	2	2	3	3	3	3	3	3	3	3	3	3	3	3	3	3	3	3	3	3	3	3	3	3	3	3	3	3	3	3	3	3	3
8	8	8	8	8	8	8	8	8	9	9	9	9	9	9	9	9	9	9	0	0	0	0	0	0	0	0	0	0	1	1	1	1	1	1	1	1	1	1	2	2	2	2	2	2	2	2	2	2	3
1	2	3	4	5	6	7	8	9	0	1	2	3	4	5	6	7	8	9	0	1	2	3	4	5	6	7	8	9	0	1	2	3	4	5	6	7	8	9	0	1	2	3	4	5	6	7	8	9	0
bog175	A	A	G	A	T	G	C	T	G	G	A	T	G	A	A	C	G	C	A	A	A	A	G	T	T	T	G	T	T	A	A	C	C	A	G	G	G	T	T	C	T	T	T	A	C	A	A	A	A
pse139	A	A	G	A	T	G	C	G	G	G	A	T	G	A	A	C	G	C	A	A	A	A	G	T	T	T	G	T	T	A	A	C	C	A	G	G	G	T	T	C	T	T	T	A	C	A	A	A	A
pse FB	A	A	G	A	T	G	C	G	G	G	A	T	G	A	A	C	G	C	A	A	A	A	G	T	T	T	G	T	T	A	A	C	C	A	G	G	G	T	T	C	T	T	T	A	C	A	A	A	A
	142	143	144	145	146	147	148	149	150	151	152	153	154	155	156	157	158	159	160	161	162	163	164	165	166	167	168	169	170	171	172	173	174	175	176	177	178	179	180	181	182	183	184	185	186	187	188	189	190
1	1	1	1	1	1	1	1	1	1	1	1	1	1	1	1	1	1	1	1	1	1	1	1	1	1	1	1	1	1	1	1	1	1	1	1	1	1	1	1	1	1	1	1	1	1	1	1	1	1
3	3	3	3	3	3	3	3	3	3	3	3	3	3	3	3	3	3	3	3	3	3	3	3	3	3	3	3	3	3	3	3	3	3	3	3	3	3	3	4	4	4	4	4	4	4	4	4	4	4
6	6	6	6	6	6	6	6	6	7	7	7	7	7	7	7	7	7	7	8	8	8	8	8	8	8	8	8	8	9	9	9	9	9	9	9	9	9	9	0	0	0	0	0	0	0	0	0	0	1
1	2	3	4	5	6	7	8	9	0	1	2	3	4	5	6	7	8	9	0	1	2	3	4	5	6	7	8	9	0	1	2	3	4	5	6	7	8	9	0	1	2	3	4	5	6	7	8	9	0
bog175	G	G	A	A	T	C	T	G	C	T	T	G	A	A	A	G	G	C	C	C	A	T	C	A	T	A	T	G	G	C	T	A	T	T	G	T	A	A	A	G	G	A	A	A	A	C	G	C	A
pse139	G	G	A	A	T	C	T	G	C	T	T	G	A	A	A	G	G	C	C	C	A	T	C	A	T	A	T	G	G	C	T	A	T	T	G	T	A	A	A	G	G	A	A	A	A	C	G	C	A
pse FB	G	G	A	A	T	C	T	G	C	T	T	G	A	A	A	G	G	C	C	C	A	T	C	A	T	A	T	G	G	C	T	A	T	T	G	T	A	A	A	G	G	A	A	A	A	C	G	C	A
	222	223	224	225	226	227	228	229	230	231	232	233	234	235	236	237	238	239	240	241	242	243	244	245	246	247	248	249	250	251	252	253	254	255	256	257	258	259	260	261	262	263	264	265	266	267	268	269	270
1	1	1	1	1	1	1	1	1	1	1	1	1	1	1	1	1	1	1	1	1	1	1	1	1	1	1	1	1	1	1	1	1	1	1	1	1	1	1	1	1	1	1	1	1	1	1	1	1	1
4	4	4	4	4	4	4	4	4	4	4	4	4	4	4	4	4	4	4	4	4	4	4	4	4	4	4	4	4	4	4	4	4	4	4	4	4	4	4	4	4	4	4	4	4	4	4	4	4	4
4	4	4	4	4	4	4	4	4	5	5	5	5	5	5	5	5	5	5	6	6	6	6	6	6	6	6	6	6	7	7	7	7	7	7	7	7	7	7	8	8	8	8	8	8	8	8	8	8	9
1	2	3	4	5	6	7	8	9	0	1	2	3	4	5	6	7	8	9	0	1	2	3	4	5	6	7	8	9	0	1	2	3	4	5	6	7	8	9	0	1	2	3	4	5	6	7	8	9	0
bog175	C	T	G	C	T	T	G	C	C	G	T	T	T	A	C	C	T	T	T	T	C	A	A	A	C	T	G	T	G	G	C	G	G	A	A	A	C	C	A	A	A	A	T	C	G	T	T	T	C
pse139	C	T	G	C	T	T	G	C	C	G	T	T	T	A	C	C	T	T	T	T	C	A	A	A	C	T	G	T	G	G	C	G	G	A	A	A	C	C	A	A	A	A	T	C	G	T	T	T	C
pse FB	C	T	G	C	T	T	G	C	C	G	T	T	T	A	C	C	T	T	T	T	C	A	A	A	C	T	G	T	G	G	C	G	G	A	A	A	C	C	A	A	A	A	T	C	G	T	T	T	C
	302	303	304	305	306	307	308	309	310	311	312	313	314	315	316	317	318	319	320	321	322	323	324	325	326	327	328	329	330	331	332	333	334	335	336	337	338	339	340	341	342	343	344	345	346	347	348	349	350
1	1	1	1	1	1	1	1	1	1	1	1	1	1	1	1	1	1	1	1	1	1	1	1	1	1	1	1	1	1	1	1	1	1	1	1	1	1	1	1	1	1	1	1	1	1	1	1	1	1
5	5	5	5	5	5	5	5	5	5	5	5	5	5	5	5	5	5	5	5	5	5	5	5	5	5	5	5	5	5	5	5	5	5	5	5	5	5	5	5	5	5	5	5	5	5	5	5	5	5
2	2	2	2	2	2	2	2	2	3	3	3	3	3	3	3	3	3	3	4	4	4	4	4	4	4	4	4	4	5	5	5	5	5	5	5	5	5	5	6	6	6	6	6	6	6	6	6	6	7
1	2	3	4	5	6	7	8	9	0	1	2	3	4	5	6	7	8	9	0	1	2	3	4	5	6	7	8	9	0	1	2	3	4	5	6	7	8	9	0	1	2	3	4	5	6	7	8	9	0
bog175	G	C	G	A	A	A	A	A	C	A	C	T	G	G	A	A	A	A	G	C	C	C	A	G	A	T	A	T	A	T	A	C	G	A	C	A	T	C	T	T	A	G	A	A	G	A	T	G	G
pse139	G	C	G	A	A	A	A	G	C	A	C	T	G	G	A	A	A	A	G	C	C	C	A	G	A	T	A	T	A	T	A	C	G	A	C	A	T	C	T	T	A	G	A	A	G	A	T	G	G
pse FB	G	C	G	A	A	A	A	A	C	A	C	T	G	G	A	A	A	A	G	C	C	C	A	G	A	T	A	T	A	T	A	C	G	A	C	A	T	C	T	T	A	G	A	A	G	A	T	G	G
	382	383	384	385	386	387	388	389	390	391	392	393	394	395	396	397	398	399	400	401	402	403	404	405	406	407	408	409	410	411	412	413	414	415	416	417	418	419	420	421	422	423	424	425	426	427	428	429	430
1	1	1	1	1	1	1	1	1	1	1	1	1	1	1	1	1	1	1	1	1	1	1	1	1	1	1	1	1	1	1	1	1	1	1	1	1	1	1	1	1	1	1	1	1	1	1	1	1	1
6	6	6	6	6	6	6	6	6	6	6	6	6	6	6	6	6	6	6	6	6	6	6	6	6	6	6	6	6	6	6	6	6	6	6	6	6	6	6	6	6	6	6	6	6	6	6	6	6	6
0	0	0	0	0	0	0	0	0	1	1	1	1	1	1	1	1	1	1	2	2	2	2	2	2	2	2	2	2	3	3	3	3	3	3	3	3	3	3	4	4	4	4	4	4	4	4	4	4	5
1	2	3	4	5	6	7	8	9	0	1	2	3	4	5	6	7	8	9	0	1	2	3	4	5	6	7	8	9	0	1	2	3	4	5	6	7	8	9	0	1	2	3	4	5	6	7	8	9	0
bog175	A	T	T	T	C	A	A	A	G	T	C	A	A	A	A	A	C	C	T	G	A	A	A	T	T	C	T	G	C	C	G	T	T	T	A	T	T	T	T	T	T	T	A	A	A	T	T	A	T
pse139	A	T	T	T	C	A	A	A	G	T	C	A	A	A	A	A	C	C	T	G	A	A	A	T	T	C	T	G	C	C	G	T	T	T	A	T	T	T	T	T	G	T	T	A	A	T	T	A	T
pse FB	A	T	T	T	C	A	A	A	G	T	C	A	A	A	A	A	C	C	T	G	A	A	A	T	T	C	T	G	C	C	G	T	T	T	A	T	T	T	T	T	G	T	T	A	A	T	T	A	T
	462	463	464	465	466	467	468	469	470	471	472	473	474	475	476	477	478	479	480	481	482	483	484	485	486	487	488	489	490	491	492	493	494	495	496	497	498	499	500	501	502	503	504	505	506	507	508	509	510
	Positions
SRX	-1006	-770
204785	b	b
204787	b	b
204784	p	b
204789	p	b
204748		b
204751		b
204753		b
204759		b
204763		b
204764		b
204767		b
204772		b
204773		b
204777		b
204782		b
204783		b
204792		b
204765	p	p
204756		p
204780		p
204790	b
204791	b
[truncated: 31 more columns]
